# Supplementary material for: Systems Network Genomic Analysis Reveals Cardioprotective Effect of MURC/Cavin‐4 Deletion Against Ischemia/Reperfusion Injury
Source: PubMed Central journal article supplement — J Am Heart Assoc. 2019 Jul 31;8(15):e012047. doi: 10.1161/JAHA.119.012047 (PMC6761664; doi:10.1161/jaha.119.012047), 2019-07-31
Supplement: JAH3-8-e012047-s001.pdf [file JAH3-8-e012047-s001.pdf]

# **SUPPLEMENTAL MATERIAL**

**Table S1. siRNA sequences.**

| Name                   | Sequence (5' to 3')       |
|------------------------|---------------------------|
| MURC siRNA-1 sense     | GCCCAUCCAUGAGUCCACUCUGAU  |
| MURC siRNA-1 antisense | AUCAGAGUGGAACUCAUGGAUGGGC |
| MURC siRNA-2 sense     | GVAAAGAGCACAUCGAUCAUAUAAA |
| MURC siRNA-2 antisense | UUAAUAUGAUCGAUGUGCUCUUUGC |

**Table S2. Quantitative RT-qPCR primers.**

| Name                   | Sequence (5' to 3')           |
|------------------------|-------------------------------|
| mouse <i>Bcl2</i> F    | CTCGTCGCTACCGTCGTGACTTCG      |
| mouse <i>Bcl2</i> R    | CAGATGCCGGTTCAGGTA CT CAGTC   |
| mouse <i>Egr1</i> F    | ATGAGCACCTGACCACAGAGTC        |
| mouse <i>Egr1</i> R    | GAGAAGCGGCCAGTATAGGTG         |
| mouse <i>Ddit4</i> F   | TCGTCCCTCGTCTCGAACTCC         |
| mouse <i>Ddit4</i> R   | CCATCCAGGTATGAGGAGTCTTCC      |
| mouse <i>MURC</i> F    | ACAGTCACACAGCAATACGGGCTA      |
| mouse <i>MURC</i> R    | TTCTCGGGCAGGCTTCTGTCTTTA      |
| rat <i>MURC</i> F      | ACTGAAGATGAAGACCAGGACGCA      |
| rat <i>MURC</i> R      | TGTTAACAACGTAGCCCGTGTTGC      |
| mouse <i>Gapdh</i> F   | TTGTGATGGGTGTGAACCACGAGA      |
| mouse <i>Gapdh</i> R   | CATGAGCCCTTCCACAATGCCAAA      |
| rat <i>Gapdh</i> F     | ATGGGAAGCTGGTCATCAAC          |
| rat <i>Gapdh</i> R     | GTGGTTCACACCCATCACAA          |
| mouse <i>Nox1</i> F    | CTGACAAGTACTATTACACCG         |
| mouse <i>Nox1</i> R    | CTGACAAGTACTATTACACGAGAG      |
| mouse <i>Nox2</i> F    | CATATATGCCACCAGCTTATGGAAG     |
| mouse <i>Nox2</i> R    | GTTCTCATTGTCACCGATGTCAG       |
| mouse <i>Nox3</i> F    | ACCCCTAACGAGAGCTACCTCAA       |
| mouse <i>Nox3</i> R    | GACCGGTGACGCCTGCTAT           |
| mouse <i>Nox4</i> F    | TGAGGAGTCACTGAACTATGAAGTTA    |
| mouse <i>Nox4</i> R    | TGACTGAGGTACAGCTGGAATGTT CACA |
| mouse <i>p22phox</i> F | CAATGGCCAAGCAGACGGTC          |
| mouse <i>p22phox</i> R | GTCCACCATGGAGCGATGTG          |
| mouse <i>p67phox</i> F | GCAGTGGCCTACTTCCAGAG          |
| mouse <i>p67phox</i> R | CTTCATGTTGGTTGCCAATG          |
| mouse <i>Rac1</i> F    | GTCCAATACTCCTATCATCCTC        |
| mouse <i>Rac1</i> R    | GAGCACTCCAGGTATTTGACAG        |

**Table S3. PC-corr network nodes and links.****PC-corr network nodes weights and labels at cut-off 0.6**

| #  | Node            | Colour | PC-corr Normalized Loading (V) |
|----|-----------------|--------|--------------------------------|
| 1  | n-R5s180        | Black  | -0.721354661                   |
| 2  | Gm22496         | Black  | -0.649040256                   |
| 3  | Gm23579         | Black  | -0.772801792                   |
| 4  | Gm14214         | Black  | -0.695256046                   |
| 5  | Gm23614         | Black  | -0.603048538                   |
| 6  | Gm23254         | Black  | -0.706045559                   |
| 7  | Gm22834         | Black  | -0.706677831                   |
| 8  | LOC102632904    | Black  | -0.624550714                   |
| 9  | Myl7            | Black  | -0.66021109                    |
| 10 | Gm10921         | Black  | -0.600872277                   |
| 11 | Gm22253         | Black  | -0.669850712                   |
| 12 | Gm25648         | Black  | -0.600369722                   |
| 13 | Gm23737         | Black  | -0.71365871                    |
| 14 | Gm23922         | Black  | -0.658574808                   |
| 15 | Lsm5            | Black  | -0.761220816                   |
| 16 | Gm25098         | Black  | -0.656646706                   |
| 17 | Gm25449         | Black  | -0.616392987                   |
| 18 | Gm21732         | Black  | -0.644501631                   |
| 19 | Gm25089         | Black  | -0.64846379                    |
| 20 | Gm21882         | Black  | -0.666405984                   |
| 21 | Gm23730         | Black  | -0.726798019                   |
| 22 | Gm23305         | Black  | -0.664243567                   |
| 23 | mt-Tt           | Black  | -0.859660173                   |
| 24 | Gm20831         | Black  | -0.613856901                   |
| 25 | Snord116        | Black  | -0.725166274                   |
| 26 | mt-Tc           | Black  | -0.847530386                   |
| 27 | Olfr166         | Black  | -0.63478488                    |
| 28 | Snord116 // Ipw | Black  | -0.695183163                   |
| 29 | Gm22510         | Black  | -0.625509447                   |
| 30 | Rnu1b1          | Black  | -0.904937482                   |
| 31 | Myl4            | Black  | -0.642387625                   |
| 32 | Gm22155         | Black  | -0.753346542                   |
| 33 | Olfr1231        | Black  | -0.618922514                   |
| 34 | Gm4787          | Black  | -0.605277579                   |
| 35 | Gm20806         | Black  | -0.603370638                   |
| 36 | Ipw             | Black  | -0.679543558                   |
| 37 | Olfr1034        | Black  | -0.662686071                   |
| 38 | Gm21943         | Black  | -0.62432152                    |
| 39 | LOC102640399    | Black  | -0.653001706                   |
| 40 | Gm10375         | Black  | -0.616879434                   |
| 41 | mt-Tf           | Black  | -0.843977183                   |
| 42 | Gm23947         | Black  | -0.642276287                   |
| 43 | Gm20815         | Black  | -0.624089122                   |

|    |               |       |              |
|----|---------------|-------|--------------|
| 44 | mt-Ts1        | Black | -0.823514957 |
| 45 | mt-Ty         | Black | -0.792687001 |
| 46 | Gm24624       | Black | -0.601008593 |
| 47 | LOC102633726  | Black | -0.610520962 |
| 48 | Gm20747       | Black | -0.607448307 |
| 49 | Trdn          | Black | -0.662913558 |
| 50 | Snora74a      | Black | -0.716709874 |
| 51 | mt-Ts2        | Black | -0.822093546 |
| 52 | Gm22866       | Black | -0.810797753 |
| 53 | Rnu12         | Black | -0.714196988 |
| 54 | Ppp4r2        | Black | -0.725777902 |
| 55 | Gm22749       | Black | -0.634337211 |
| 56 | Gm24149       | Black | -0.679383005 |
| 57 | Tmeff1        | Black | -0.65030418  |
| 58 | Gm23928       | Black | -0.602562509 |
| 59 | LOC102639563  | Black | -0.612052689 |
| 60 | Vaultc5       | Black | -0.728238836 |
| 61 | Inmt          | Black | -0.646471019 |
| 62 | Fam107a       | Black | -0.645410606 |
| 63 | mt-Tk         | Black | -0.720414242 |
| 64 | Brox          | Black | -0.657411274 |
| 65 | Glrx3         | Black | -0.616971069 |
| 66 | mt-Th         | Black | -0.66178471  |
| 67 | Ddit4         | Black | -0.63226978  |
| 68 | mt-Tp         | Black | -0.667405111 |
| 69 | mt-Ta         | Black | -0.680121023 |
| 70 | Mpv17         | Red   | 0.61068715   |
| 71 | Gm6245        | Red   | 0.638394295  |
| 72 | Cd59a         | Red   | 0.637322477  |
| 73 | Tmem159       | Red   | 0.60103159   |
| 74 | Acot2         | Red   | 0.679628534  |
| 75 | Dhdh          | Red   | 0.622508261  |
| 76 | Fam213a       | Red   | 0.643220229  |
| 77 | Nmnat1        | Red   | 0.605873152  |
| 78 | Coq5          | Red   | 0.677305385  |
| 79 | Tmem184c      | Red   | 0.651508083  |
| 80 | Nrn1          | Red   | 0.610300306  |
| 81 | Uppt          | Red   | 0.651921824  |
| 82 | Nsun3         | Red   | 0.673017501  |
| 83 | Gm10718       | Red   | 0.609800071  |
| 84 | Nr4a1         | Red   | 0.747000222  |
| 85 | BC023105      | Red   | 0.605373598  |
| 86 | Egr1          | Red   | 0.704399843  |
| 87 | Fos           | Red   | 0.695614744  |
| 88 | G530011O06Rik | Red   | 0.740456125  |
| 89 | Gm5346        | Red   | 0.657448885  |

|    |        |     |             |
|----|--------|-----|-------------|
| 90 | Gm5912 | Red | 0.651967258 |
| 91 | Murc   | Red | 1           |

**PC-corr network links weights and labels at cut-off 0.6**

| #  | Node i   | Node j          | PC-corr(i,j) |
|----|----------|-----------------|--------------|
| 1  | n-R5s180 | Gm22496         | 0.649040256  |
| 2  | n-R5s180 | Gm23579         | 0.721354661  |
| 3  | n-R5s180 | Gm14214         | 0.695256046  |
| 4  | n-R5s180 | Gm23254         | 0.706045559  |
| 5  | n-R5s180 | Gm22834         | 0.706677831  |
| 6  | n-R5s180 | LOC102632904    | 0.624550714  |
| 7  | n-R5s180 | Gm10921         | 0.600872277  |
| 8  | n-R5s180 | Gm22253         | 0.669850712  |
| 9  | n-R5s180 | Gm25648         | 0.600369722  |
| 10 | n-R5s180 | Gm23737         | 0.710045012  |
| 11 | n-R5s180 | Gm23922         | 0.658574808  |
| 12 | n-R5s180 | Lsm5            | 0.721354661  |
| 13 | n-R5s180 | Gm25098         | 0.656646706  |
| 14 | n-R5s180 | Gm25449         | 0.616392987  |
| 15 | n-R5s180 | Gm21732         | 0.644501631  |
| 16 | n-R5s180 | Gm25089         | 0.64846379   |
| 17 | n-R5s180 | Gm21882         | 0.666405984  |
| 18 | n-R5s180 | Gm23730         | 0.721354661  |
| 19 | n-R5s180 | Gm23305         | 0.664243567  |
| 20 | n-R5s180 | mt-Tt           | 0.721354661  |
| 21 | n-R5s180 | Gm20831         | 0.613856901  |
| 22 | n-R5s180 | Snord116        | 0.721354661  |
| 23 | n-R5s180 | mt-Tc           | 0.721354661  |
| 24 | n-R5s180 | Olfr166         | 0.63478488   |
| 25 | n-R5s180 | Snord116 // Ipw | 0.695183163  |
| 26 | n-R5s180 | Gm22510         | 0.625509447  |
| 27 | n-R5s180 | Rnu1b1          | 0.721354661  |
| 28 | n-R5s180 | Gm22155         | 0.721354661  |
| 29 | n-R5s180 | Olfr1231        | 0.618922514  |
| 30 | n-R5s180 | Gm4787          | 0.605277579  |
| 31 | n-R5s180 | Gm20806         | 0.603370638  |
| 32 | n-R5s180 | Ipw             | 0.679543558  |
| 33 | n-R5s180 | Olfr1034        | 0.662686071  |
| 34 | n-R5s180 | Gm21943         | 0.62432152   |
| 35 | n-R5s180 | LOC102640399    | 0.653001706  |
| 36 | n-R5s180 | Gm10375         | 0.616879434  |
| 37 | n-R5s180 | mt-Tf           | 0.721354661  |
| 38 | n-R5s180 | Gm23947         | 0.642276287  |
| 39 | n-R5s180 | Gm20815         | 0.624089122  |
| 40 | n-R5s180 | mt-Ts1          | 0.721354661  |
| 41 | n-R5s180 | mt-Ty           | 0.721354661  |
| 42 | n-R5s180 | Gm24624         | 0.601008593  |

|    |          |               |              |
|----|----------|---------------|--------------|
| 43 | n-R5s180 | LOC102633726  | 0.610520962  |
| 44 | n-R5s180 | Gm20747       | 0.607448307  |
| 45 | n-R5s180 | Trdn          | 0.662913558  |
| 46 | n-R5s180 | Snora74a      | 0.716709874  |
| 47 | n-R5s180 | mt-Ts2        | 0.721354661  |
| 48 | n-R5s180 | Gm22866       | 0.721354661  |
| 49 | n-R5s180 | Rnu12         | 0.714196988  |
| 50 | n-R5s180 | Ppp4r2        | 0.721354661  |
| 51 | n-R5s180 | Tmeff1        | 0.65030418   |
| 52 | n-R5s180 | Gm23928       | 0.602562509  |
| 53 | n-R5s180 | LOC102639563  | 0.612052689  |
| 54 | n-R5s180 | Vaultre5      | 0.721354661  |
| 55 | n-R5s180 | Inmt          | 0.646471019  |
| 56 | n-R5s180 | Fam107a       | 0.645410606  |
| 57 | n-R5s180 | mt-Tk         | 0.720414242  |
| 58 | n-R5s180 | Brox          | 0.657411274  |
| 59 | n-R5s180 | Glr3          | 0.616971069  |
| 60 | n-R5s180 | mt-Th         | 0.66178471   |
| 61 | n-R5s180 | Ddit4         | 0.63226978   |
| 62 | n-R5s180 | mt-Tp         | 0.667405111  |
| 63 | n-R5s180 | mt-Ta         | 0.680121023  |
| 64 | n-R5s180 | Mpv17         | -0.61068715  |
| 65 | n-R5s180 | Gm6245        | -0.638394295 |
| 66 | n-R5s180 | Cd59a         | -0.637322477 |
| 67 | n-R5s180 | Tmem159       | -0.60103159  |
| 68 | n-R5s180 | Acot2         | -0.679628534 |
| 69 | n-R5s180 | Dhdh          | -0.622508261 |
| 70 | n-R5s180 | Fam213a       | -0.643220229 |
| 71 | n-R5s180 | Nmnat1        | -0.605873152 |
| 72 | n-R5s180 | Coq5          | -0.677305385 |
| 73 | n-R5s180 | Tmem184c      | -0.651508083 |
| 74 | n-R5s180 | Nrn1          | -0.610300306 |
| 75 | n-R5s180 | Uprt          | -0.651921824 |
| 76 | n-R5s180 | Nsun3         | -0.673017501 |
| 77 | n-R5s180 | Gm10718       | -0.609800071 |
| 78 | n-R5s180 | Nr4a1         | -0.721354661 |
| 79 | n-R5s180 | Egr1          | -0.704399843 |
| 80 | n-R5s180 | Fos           | -0.695614744 |
| 81 | n-R5s180 | G530011O06Rik | -0.721354661 |
| 82 | n-R5s180 | Gm5346        | -0.657448885 |
| 83 | n-R5s180 | Gm5912        | -0.651967258 |
| 84 | n-R5s180 | Murc          | -0.721354661 |
| 85 | Gm22496  | Gm23579       | 0.649040256  |
| 86 | Gm22496  | Gm14214       | 0.649040256  |
| 87 | Gm22496  | Gm23254       | 0.649040256  |
| 88 | Gm22496  | Gm22834       | 0.649040256  |

|     |         |                 |             |
|-----|---------|-----------------|-------------|
| 89  | Gm22496 | LOC102632904    | 0.624550714 |
| 90  | Gm22496 | Gm10921         | 0.600872277 |
| 91  | Gm22496 | Gm22253         | 0.649040256 |
| 92  | Gm22496 | Gm25648         | 0.600369722 |
| 93  | Gm22496 | Gm23737         | 0.649040256 |
| 94  | Gm22496 | Gm23922         | 0.649040256 |
| 95  | Gm22496 | Lsm5            | 0.649040256 |
| 96  | Gm22496 | Gm25098         | 0.649040256 |
| 97  | Gm22496 | Gm25449         | 0.616392987 |
| 98  | Gm22496 | Gm21732         | 0.644501631 |
| 99  | Gm22496 | Gm25089         | 0.64846379  |
| 100 | Gm22496 | Gm21882         | 0.649040256 |
| 101 | Gm22496 | Gm23730         | 0.649040256 |
| 102 | Gm22496 | Gm23305         | 0.649040256 |
| 103 | Gm22496 | mt-Tt           | 0.649040256 |
| 104 | Gm22496 | Gm20831         | 0.613856901 |
| 105 | Gm22496 | Snord116        | 0.649040256 |
| 106 | Gm22496 | mt-Tc           | 0.649040256 |
| 107 | Gm22496 | Olfr166         | 0.63478488  |
| 108 | Gm22496 | Snord116 // Ipw | 0.649040256 |
| 109 | Gm22496 | Gm22510         | 0.625509447 |
| 110 | Gm22496 | Rnu1b1          | 0.649040256 |
| 111 | Gm22496 | Gm22155         | 0.649040256 |
| 112 | Gm22496 | Olfr1231        | 0.618922514 |
| 113 | Gm22496 | Gm20806         | 0.603370638 |
| 114 | Gm22496 | Ipw             | 0.649040256 |
| 115 | Gm22496 | Olfr1034        | 0.649040256 |
| 116 | Gm22496 | Gm21943         | 0.62432152  |
| 117 | Gm22496 | LOC102640399    | 0.649040256 |
| 118 | Gm22496 | mt-Tf           | 0.649040256 |
| 119 | Gm22496 | Gm20815         | 0.624089122 |
| 120 | Gm22496 | mt-Ts1          | 0.649040256 |
| 121 | Gm22496 | mt-Ty           | 0.649040256 |
| 122 | Gm22496 | Gm24624         | 0.601008593 |
| 123 | Gm22496 | LOC102633726    | 0.610520962 |
| 124 | Gm22496 | Gm20747         | 0.607448307 |
| 125 | Gm22496 | Snora74a        | 0.649040256 |
| 126 | Gm22496 | mt-Ts2          | 0.649040256 |
| 127 | Gm22496 | Gm22866         | 0.649040256 |
| 128 | Gm22496 | Rnu12           | 0.649040256 |
| 129 | Gm22496 | Tmeff1          | 0.649040256 |
| 130 | Gm22496 | Gm23928         | 0.602562509 |
| 131 | Gm22496 | LOC102639563    | 0.612052689 |
| 132 | Gm22496 | Vaultrc5        | 0.649040256 |
| 133 | Gm22496 | Inmt            | 0.646471019 |
| 134 | Gm22496 | Fam107a         | 0.645410606 |



|     |         |              |              |
|-----|---------|--------------|--------------|
| 135 | Gm22496 | mt-Tk        | 0.649040256  |
| 136 | Gm22496 | Glrx3        | 0.616971069  |
| 137 | Gm22496 | mt-Th        | 0.649040256  |
| 138 | Gm22496 | Ddit4        | 0.63226978   |
| 139 | Gm22496 | mt-Tp        | 0.649040256  |
| 140 | Gm22496 | mt-Ta        | 0.649040256  |
| 141 | Gm22496 | Mpv17        | -0.61068715  |
| 142 | Gm22496 | Gm6245       | -0.638394295 |
| 143 | Gm22496 | Cd59a        | -0.637322477 |
| 144 | Gm22496 | Tmem159      | -0.60103159  |
| 145 | Gm22496 | Acot2        | -0.649040256 |
| 146 | Gm22496 | Dhdh         | -0.622508261 |
| 147 | Gm22496 | Fam213a      | -0.643220229 |
| 148 | Gm22496 | Nmnat1       | -0.605873152 |
| 149 | Gm22496 | Coq5         | -0.649040256 |
| 150 | Gm22496 | Tmem184c     | -0.649040256 |
| 151 | Gm22496 | Nrn1         | -0.610300306 |
| 152 | Gm22496 | Uppt         | -0.649040256 |
| 153 | Gm22496 | Nsun3        | -0.649040256 |
| 154 | Gm22496 | Gm10718      | -0.609800071 |
| 155 | Gm22496 | Nr4a1        | -0.649040256 |
| 156 | Gm22496 | Egr1         | -0.649040256 |
| 157 | Gm22496 | Fos          | -0.649040256 |
| 158 | Gm22496 | Gm5912       | -0.649040256 |
| 159 | Gm22496 | Murc         | -0.649040256 |
| 160 | Gm23579 | Gm14214      | 0.695256046  |
| 161 | Gm23579 | Gm23254      | 0.706045559  |
| 162 | Gm23579 | Gm22834      | 0.706677831  |
| 163 | Gm23579 | LOC102632904 | 0.624550714  |
| 164 | Gm23579 | Gm10921      | 0.600872277  |
| 165 | Gm23579 | Gm22253      | 0.669850712  |
| 166 | Gm23579 | Gm25648      | 0.600369722  |
| 167 | Gm23579 | Gm23737      | 0.71365871   |
| 168 | Gm23579 | Gm23922      | 0.658574808  |
| 169 | Gm23579 | Lsm5         | 0.712042989  |
| 170 | Gm23579 | Gm25098      | 0.656646706  |
| 171 | Gm23579 | Gm25449      | 0.616392987  |
| 172 | Gm23579 | Gm21732      | 0.644501631  |
| 173 | Gm23579 | Gm25089      | 0.64846379   |
| 174 | Gm23579 | Gm21882      | 0.666405984  |
| 175 | Gm23579 | Gm23730      | 0.726798019  |
| 176 | Gm23579 | Gm23305      | 0.664243567  |
| 177 | Gm23579 | mt-Tt        | 0.772801792  |
| 178 | Gm23579 | Gm20831      | 0.613856901  |
| 179 | Gm23579 | Snord116     | 0.725166274  |
| 180 | Gm23579 | mt-Tc        | 0.772801792  |

|     |         |                 |              |
|-----|---------|-----------------|--------------|
| 181 | Gm23579 | Olfr166         | 0.63478488   |
| 182 | Gm23579 | Snord116 // Ipw | 0.695183163  |
| 183 | Gm23579 | Gm22510         | 0.625509447  |
| 184 | Gm23579 | Rnu1b1          | 0.772801792  |
| 185 | Gm23579 | Gm22155         | 0.753346542  |
| 186 | Gm23579 | Olfr1231        | 0.618922514  |
| 187 | Gm23579 | Gm20806         | 0.603370638  |
| 188 | Gm23579 | Ipw             | 0.679543558  |
| 189 | Gm23579 | Olfr1034        | 0.662686071  |
| 190 | Gm23579 | Gm21943         | 0.62432152   |
| 191 | Gm23579 | LOC102640399    | 0.653001706  |
| 192 | Gm23579 | mt-Tf           | 0.772801792  |
| 193 | Gm23579 | Gm23947         | 0.603435569  |
| 194 | Gm23579 | Gm20815         | 0.624089122  |
| 195 | Gm23579 | mt-Ts1          | 0.772801792  |
| 196 | Gm23579 | mt-Ty           | 0.772801792  |
| 197 | Gm23579 | Gm24624         | 0.601008593  |
| 198 | Gm23579 | LOC102633726    | 0.610520962  |
| 199 | Gm23579 | Gm20747         | 0.607448307  |
| 200 | Gm23579 | Snora74a        | 0.716709874  |
| 201 | Gm23579 | mt-Ts2          | 0.772801792  |
| 202 | Gm23579 | Gm22866         | 0.772801792  |
| 203 | Gm23579 | Rnu12           | 0.714196988  |
| 204 | Gm23579 | Tmeff1          | 0.65030418   |
| 205 | Gm23579 | Gm23928         | 0.602562509  |
| 206 | Gm23579 | LOC102639563    | 0.612052689  |
| 207 | Gm23579 | Vaultrc5        | 0.728238836  |
| 208 | Gm23579 | Inmt            | 0.646471019  |
| 209 | Gm23579 | Fam107a         | 0.645410606  |
| 210 | Gm23579 | mt-Tk           | 0.720414242  |
| 211 | Gm23579 | Glr3            | 0.616971069  |
| 212 | Gm23579 | mt-Th           | 0.66178471   |
| 213 | Gm23579 | Ddit4           | 0.63226978   |
| 214 | Gm23579 | mt-Tp           | 0.667405111  |
| 215 | Gm23579 | mt-Ta           | 0.680121023  |
| 216 | Gm23579 | Mpv17           | -0.61068715  |
| 217 | Gm23579 | Gm6245          | -0.638394295 |
| 218 | Gm23579 | Cd59a           | -0.637322477 |
| 219 | Gm23579 | Tmem159         | -0.60103159  |
| 220 | Gm23579 | Acot2           | -0.679628534 |
| 221 | Gm23579 | Dhdh            | -0.622508261 |
| 222 | Gm23579 | Fam213a         | -0.643220229 |
| 223 | Gm23579 | Nmnat1          | -0.605873152 |
| 224 | Gm23579 | Coq5            | -0.677305385 |
| 225 | Gm23579 | Tmem184c        | -0.651508083 |
| 226 | Gm23579 | Nrn1            | -0.610300306 |

|     |         |                 |              |
|-----|---------|-----------------|--------------|
| 227 | Gm23579 | Uprt            | -0.651921824 |
| 228 | Gm23579 | Nsun3           | -0.673017501 |
| 229 | Gm23579 | Gm10718         | -0.609800071 |
| 230 | Gm23579 | Nr4a1           | -0.747000222 |
| 231 | Gm23579 | BC023105        | -0.604280515 |
| 232 | Gm23579 | Egr1            | -0.675938407 |
| 233 | Gm23579 | Fos             | -0.695614744 |
| 234 | Gm23579 | G530011O06Rik   | -0.647570736 |
| 235 | Gm23579 | Gm5346          | -0.641654659 |
| 236 | Gm23579 | Gm5912          | -0.651967258 |
| 237 | Gm23579 | Murc            | -0.772801792 |
| 238 | Gm14214 | Gm23614         | 0.603048538  |
| 239 | Gm14214 | Gm23254         | 0.695256046  |
| 240 | Gm14214 | Gm22834         | 0.695256046  |
| 241 | Gm14214 | LOC102632904    | 0.624550714  |
| 242 | Gm14214 | Gm10921         | 0.600872277  |
| 243 | Gm14214 | Gm22253         | 0.669850712  |
| 244 | Gm14214 | Gm25648         | 0.600369722  |
| 245 | Gm14214 | Gm23737         | 0.695256046  |
| 246 | Gm14214 | Gm23922         | 0.658574808  |
| 247 | Gm14214 | Gm25098         | 0.656646706  |
| 248 | Gm14214 | Gm25449         | 0.616392987  |
| 249 | Gm14214 | Gm21732         | 0.644501631  |
| 250 | Gm14214 | Gm25089         | 0.64846379   |
| 251 | Gm14214 | Gm21882         | 0.666405984  |
| 252 | Gm14214 | Gm23730         | 0.695256046  |
| 253 | Gm14214 | Gm23305         | 0.664243567  |
| 254 | Gm14214 | mt-Tt           | 0.695256046  |
| 255 | Gm14214 | Gm20831         | 0.613856901  |
| 256 | Gm14214 | Snord116        | 0.695256046  |
| 257 | Gm14214 | mt-Tc           | 0.695256046  |
| 258 | Gm14214 | Olfr166         | 0.619866273  |
| 259 | Gm14214 | Snord116 // Ipw | 0.695183163  |
| 260 | Gm14214 | Rnu1b1          | 0.695256046  |
| 261 | Gm14214 | Gm22155         | 0.695256046  |
| 262 | Gm14214 | Olfr1231        | 0.618922514  |
| 263 | Gm14214 | Gm4787          | 0.605277579  |
| 264 | Gm14214 | Gm20806         | 0.603370638  |
| 265 | Gm14214 | Ipw             | 0.679543558  |
| 266 | Gm14214 | Olfr1034        | 0.662686071  |
| 267 | Gm14214 | Gm21943         | 0.62432152   |
| 268 | Gm14214 | LOC102640399    | 0.653001706  |
| 269 | Gm14214 | Gm10375         | 0.616879434  |
| 270 | Gm14214 | mt-Tf           | 0.695256046  |
| 271 | Gm14214 | Gm23947         | 0.642276287  |
| 272 | Gm14214 | Gm20815         | 0.624089122  |

|     |         |              |              |
|-----|---------|--------------|--------------|
| 273 | Gm14214 | mt-Ts1       | 0.695256046  |
| 274 | Gm14214 | mt-Ty        | 0.695256046  |
| 275 | Gm14214 | Gm24624      | 0.601008593  |
| 276 | Gm14214 | LOC102633726 | 0.610520962  |
| 277 | Gm14214 | Gm20747      | 0.607448307  |
| 278 | Gm14214 | Trdn         | 0.662913558  |
| 279 | Gm14214 | Snora74a     | 0.695256046  |
| 280 | Gm14214 | mt-Ts2       | 0.695256046  |
| 281 | Gm14214 | Gm22866      | 0.695256046  |
| 282 | Gm14214 | Rnu12        | 0.695256046  |
| 283 | Gm14214 | Ppp4r2       | 0.680706606  |
| 284 | Gm14214 | Gm22749      | 0.634337211  |
| 285 | Gm14214 | Tmeff1       | 0.65030418   |
| 286 | Gm14214 | Gm23928      | 0.602562509  |
| 287 | Gm14214 | LOC102639563 | 0.612052689  |
| 288 | Gm14214 | Vaultre5     | 0.695256046  |
| 289 | Gm14214 | Inmt         | 0.646471019  |
| 290 | Gm14214 | mt-Tk        | 0.695256046  |
| 291 | Gm14214 | Brox         | 0.657411274  |
| 292 | Gm14214 | Glx3         | 0.616971069  |
| 293 | Gm14214 | mt-Th        | 0.66178471   |
| 294 | Gm14214 | mt-Tp        | 0.667405111  |
| 295 | Gm14214 | mt-Ta        | 0.680121023  |
| 296 | Gm14214 | Mpv17        | -0.61068715  |
| 297 | Gm14214 | Gm6245       | -0.638394295 |
| 298 | Gm14214 | Cd59a        | -0.637322477 |
| 299 | Gm14214 | Tmem159      | -0.60103159  |
| 300 | Gm14214 | Acot2        | -0.679628534 |
| 301 | Gm14214 | Dhdh         | -0.622508261 |
| 302 | Gm14214 | Fam213a      | -0.643220229 |
| 303 | Gm14214 | Nmnat1       | -0.605873152 |
| 304 | Gm14214 | Coq5         | -0.677305385 |
| 305 | Gm14214 | Tmem184c     | -0.651508083 |
| 306 | Gm14214 | Nrn1         | -0.610300306 |
| 307 | Gm14214 | Uppt         | -0.651921824 |
| 308 | Gm14214 | Nsun3        | -0.673017501 |
| 309 | Gm14214 | Gm10718      | -0.609800071 |
| 310 | Gm14214 | BC023105     | -0.605373598 |
| 311 | Gm14214 | Gm5346       | -0.657448885 |
| 312 | Gm14214 | Gm5912       | -0.651967258 |
| 313 | Gm14214 | Murc         | -0.695256046 |
| 314 | Gm23614 | LOC102632904 | 0.603048538  |
| 315 | Gm23614 | Myl7         | 0.603048538  |
| 316 | Gm23614 | Gm22253      | 0.603048538  |
| 317 | Gm23614 | Gm25098      | 0.603048538  |
| 318 | Gm23614 | Gm21732      | 0.603048538  |

|     |         |                 |              |
|-----|---------|-----------------|--------------|
| 319 | Gm23614 | Gm25089         | 0.603048538  |
| 320 | Gm23614 | Gm21882         | 0.603048538  |
| 321 | Gm23614 | Gm23305         | 0.603048538  |
| 322 | Gm23614 | Myl4            | 0.603048538  |
| 323 | Gm23614 | Gm20806         | 0.603048538  |
| 324 | Gm23614 | Gm21943         | 0.603048538  |
| 325 | Gm23614 | Gm23947         | 0.603048538  |
| 326 | Gm23614 | Gm20815         | 0.603048538  |
| 327 | Gm23614 | Gm20747         | 0.603048538  |
| 328 | Gm23614 | Tmeff1          | 0.603048538  |
| 329 | Gm23614 | Cd59a           | -0.603048538 |
| 330 | Gm23614 | BC023105        | -0.603048538 |
| 331 | Gm23254 | Gm22834         | 0.706045559  |
| 332 | Gm23254 | LOC102632904    | 0.624550714  |
| 333 | Gm23254 | Gm10921         | 0.600872277  |
| 334 | Gm23254 | Gm22253         | 0.669850712  |
| 335 | Gm23254 | Gm25648         | 0.600369722  |
| 336 | Gm23254 | Gm23737         | 0.706045559  |
| 337 | Gm23254 | Gm23922         | 0.658574808  |
| 338 | Gm23254 | Lsm5            | 0.626818399  |
| 339 | Gm23254 | Gm25098         | 0.656646706  |
| 340 | Gm23254 | Gm25449         | 0.616392987  |
| 341 | Gm23254 | Gm21732         | 0.644501631  |
| 342 | Gm23254 | Gm25089         | 0.64846379   |
| 343 | Gm23254 | Gm21882         | 0.666405984  |
| 344 | Gm23254 | Gm23730         | 0.706045559  |
| 345 | Gm23254 | Gm23305         | 0.664243567  |
| 346 | Gm23254 | mt-Tt           | 0.706045559  |
| 347 | Gm23254 | Gm20831         | 0.613856901  |
| 348 | Gm23254 | Snord116        | 0.706045559  |
| 349 | Gm23254 | mt-Tc           | 0.706045559  |
| 350 | Gm23254 | Olfr166         | 0.63478488   |
| 351 | Gm23254 | Snord116 // Ipw | 0.695183163  |
| 352 | Gm23254 | Gm22510         | 0.625509447  |
| 353 | Gm23254 | Rnu1b1          | 0.706045559  |
| 354 | Gm23254 | Gm22155         | 0.706045559  |
| 355 | Gm23254 | Olfr1231        | 0.618922514  |
| 356 | Gm23254 | Gm20806         | 0.603370638  |
| 357 | Gm23254 | Ipw             | 0.679543558  |
| 358 | Gm23254 | Olfr1034        | 0.662686071  |
| 359 | Gm23254 | Gm21943         | 0.62432152   |
| 360 | Gm23254 | LOC102640399    | 0.653001706  |
| 361 | Gm23254 | mt-Tf           | 0.706045559  |
| 362 | Gm23254 | Gm23947         | 0.642046792  |
| 363 | Gm23254 | Gm20815         | 0.624089122  |
| 364 | Gm23254 | mt-Ts1          | 0.706045559  |

|     |         |              |              |
|-----|---------|--------------|--------------|
| 365 | Gm23254 | mt-Ty        | 0.706045559  |
| 366 | Gm23254 | Gm24624      | 0.601008593  |
| 367 | Gm23254 | LOC102633726 | 0.610520962  |
| 368 | Gm23254 | Gm20747      | 0.607448307  |
| 369 | Gm23254 | Snora74a     | 0.706045559  |
| 370 | Gm23254 | mt-Ts2       | 0.706045559  |
| 371 | Gm23254 | Gm22866      | 0.706045559  |
| 372 | Gm23254 | Rnu12        | 0.706045559  |
| 373 | Gm23254 | Tmeff1       | 0.65030418   |
| 374 | Gm23254 | Gm23928      | 0.602562509  |
| 375 | Gm23254 | LOC102639563 | 0.612052689  |
| 376 | Gm23254 | Vaultre5     | 0.706045559  |
| 377 | Gm23254 | Inmt         | 0.646471019  |
| 378 | Gm23254 | Fam107a      | 0.645410606  |
| 379 | Gm23254 | mt-Tk        | 0.706045559  |
| 380 | Gm23254 | Glr3         | 0.616971069  |
| 381 | Gm23254 | mt-Th        | 0.66178471   |
| 382 | Gm23254 | Ddit4        | 0.63226978   |
| 383 | Gm23254 | mt-Tp        | 0.667405111  |
| 384 | Gm23254 | mt-Ta        | 0.680121023  |
| 385 | Gm23254 | Mpv17        | -0.61068715  |
| 386 | Gm23254 | Gm6245       | -0.638394295 |
| 387 | Gm23254 | Cd59a        | -0.637322477 |
| 388 | Gm23254 | Tmem159      | -0.60103159  |
| 389 | Gm23254 | Acot2        | -0.679628534 |
| 390 | Gm23254 | Dhdh         | -0.622508261 |
| 391 | Gm23254 | Fam213a      | -0.643220229 |
| 392 | Gm23254 | Nmnat1       | -0.605873152 |
| 393 | Gm23254 | Coq5         | -0.677305385 |
| 394 | Gm23254 | Tmem184c     | -0.651508083 |
| 395 | Gm23254 | Nrn1         | -0.610300306 |
| 396 | Gm23254 | Uprt         | -0.651921824 |
| 397 | Gm23254 | Nsun3        | -0.673017501 |
| 398 | Gm23254 | Gm10718      | -0.609800071 |
| 399 | Gm23254 | Nr4a1        | -0.706045559 |
| 400 | Gm23254 | BC023105     | -0.605373598 |
| 401 | Gm23254 | Egr1         | -0.601654027 |
| 402 | Gm23254 | Fos          | -0.642685168 |
| 403 | Gm23254 | Gm5912       | -0.651967258 |
| 404 | Gm23254 | Murc         | -0.706045559 |
| 405 | Gm22834 | LOC102632904 | 0.624550714  |
| 406 | Gm22834 | Gm10921      | 0.600872277  |
| 407 | Gm22834 | Gm22253      | 0.669850712  |
| 408 | Gm22834 | Gm25648      | 0.600369722  |
| 409 | Gm22834 | Gm23737      | 0.706677831  |
| 410 | Gm22834 | Gm23922      | 0.658574808  |

|     |         |                 |             |
|-----|---------|-----------------|-------------|
| 411 | Gm22834 | Lsm5            | 0.671102514 |
| 412 | Gm22834 | Gm25098         | 0.656646706 |
| 413 | Gm22834 | Gm25449         | 0.616392987 |
| 414 | Gm22834 | Gm21732         | 0.644501631 |
| 415 | Gm22834 | Gm25089         | 0.64846379  |
| 416 | Gm22834 | Gm21882         | 0.666405984 |
| 417 | Gm22834 | Gm23730         | 0.706677831 |
| 418 | Gm22834 | Gm23305         | 0.664243567 |
| 419 | Gm22834 | mt-Tt           | 0.706677831 |
| 420 | Gm22834 | Gm20831         | 0.613856901 |
| 421 | Gm22834 | Snord116        | 0.706677831 |
| 422 | Gm22834 | mt-Tc           | 0.706677831 |
| 423 | Gm22834 | Olfr166         | 0.63478488  |
| 424 | Gm22834 | Snord116 // Ipw | 0.695183163 |
| 425 | Gm22834 | Gm22510         | 0.625509447 |
| 426 | Gm22834 | Rnu1b1          | 0.706677831 |
| 427 | Gm22834 | Gm22155         | 0.706677831 |
| 428 | Gm22834 | Olfr1231        | 0.618922514 |
| 429 | Gm22834 | Gm20806         | 0.603370638 |
| 430 | Gm22834 | Ipw             | 0.679543558 |
| 431 | Gm22834 | Olfr1034        | 0.662686071 |
| 432 | Gm22834 | Gm21943         | 0.62432152  |
| 433 | Gm22834 | LOC102640399    | 0.653001706 |
| 434 | Gm22834 | mt-Tf           | 0.706677831 |
| 435 | Gm22834 | Gm20815         | 0.624089122 |
| 436 | Gm22834 | mt-Ts1          | 0.706677831 |
| 437 | Gm22834 | mt-Ty           | 0.706677831 |
| 438 | Gm22834 | Gm24624         | 0.601008593 |
| 439 | Gm22834 | LOC102633726    | 0.610520962 |
| 440 | Gm22834 | Gm20747         | 0.607448307 |
| 441 | Gm22834 | Snora74a        | 0.706677831 |
| 442 | Gm22834 | mt-Ts2          | 0.706677831 |
| 443 | Gm22834 | Gm22866         | 0.706677831 |
| 444 | Gm22834 | Rnu12           | 0.706677831 |
| 445 | Gm22834 | Tmeff1          | 0.65030418  |
| 446 | Gm22834 | Gm23928         | 0.602562509 |
| 447 | Gm22834 | LOC102639563    | 0.612052689 |
| 448 | Gm22834 | Vaultre5        | 0.706677831 |
| 449 | Gm22834 | Inmt            | 0.646471019 |
| 450 | Gm22834 | Fam107a         | 0.606896022 |
| 451 | Gm22834 | mt-Tk           | 0.706677831 |
| 452 | Gm22834 | Glr3            | 0.616971069 |
| 453 | Gm22834 | mt-Th           | 0.66178471  |
| 454 | Gm22834 | Ddit4           | 0.63226978  |
| 455 | Gm22834 | mt-Tp           | 0.667405111 |
| 456 | Gm22834 | mt-Ta           | 0.680121023 |

|     |              |                 |              |
|-----|--------------|-----------------|--------------|
| 457 | Gm22834      | Mpv17           | -0.61068715  |
| 458 | Gm22834      | Gm6245          | -0.638394295 |
| 459 | Gm22834      | Cd59a           | -0.637322477 |
| 460 | Gm22834      | Tmem159         | -0.60103159  |
| 461 | Gm22834      | Acot2           | -0.679628534 |
| 462 | Gm22834      | Dhdh            | -0.622508261 |
| 463 | Gm22834      | Fam213a         | -0.643220229 |
| 464 | Gm22834      | Nmnat1          | -0.605873152 |
| 465 | Gm22834      | Coq5            | -0.677305385 |
| 466 | Gm22834      | Tmem184c        | -0.602643594 |
| 467 | Gm22834      | Nrn1            | -0.610300306 |
| 468 | Gm22834      | Uprt            | -0.651921824 |
| 469 | Gm22834      | Nsun3           | -0.673017501 |
| 470 | Gm22834      | Gm10718         | -0.609800071 |
| 471 | Gm22834      | Nr4a1           | -0.694049455 |
| 472 | Gm22834      | BC023105        | -0.605373598 |
| 473 | Gm22834      | Egr1            | -0.601195826 |
| 474 | Gm22834      | Fos             | -0.642161087 |
| 475 | Gm22834      | Gm5912          | -0.651967258 |
| 476 | Gm22834      | Murc            | -0.706677831 |
| 477 | LOC102632904 | Myl7            | 0.624550714  |
| 478 | LOC102632904 | Gm10921         | 0.600872277  |
| 479 | LOC102632904 | Gm22253         | 0.624550714  |
| 480 | LOC102632904 | Gm25648         | 0.600369722  |
| 481 | LOC102632904 | Gm23737         | 0.624550714  |
| 482 | LOC102632904 | Gm23922         | 0.624550714  |
| 483 | LOC102632904 | Gm25098         | 0.624550714  |
| 484 | LOC102632904 | Gm25449         | 0.616392987  |
| 485 | LOC102632904 | Gm21732         | 0.624550714  |
| 486 | LOC102632904 | Gm25089         | 0.624550714  |
| 487 | LOC102632904 | Gm21882         | 0.624550714  |
| 488 | LOC102632904 | Gm23730         | 0.624550714  |
| 489 | LOC102632904 | Gm23305         | 0.624550714  |
| 490 | LOC102632904 | mt-Tt           | 0.624550714  |
| 491 | LOC102632904 | Gm20831         | 0.613856901  |
| 492 | LOC102632904 | Snord116        | 0.624550714  |
| 493 | LOC102632904 | mt-Tc           | 0.624550714  |
| 494 | LOC102632904 | Olf166          | 0.624550714  |
| 495 | LOC102632904 | Snord116 // Ipw | 0.624550714  |
| 496 | LOC102632904 | Gm22510         | 0.624550714  |
| 497 | LOC102632904 | Rnu1b1          | 0.624550714  |
| 498 | LOC102632904 | Gm22155         | 0.624550714  |
| 499 | LOC102632904 | Olf1231         | 0.618922514  |
| 500 | LOC102632904 | Gm20806         | 0.603370638  |
| 501 | LOC102632904 | Ipw             | 0.624550714  |
| 502 | LOC102632904 | Olf1034         | 0.624550714  |



|     |              |              |              |
|-----|--------------|--------------|--------------|
| 503 | LOC102632904 | Gm21943      | 0.62432152   |
| 504 | LOC102632904 | LOC102640399 | 0.624550714  |
| 505 | LOC102632904 | mt-Tf        | 0.624550714  |
| 506 | LOC102632904 | Gm23947      | 0.624550714  |
| 507 | LOC102632904 | Gm20815      | 0.624089122  |
| 508 | LOC102632904 | mt-Ts1       | 0.624550714  |
| 509 | LOC102632904 | mt-Ty        | 0.624550714  |
| 510 | LOC102632904 | Gm24624      | 0.601008593  |
| 511 | LOC102632904 | LOC102633726 | 0.610520962  |
| 512 | LOC102632904 | Gm20747      | 0.607448307  |
| 513 | LOC102632904 | Snora74a     | 0.624550714  |
| 514 | LOC102632904 | mt-Ts2       | 0.624550714  |
| 515 | LOC102632904 | Gm22866      | 0.624550714  |
| 516 | LOC102632904 | Rnu12        | 0.624550714  |
| 517 | LOC102632904 | Tmeff1       | 0.624550714  |
| 518 | LOC102632904 | Gm23928      | 0.602562509  |
| 519 | LOC102632904 | LOC102639563 | 0.612052689  |
| 520 | LOC102632904 | Vaultre5     | 0.624550714  |
| 521 | LOC102632904 | Inmt         | 0.624550714  |
| 522 | LOC102632904 | mt-Tk        | 0.624550714  |
| 523 | LOC102632904 | Glr3         | 0.616971069  |
| 524 | LOC102632904 | mt-Th        | 0.624550714  |
| 525 | LOC102632904 | Ddit4        | 0.624550714  |
| 526 | LOC102632904 | mt-Tp        | 0.624550714  |
| 527 | LOC102632904 | mt-Ta        | 0.624550714  |
| 528 | LOC102632904 | Mpv17        | -0.61068715  |
| 529 | LOC102632904 | Gm6245       | -0.624550714 |
| 530 | LOC102632904 | Cd59a        | -0.624550714 |
| 531 | LOC102632904 | Tmem159      | -0.60103159  |
| 532 | LOC102632904 | Acot2        | -0.624550714 |
| 533 | LOC102632904 | Dhdh         | -0.622508261 |
| 534 | LOC102632904 | Fam213a      | -0.624550714 |
| 535 | LOC102632904 | Nmnat1       | -0.605873152 |
| 536 | LOC102632904 | Coq5         | -0.624550714 |
| 537 | LOC102632904 | Tmem184c     | -0.624550714 |
| 538 | LOC102632904 | Nrn1         | -0.610300306 |
| 539 | LOC102632904 | Uprt         | -0.624550714 |
| 540 | LOC102632904 | Nsun3        | -0.624550714 |
| 541 | LOC102632904 | Gm10718      | -0.609800071 |
| 542 | LOC102632904 | BC023105     | -0.605373598 |
| 543 | LOC102632904 | Gm5912       | -0.624550714 |
| 544 | LOC102632904 | Murc         | -0.624550714 |
| 545 | Myl7         | Gm25648      | 0.600369722  |
| 546 | Myl7         | Gm23922      | 0.616526462  |
| 547 | Myl7         | Gm25449      | 0.616392987  |
| 548 | Myl7         | Gm21732      | 0.644501631  |

|     |         |                 |              |
|-----|---------|-----------------|--------------|
| 549 | Myl7    | Gm25089         | 0.64846379   |
| 550 | Myl7    | Gm21882         | 0.628419398  |
| 551 | Myl7    | Gm22510         | 0.625509447  |
| 552 | Myl7    | Myl4            | 0.642387625  |
| 553 | Myl7    | Gm20815         | 0.624089122  |
| 554 | Myl7    | Gm20747         | 0.607448307  |
| 555 | Myl7    | Gm10718         | -0.609800071 |
| 556 | Gm10921 | Gm22253         | 0.600872277  |
| 557 | Gm10921 | Gm25648         | 0.600369722  |
| 558 | Gm10921 | Gm23737         | 0.600872277  |
| 559 | Gm10921 | Gm23922         | 0.600872277  |
| 560 | Gm10921 | Lsm5            | 0.600872277  |
| 561 | Gm10921 | Gm25098         | 0.600872277  |
| 562 | Gm10921 | Gm25449         | 0.600872277  |
| 563 | Gm10921 | Gm21732         | 0.600872277  |
| 564 | Gm10921 | Gm25089         | 0.600872277  |
| 565 | Gm10921 | Gm21882         | 0.600872277  |
| 566 | Gm10921 | Gm23730         | 0.600872277  |
| 567 | Gm10921 | Gm23305         | 0.600872277  |
| 568 | Gm10921 | mt-Tt           | 0.600872277  |
| 569 | Gm10921 | Gm20831         | 0.600872277  |
| 570 | Gm10921 | Snord116        | 0.600872277  |
| 571 | Gm10921 | mt-Tc           | 0.600872277  |
| 572 | Gm10921 | Olfr166         | 0.600872277  |
| 573 | Gm10921 | Snord116 // Ipw | 0.600872277  |
| 574 | Gm10921 | Gm22510         | 0.600872277  |
| 575 | Gm10921 | Rnu1b1          | 0.600872277  |
| 576 | Gm10921 | Gm22155         | 0.600872277  |
| 577 | Gm10921 | Olfr1231        | 0.600872277  |
| 578 | Gm10921 | Gm4787          | 0.600872277  |
| 579 | Gm10921 | Gm20806         | 0.600872277  |
| 580 | Gm10921 | Ipw             | 0.600872277  |
| 581 | Gm10921 | Olfr1034        | 0.600872277  |
| 582 | Gm10921 | Gm21943         | 0.600872277  |
| 583 | Gm10921 | LOC102640399    | 0.600872277  |
| 584 | Gm10921 | Gm10375         | 0.600872277  |
| 585 | Gm10921 | mt-Tf           | 0.600872277  |
| 586 | Gm10921 | Gm23947         | 0.600872277  |
| 587 | Gm10921 | Gm20815         | 0.600872277  |
| 588 | Gm10921 | mt-Ts1          | 0.600872277  |
| 589 | Gm10921 | mt-Ty           | 0.600872277  |
| 590 | Gm10921 | Gm24624         | 0.600872277  |
| 591 | Gm10921 | LOC102633726    | 0.600872277  |
| 592 | Gm10921 | Gm20747         | 0.600872277  |
| 593 | Gm10921 | Trdn            | 0.600872277  |
| 594 | Gm10921 | Snora74a        | 0.600872277  |

|     |         |               |              |
|-----|---------|---------------|--------------|
| 595 | Gm10921 | mt-Ts2        | 0.600872277  |
| 596 | Gm10921 | Gm22866       | 0.600872277  |
| 597 | Gm10921 | Rnu12         | 0.600872277  |
| 598 | Gm10921 | Tmeff1        | 0.600872277  |
| 599 | Gm10921 | Gm23928       | 0.600872277  |
| 600 | Gm10921 | LOC102639563  | 0.600872277  |
| 601 | Gm10921 | Vaultc5       | 0.600872277  |
| 602 | Gm10921 | Inmt          | 0.600872277  |
| 603 | Gm10921 | Fam107a       | 0.600872277  |
| 604 | Gm10921 | mt-Tk         | 0.600872277  |
| 605 | Gm10921 | Brox          | 0.600872277  |
| 606 | Gm10921 | Glr3          | 0.600872277  |
| 607 | Gm10921 | mt-Th         | 0.600872277  |
| 608 | Gm10921 | Ddit4         | 0.600872277  |
| 609 | Gm10921 | mt-Tp         | 0.600872277  |
| 610 | Gm10921 | mt-Ta         | 0.600872277  |
| 611 | Gm10921 | Mpv17         | -0.600872277 |
| 612 | Gm10921 | Gm6245        | -0.600872277 |
| 613 | Gm10921 | Cd59a         | -0.600872277 |
| 614 | Gm10921 | Tmem159       | -0.600872277 |
| 615 | Gm10921 | Acot2         | -0.600872277 |
| 616 | Gm10921 | Dhdh          | -0.600872277 |
| 617 | Gm10921 | Fam213a       | -0.600872277 |
| 618 | Gm10921 | Nmnat1        | -0.600872277 |
| 619 | Gm10921 | Coq5          | -0.600872277 |
| 620 | Gm10921 | Tmem184c      | -0.600872277 |
| 621 | Gm10921 | Nrn1          | -0.600872277 |
| 622 | Gm10921 | Uprt          | -0.600872277 |
| 623 | Gm10921 | Nsun3         | -0.600872277 |
| 624 | Gm10921 | Gm10718       | -0.600872277 |
| 625 | Gm10921 | Nr4a1         | -0.600872277 |
| 626 | Gm10921 | BC023105      | -0.600872277 |
| 627 | Gm10921 | Egr1          | -0.600872277 |
| 628 | Gm10921 | Fos           | -0.600872277 |
| 629 | Gm10921 | G530011O06Rik | -0.600872277 |
| 630 | Gm10921 | Gm5346        | -0.600872277 |
| 631 | Gm10921 | Gm5912        | -0.600872277 |
| 632 | Gm10921 | Murc          | -0.600872277 |
| 633 | Gm22253 | Gm25648       | 0.600369722  |
| 634 | Gm22253 | Gm23737       | 0.669850712  |
| 635 | Gm22253 | Gm23922       | 0.658574808  |
| 636 | Gm22253 | Lsm5          | 0.669850712  |
| 637 | Gm22253 | Gm25098       | 0.656646706  |
| 638 | Gm22253 | Gm25449       | 0.616392987  |
| 639 | Gm22253 | Gm21732       | 0.644501631  |
| 640 | Gm22253 | Gm25089       | 0.64846379   |

|     |         |                 |             |
|-----|---------|-----------------|-------------|
| 641 | Gm22253 | Gm21882         | 0.666405984 |
| 642 | Gm22253 | Gm23730         | 0.669850712 |
| 643 | Gm22253 | Gm23305         | 0.664243567 |
| 644 | Gm22253 | mt-Tt           | 0.669850712 |
| 645 | Gm22253 | Gm20831         | 0.613856901 |
| 646 | Gm22253 | Snord116        | 0.669850712 |
| 647 | Gm22253 | mt-Tc           | 0.669850712 |
| 648 | Gm22253 | Olfr166         | 0.63478488  |
| 649 | Gm22253 | Snord116 // Ipw | 0.669850712 |
| 650 | Gm22253 | Gm22510         | 0.625509447 |
| 651 | Gm22253 | Rnu1b1          | 0.669850712 |
| 652 | Gm22253 | Gm22155         | 0.669850712 |
| 653 | Gm22253 | Olfr1231        | 0.618922514 |
| 654 | Gm22253 | Gm4787          | 0.605277579 |
| 655 | Gm22253 | Gm20806         | 0.603370638 |
| 656 | Gm22253 | Ipw             | 0.669850712 |
| 657 | Gm22253 | Olfr1034        | 0.662686071 |
| 658 | Gm22253 | Gm21943         | 0.62432152  |
| 659 | Gm22253 | LOC102640399    | 0.653001706 |
| 660 | Gm22253 | Gm10375         | 0.616879434 |
| 661 | Gm22253 | mt-Tf           | 0.669850712 |
| 662 | Gm22253 | Gm23947         | 0.642276287 |
| 663 | Gm22253 | Gm20815         | 0.624089122 |
| 664 | Gm22253 | mt-Ts1          | 0.669850712 |
| 665 | Gm22253 | mt-Ty           | 0.669850712 |
| 666 | Gm22253 | Gm24624         | 0.601008593 |
| 667 | Gm22253 | LOC102633726    | 0.610520962 |
| 668 | Gm22253 | Gm20747         | 0.607448307 |
| 669 | Gm22253 | Trdn            | 0.662913558 |
| 670 | Gm22253 | Snora74a        | 0.669850712 |
| 671 | Gm22253 | mt-Ts2          | 0.669850712 |
| 672 | Gm22253 | Gm22866         | 0.669850712 |
| 673 | Gm22253 | Rnu12           | 0.669850712 |
| 674 | Gm22253 | Tmeff1          | 0.65030418  |
| 675 | Gm22253 | Gm23928         | 0.602562509 |
| 676 | Gm22253 | LOC102639563    | 0.612052689 |
| 677 | Gm22253 | Vaultre5        | 0.669850712 |
| 678 | Gm22253 | Inmt            | 0.646471019 |
| 679 | Gm22253 | Fam107a         | 0.645410606 |
| 680 | Gm22253 | mt-Tk           | 0.669850712 |
| 681 | Gm22253 | Brox            | 0.657411274 |
| 682 | Gm22253 | Glr3            | 0.616971069 |
| 683 | Gm22253 | mt-Th           | 0.66178471  |
| 684 | Gm22253 | Ddit4           | 0.63226978  |
| 685 | Gm22253 | mt-Tp           | 0.667405111 |
| 686 | Gm22253 | mt-Ta           | 0.669850712 |

|     |         |                 |              |
|-----|---------|-----------------|--------------|
| 687 | Gm22253 | Mpv17           | -0.61068715  |
| 688 | Gm22253 | Gm6245          | -0.638394295 |
| 689 | Gm22253 | Cd59a           | -0.637322477 |
| 690 | Gm22253 | Tmem159         | -0.60103159  |
| 691 | Gm22253 | Acot2           | -0.669850712 |
| 692 | Gm22253 | Dhdh            | -0.622508261 |
| 693 | Gm22253 | Fam213a         | -0.643220229 |
| 694 | Gm22253 | Nmnat1          | -0.605873152 |
| 695 | Gm22253 | Coq5            | -0.669850712 |
| 696 | Gm22253 | Tmem184c        | -0.651508083 |
| 697 | Gm22253 | Nrn1            | -0.610300306 |
| 698 | Gm22253 | Uprt            | -0.651921824 |
| 699 | Gm22253 | Nsun3           | -0.669850712 |
| 700 | Gm22253 | Gm10718         | -0.609800071 |
| 701 | Gm22253 | Nr4a1           | -0.669850712 |
| 702 | Gm22253 | BC023105        | -0.605373598 |
| 703 | Gm22253 | Egr1            | -0.669850712 |
| 704 | Gm22253 | Fos             | -0.669850712 |
| 705 | Gm22253 | Gm5346          | -0.657448885 |
| 706 | Gm22253 | Gm5912          | -0.651967258 |
| 707 | Gm22253 | Murc            | -0.669850712 |
| 708 | Gm25648 | Gm23922         | 0.600369722  |
| 709 | Gm25648 | Lsm5            | 0.600369722  |
| 710 | Gm25648 | Gm25098         | 0.600369722  |
| 711 | Gm25648 | Gm25449         | 0.600369722  |
| 712 | Gm25648 | Gm21732         | 0.600369722  |
| 713 | Gm25648 | Gm25089         | 0.600369722  |
| 714 | Gm25648 | Gm21882         | 0.600369722  |
| 715 | Gm25648 | Gm23730         | 0.600369722  |
| 716 | Gm25648 | Gm23305         | 0.600369722  |
| 717 | Gm25648 | mt-Tt           | 0.600369722  |
| 718 | Gm25648 | Gm20831         | 0.600369722  |
| 719 | Gm25648 | Snord116        | 0.600369722  |
| 720 | Gm25648 | mt-Tc           | 0.600369722  |
| 721 | Gm25648 | Olfr166         | 0.600369722  |
| 722 | Gm25648 | Snord116 // Ipw | 0.600369722  |
| 723 | Gm25648 | Gm22510         | 0.600369722  |
| 724 | Gm25648 | Rnu1b1          | 0.600369722  |
| 725 | Gm25648 | Myl4            | 0.600369722  |
| 726 | Gm25648 | Gm22155         | 0.600369722  |
| 727 | Gm25648 | Olfr1231        | 0.600369722  |
| 728 | Gm25648 | Gm4787          | 0.600369722  |
| 729 | Gm25648 | Gm20806         | 0.600369722  |
| 730 | Gm25648 | Ipw             | 0.600369722  |
| 731 | Gm25648 | Olfr1034        | 0.600369722  |
| 732 | Gm25648 | Gm21943         | 0.600369722  |

|     |         |               |              |
|-----|---------|---------------|--------------|
| 733 | Gm25648 | LOC102640399  | 0.600369722  |
| 734 | Gm25648 | mt-Tf         | 0.600369722  |
| 735 | Gm25648 | Gm20815       | 0.600369722  |
| 736 | Gm25648 | mt-Ts1        | 0.600369722  |
| 737 | Gm25648 | mt-Ty         | 0.600369722  |
| 738 | Gm25648 | Gm24624       | 0.600369722  |
| 739 | Gm25648 | LOC102633726  | 0.600369722  |
| 740 | Gm25648 | Gm20747       | 0.600369722  |
| 741 | Gm25648 | Trdn          | 0.600369722  |
| 742 | Gm25648 | Snora74a      | 0.600369722  |
| 743 | Gm25648 | mt-Ts2        | 0.600369722  |
| 744 | Gm25648 | Gm22866       | 0.600369722  |
| 745 | Gm25648 | Rnu12         | 0.600369722  |
| 746 | Gm25648 | Ppp4r2        | 0.600369722  |
| 747 | Gm25648 | Tmeff1        | 0.600369722  |
| 748 | Gm25648 | LOC102639563  | 0.600369722  |
| 749 | Gm25648 | Vaultre5      | 0.600369722  |
| 750 | Gm25648 | Inmt          | 0.600369722  |
| 751 | Gm25648 | Fam107a       | 0.600369722  |
| 752 | Gm25648 | mt-Tk         | 0.600369722  |
| 753 | Gm25648 | Brox          | 0.600369722  |
| 754 | Gm25648 | Glr3          | 0.600369722  |
| 755 | Gm25648 | mt-Th         | 0.600369722  |
| 756 | Gm25648 | Ddit4         | 0.600369722  |
| 757 | Gm25648 | mt-Tp         | 0.600369722  |
| 758 | Gm25648 | mt-Ta         | 0.600369722  |
| 759 | Gm25648 | Mpv17         | -0.600369722 |
| 760 | Gm25648 | Gm6245        | -0.600369722 |
| 761 | Gm25648 | Cd59a         | -0.600369722 |
| 762 | Gm25648 | Tmem159       | -0.600369722 |
| 763 | Gm25648 | Acot2         | -0.600369722 |
| 764 | Gm25648 | Dhdh          | -0.600369722 |
| 765 | Gm25648 | Fam213a       | -0.600369722 |
| 766 | Gm25648 | Nmnat1        | -0.600369722 |
| 767 | Gm25648 | Coq5          | -0.600369722 |
| 768 | Gm25648 | Nrn1          | -0.600369722 |
| 769 | Gm25648 | Uprt          | -0.600369722 |
| 770 | Gm25648 | Nsun3         | -0.600369722 |
| 771 | Gm25648 | Gm10718       | -0.600369722 |
| 772 | Gm25648 | Nr4a1         | -0.600369722 |
| 773 | Gm25648 | Egr1          | -0.600369722 |
| 774 | Gm25648 | Fos           | -0.600369722 |
| 775 | Gm25648 | G530011O06Rik | -0.600369722 |
| 776 | Gm25648 | Gm5346        | -0.600369722 |
| 777 | Gm25648 | Gm5912        | -0.600369722 |
| 778 | Gm25648 | Murc          | -0.600369722 |

|     |         |                 |             |
|-----|---------|-----------------|-------------|
| 779 | Gm23737 | Gm23922         | 0.658574808 |
| 780 | Gm23737 | Gm25098         | 0.656646706 |
| 781 | Gm23737 | Gm25449         | 0.616392987 |
| 782 | Gm23737 | Gm21732         | 0.644501631 |
| 783 | Gm23737 | Gm25089         | 0.607305416 |
| 784 | Gm23737 | Gm21882         | 0.666405984 |
| 785 | Gm23737 | Gm23730         | 0.71365871  |
| 786 | Gm23737 | Gm23305         | 0.664243567 |
| 787 | Gm23737 | mt-Tt           | 0.71365871  |
| 788 | Gm23737 | Gm20831         | 0.613856901 |
| 789 | Gm23737 | Snord116        | 0.71365871  |
| 790 | Gm23737 | mt-Tc           | 0.71365871  |
| 791 | Gm23737 | Olfr166         | 0.63478488  |
| 792 | Gm23737 | Snord116 // Ipw | 0.695183163 |
| 793 | Gm23737 | Rnu1b1          | 0.71365871  |
| 794 | Gm23737 | Gm22155         | 0.71365871  |
| 795 | Gm23737 | Olfr1231        | 0.618922514 |
| 796 | Gm23737 | Gm20806         | 0.603370638 |
| 797 | Gm23737 | Ipw             | 0.679543558 |
| 798 | Gm23737 | Olfr1034        | 0.662686071 |
| 799 | Gm23737 | Gm21943         | 0.62432152  |
| 800 | Gm23737 | LOC102640399    | 0.653001706 |
| 801 | Gm23737 | mt-Tf           | 0.71365871  |
| 802 | Gm23737 | Gm23947         | 0.642276287 |
| 803 | Gm23737 | Gm20815         | 0.624089122 |
| 804 | Gm23737 | mt-Ts1          | 0.71365871  |
| 805 | Gm23737 | mt-Ty           | 0.71365871  |
| 806 | Gm23737 | Gm24624         | 0.601008593 |
| 807 | Gm23737 | LOC102633726    | 0.610520962 |
| 808 | Gm23737 | Gm20747         | 0.607448307 |
| 809 | Gm23737 | Snora74a        | 0.71365871  |
| 810 | Gm23737 | mt-Ts2          | 0.71365871  |
| 811 | Gm23737 | Gm22866         | 0.71365871  |
| 812 | Gm23737 | Rnu12           | 0.71365871  |
| 813 | Gm23737 | Gm22749         | 0.634337211 |
| 814 | Gm23737 | Tmeff1          | 0.65030418  |
| 815 | Gm23737 | Gm23928         | 0.602562509 |
| 816 | Gm23737 | LOC102639563    | 0.612052689 |
| 817 | Gm23737 | Vaultre5        | 0.71365871  |
| 818 | Gm23737 | Inmt            | 0.646471019 |
| 819 | Gm23737 | Fam107a         | 0.645410606 |
| 820 | Gm23737 | mt-Tk           | 0.71365871  |
| 821 | Gm23737 | Glr3            | 0.616971069 |
| 822 | Gm23737 | mt-Th           | 0.66178471  |
| 823 | Gm23737 | Ddit4           | 0.63226978  |
| 824 | Gm23737 | mt-Tp           | 0.667405111 |

|     |         |                 |              |
|-----|---------|-----------------|--------------|
| 825 | Gm23737 | mt-Ta           | 0.680121023  |
| 826 | Gm23737 | Mpv17           | -0.61068715  |
| 827 | Gm23737 | Gm6245          | -0.638394295 |
| 828 | Gm23737 | Cd59a           | -0.637322477 |
| 829 | Gm23737 | Tmem159         | -0.60103159  |
| 830 | Gm23737 | Acot2           | -0.679628534 |
| 831 | Gm23737 | Dhdh            | -0.622508261 |
| 832 | Gm23737 | Fam213a         | -0.643220229 |
| 833 | Gm23737 | Nmnat1          | -0.605873152 |
| 834 | Gm23737 | Coq5            | -0.677305385 |
| 835 | Gm23737 | Tmem184c        | -0.651508083 |
| 836 | Gm23737 | Nrn1            | -0.610300306 |
| 837 | Gm23737 | Uppt            | -0.651921824 |
| 838 | Gm23737 | Nsun3           | -0.673017501 |
| 839 | Gm23737 | BC023105        | -0.605373598 |
| 840 | Gm23737 | Murc            | -0.71365871  |
| 841 | Gm23922 | Lsm5            | 0.658574808  |
| 842 | Gm23922 | Gm25098         | 0.656646706  |
| 843 | Gm23922 | Gm25449         | 0.616392987  |
| 844 | Gm23922 | Gm21732         | 0.644501631  |
| 845 | Gm23922 | Gm25089         | 0.64846379   |
| 846 | Gm23922 | Gm21882         | 0.658574808  |
| 847 | Gm23922 | Gm23730         | 0.658574808  |
| 848 | Gm23922 | Gm23305         | 0.658574808  |
| 849 | Gm23922 | mt-Tt           | 0.658574808  |
| 850 | Gm23922 | Gm20831         | 0.613856901  |
| 851 | Gm23922 | Snord116        | 0.658574808  |
| 852 | Gm23922 | mt-Tc           | 0.658574808  |
| 853 | Gm23922 | Olfr166         | 0.63478488   |
| 854 | Gm23922 | Snord116 // Ipw | 0.658574808  |
| 855 | Gm23922 | Gm22510         | 0.625509447  |
| 856 | Gm23922 | Rnu1b1          | 0.658574808  |
| 857 | Gm23922 | Myl4            | 0.628830995  |
| 858 | Gm23922 | Gm22155         | 0.658574808  |
| 859 | Gm23922 | Olfr1231        | 0.618922514  |
| 860 | Gm23922 | Gm4787          | 0.605277579  |
| 861 | Gm23922 | Gm20806         | 0.603370638  |
| 862 | Gm23922 | Ipw             | 0.658574808  |
| 863 | Gm23922 | Olfr1034        | 0.658574808  |
| 864 | Gm23922 | Gm21943         | 0.62432152   |
| 865 | Gm23922 | LOC102640399    | 0.653001706  |
| 866 | Gm23922 | mt-Tf           | 0.658574808  |
| 867 | Gm23922 | Gm20815         | 0.624089122  |
| 868 | Gm23922 | mt-Ts1          | 0.658574808  |
| 869 | Gm23922 | mt-Ty           | 0.658574808  |
| 870 | Gm23922 | Gm24624         | 0.601008593  |



|     |         |              |              |
|-----|---------|--------------|--------------|
| 871 | Gm23922 | LOC102633726 | 0.610520962  |
| 872 | Gm23922 | Gm20747      | 0.607448307  |
| 873 | Gm23922 | Trdn         | 0.608574234  |
| 874 | Gm23922 | Snora74a     | 0.658574808  |
| 875 | Gm23922 | mt-Ts2       | 0.658574808  |
| 876 | Gm23922 | Gm22866      | 0.658574808  |
| 877 | Gm23922 | Rnu12        | 0.658574808  |
| 878 | Gm23922 | Tmeff1       | 0.65030418   |
| 879 | Gm23922 | Gm23928      | 0.602562509  |
| 880 | Gm23922 | LOC102639563 | 0.612052689  |
| 881 | Gm23922 | Vaultc5      | 0.658574808  |
| 882 | Gm23922 | Inmt         | 0.646471019  |
| 883 | Gm23922 | Fam107a      | 0.645410606  |
| 884 | Gm23922 | mt-Tk        | 0.658574808  |
| 885 | Gm23922 | Glr3         | 0.616971069  |
| 886 | Gm23922 | mt-Th        | 0.658574808  |
| 887 | Gm23922 | Ddit4        | 0.63226978   |
| 888 | Gm23922 | mt-Tp        | 0.658574808  |
| 889 | Gm23922 | mt-Ta        | 0.658574808  |
| 890 | Gm23922 | Mpv17        | -0.61068715  |
| 891 | Gm23922 | Gm6245       | -0.638394295 |
| 892 | Gm23922 | Cd59a        | -0.637322477 |
| 893 | Gm23922 | Tmem159      | -0.60103159  |
| 894 | Gm23922 | Acot2        | -0.658574808 |
| 895 | Gm23922 | Dhdh         | -0.622508261 |
| 896 | Gm23922 | Fam213a      | -0.643220229 |
| 897 | Gm23922 | Nmnat1       | -0.605873152 |
| 898 | Gm23922 | Coq5         | -0.658574808 |
| 899 | Gm23922 | Tmem184c     | -0.640680762 |
| 900 | Gm23922 | Nrn1         | -0.610300306 |
| 901 | Gm23922 | Uppt         | -0.651921824 |
| 902 | Gm23922 | Nsun3        | -0.658574808 |
| 903 | Gm23922 | Gm10718      | -0.609800071 |
| 904 | Gm23922 | Nr4a1        | -0.658574808 |
| 905 | Gm23922 | BC023105     | -0.605373598 |
| 906 | Gm23922 | Egr1         | -0.658574808 |
| 907 | Gm23922 | Fos          | -0.658574808 |
| 908 | Gm23922 | Gm5346       | -0.654263032 |
| 909 | Gm23922 | Gm5912       | -0.651967258 |
| 910 | Gm23922 | Murc         | -0.658574808 |
| 911 | Lsm5    | Gm25098      | 0.642283769  |
| 912 | Lsm5    | Gm25449      | 0.616392987  |
| 913 | Lsm5    | Gm25089      | 0.64846379   |
| 914 | Lsm5    | Gm23730      | 0.70095173   |
| 915 | Lsm5    | Gm23305      | 0.664243567  |
| 916 | Lsm5    | mt-Tt        | 0.64601116   |

|     |      |                 |              |
|-----|------|-----------------|--------------|
| 917 | Lsm5 | Gm20831         | 0.613856901  |
| 918 | Lsm5 | Snord116        | 0.725166274  |
| 919 | Lsm5 | mt-Tc           | 0.61096251   |
| 920 | Lsm5 | Olfr166         | 0.63478488   |
| 921 | Lsm5 | Snord116 // Ipw | 0.665435345  |
| 922 | Lsm5 | Gm22510         | 0.625509447  |
| 923 | Lsm5 | Olfr1231        | 0.606451907  |
| 924 | Lsm5 | Gm4787          | 0.605277579  |
| 925 | Lsm5 | Gm20806         | 0.603370638  |
| 926 | Lsm5 | Ipw             | 0.679543558  |
| 927 | Lsm5 | Olfr1034        | 0.662686071  |
| 928 | Lsm5 | Gm21943         | 0.62432152   |
| 929 | Lsm5 | LOC102640399    | 0.653001706  |
| 930 | Lsm5 | Gm10375         | 0.616879434  |
| 931 | Lsm5 | mt-Tf           | 0.720624646  |
| 932 | Lsm5 | Gm20815         | 0.624089122  |
| 933 | Lsm5 | mt-Ts1          | 0.624454726  |
| 934 | Lsm5 | mt-Ty           | 0.713642853  |
| 935 | Lsm5 | LOC102633726    | 0.610520962  |
| 936 | Lsm5 | Gm20747         | 0.607448307  |
| 937 | Lsm5 | Trdn            | 0.662913558  |
| 938 | Lsm5 | Rnu12           | 0.603442777  |
| 939 | Lsm5 | Ppp4r2          | 0.725777902  |
| 940 | Lsm5 | Tmeff1          | 0.65030418   |
| 941 | Lsm5 | LOC102639563    | 0.612052689  |
| 942 | Lsm5 | Inmt            | 0.646471019  |
| 943 | Lsm5 | Fam107a         | 0.645410606  |
| 944 | Lsm5 | mt-Tk           | 0.716985592  |
| 945 | Lsm5 | Brox            | 0.657411274  |
| 946 | Lsm5 | Glr3            | 0.616971069  |
| 947 | Lsm5 | mt-Th           | 0.66178471   |
| 948 | Lsm5 | Ddit4           | 0.63226978   |
| 949 | Lsm5 | mt-Tp           | 0.665011816  |
| 950 | Lsm5 | mt-Ta           | 0.634771368  |
| 951 | Lsm5 | Mpv17           | -0.61068715  |
| 952 | Lsm5 | Gm6245          | -0.631869125 |
| 953 | Lsm5 | Tmem159         | -0.60103159  |
| 954 | Lsm5 | Fam213a         | -0.643220229 |
| 955 | Lsm5 | Uppt            | -0.648469299 |
| 956 | Lsm5 | Gm10718         | -0.609800071 |
| 957 | Lsm5 | Nr4a1           | -0.747000222 |
| 958 | Lsm5 | Egr1            | -0.704399843 |
| 959 | Lsm5 | Fos             | -0.695614744 |
| 960 | Lsm5 | G530011O06Rik   | -0.740456125 |
| 961 | Lsm5 | Gm5346          | -0.657448885 |
| 962 | Lsm5 | Gm5912          | -0.651967258 |

|      |         |                 |              |
|------|---------|-----------------|--------------|
| 963  | Lsm5    | Murc            | -0.761220816 |
| 964  | Gm25098 | Gm25449         | 0.616392987  |
| 965  | Gm25098 | Gm21732         | 0.644501631  |
| 966  | Gm25098 | Gm25089         | 0.64846379   |
| 967  | Gm25098 | Gm21882         | 0.656646706  |
| 968  | Gm25098 | Gm23730         | 0.656646706  |
| 969  | Gm25098 | Gm23305         | 0.656646706  |
| 970  | Gm25098 | mt-Tt           | 0.656646706  |
| 971  | Gm25098 | Gm20831         | 0.613856901  |
| 972  | Gm25098 | Snord116        | 0.656646706  |
| 973  | Gm25098 | mt-Tc           | 0.656646706  |
| 974  | Gm25098 | Olfr166         | 0.63478488   |
| 975  | Gm25098 | Snord116 // Ipw | 0.656646706  |
| 976  | Gm25098 | Gm22510         | 0.625509447  |
| 977  | Gm25098 | Rnu1b1          | 0.656646706  |
| 978  | Gm25098 | Gm22155         | 0.656646706  |
| 979  | Gm25098 | Olfr1231        | 0.618922514  |
| 980  | Gm25098 | Gm20806         | 0.603370638  |
| 981  | Gm25098 | Ipw             | 0.656646706  |
| 982  | Gm25098 | Olfr1034        | 0.656646706  |
| 983  | Gm25098 | Gm21943         | 0.62432152   |
| 984  | Gm25098 | LOC102640399    | 0.653001706  |
| 985  | Gm25098 | mt-Tf           | 0.656646706  |
| 986  | Gm25098 | Gm23947         | 0.642276287  |
| 987  | Gm25098 | Gm20815         | 0.624089122  |
| 988  | Gm25098 | mt-Ts1          | 0.656646706  |
| 989  | Gm25098 | mt-Ty           | 0.656646706  |
| 990  | Gm25098 | Gm24624         | 0.601008593  |
| 991  | Gm25098 | LOC102633726    | 0.610520962  |
| 992  | Gm25098 | Gm20747         | 0.607448307  |
| 993  | Gm25098 | Snora74a        | 0.656646706  |
| 994  | Gm25098 | mt-Ts2          | 0.656646706  |
| 995  | Gm25098 | Gm22866         | 0.656646706  |
| 996  | Gm25098 | Rnu12           | 0.656646706  |
| 997  | Gm25098 | Tmeff1          | 0.65030418   |
| 998  | Gm25098 | Gm23928         | 0.602562509  |
| 999  | Gm25098 | LOC102639563    | 0.612052689  |
| 1000 | Gm25098 | Vaultre5        | 0.656646706  |
| 1001 | Gm25098 | Inmt            | 0.646471019  |
| 1002 | Gm25098 | Fam107a         | 0.626498046  |
| 1003 | Gm25098 | mt-Tk           | 0.656646706  |
| 1004 | Gm25098 | Glr3            | 0.616971069  |
| 1005 | Gm25098 | mt-Th           | 0.656646706  |
| 1006 | Gm25098 | Ddit4           | 0.63226978   |
| 1007 | Gm25098 | mt-Tp           | 0.656646706  |
| 1008 | Gm25098 | mt-Ta           | 0.656646706  |

|      |         |                 |              |
|------|---------|-----------------|--------------|
| 1009 | Gm25098 | Mpv17           | -0.61068715  |
| 1010 | Gm25098 | Gm6245          | -0.638394295 |
| 1011 | Gm25098 | Cd59a           | -0.637322477 |
| 1012 | Gm25098 | Tmem159         | -0.60103159  |
| 1013 | Gm25098 | Acot2           | -0.656646706 |
| 1014 | Gm25098 | Dhdh            | -0.622508261 |
| 1015 | Gm25098 | Fam213a         | -0.643220229 |
| 1016 | Gm25098 | Nmnat1          | -0.605873152 |
| 1017 | Gm25098 | Coq5            | -0.656646706 |
| 1018 | Gm25098 | Tmem184c        | -0.651508083 |
| 1019 | Gm25098 | Nrn1            | -0.610300306 |
| 1020 | Gm25098 | Uprt            | -0.651921824 |
| 1021 | Gm25098 | Nsun3           | -0.656646706 |
| 1022 | Gm25098 | Gm10718         | -0.609800071 |
| 1023 | Gm25098 | Nr4a1           | -0.656646706 |
| 1024 | Gm25098 | BC023105        | -0.605373598 |
| 1025 | Gm25098 | Fos             | -0.620396953 |
| 1026 | Gm25098 | Gm5912          | -0.651967258 |
| 1027 | Gm25098 | Murc            | -0.656646706 |
| 1028 | Gm25449 | Gm21732         | 0.616392987  |
| 1029 | Gm25449 | Gm25089         | 0.616392987  |
| 1030 | Gm25449 | Gm21882         | 0.616392987  |
| 1031 | Gm25449 | Gm23730         | 0.616392987  |
| 1032 | Gm25449 | Gm23305         | 0.616392987  |
| 1033 | Gm25449 | mt-Tt           | 0.616392987  |
| 1034 | Gm25449 | Gm20831         | 0.613856901  |
| 1035 | Gm25449 | Snord116        | 0.616392987  |
| 1036 | Gm25449 | mt-Tc           | 0.616392987  |
| 1037 | Gm25449 | Olfr166         | 0.616392987  |
| 1038 | Gm25449 | Snord116 // Ipw | 0.616392987  |
| 1039 | Gm25449 | Gm22510         | 0.616392987  |
| 1040 | Gm25449 | Rnu1b1          | 0.616392987  |
| 1041 | Gm25449 | Myl4            | 0.616392987  |
| 1042 | Gm25449 | Gm22155         | 0.616392987  |
| 1043 | Gm25449 | Olfr1231        | 0.616392987  |
| 1044 | Gm25449 | Gm4787          | 0.605277579  |
| 1045 | Gm25449 | Gm20806         | 0.603370638  |
| 1046 | Gm25449 | Ipw             | 0.616392987  |
| 1047 | Gm25449 | Olfr1034        | 0.616392987  |
| 1048 | Gm25449 | Gm21943         | 0.616392987  |
| 1049 | Gm25449 | LOC102640399    | 0.616392987  |
| 1050 | Gm25449 | mt-Tf           | 0.616392987  |
| 1051 | Gm25449 | Gm20815         | 0.616392987  |
| 1052 | Gm25449 | mt-Ts1          | 0.616392987  |
| 1053 | Gm25449 | mt-Ty           | 0.616392987  |
| 1054 | Gm25449 | Gm24624         | 0.601008593  |

|      |         |              |              |
|------|---------|--------------|--------------|
| 1055 | Gm25449 | LOC102633726 | 0.610520962  |
| 1056 | Gm25449 | Gm20747      | 0.607448307  |
| 1057 | Gm25449 | Trdn         | 0.616392987  |
| 1058 | Gm25449 | Snora74a     | 0.616392987  |
| 1059 | Gm25449 | mt-Ts2       | 0.616392987  |
| 1060 | Gm25449 | Gm22866      | 0.616392987  |
| 1061 | Gm25449 | Rnu12        | 0.616392987  |
| 1062 | Gm25449 | Ppp4r2       | 0.614158295  |
| 1063 | Gm25449 | Tmeff1       | 0.616392987  |
| 1064 | Gm25449 | LOC102639563 | 0.612052689  |
| 1065 | Gm25449 | Vaultre5     | 0.616392987  |
| 1066 | Gm25449 | Inmt         | 0.616392987  |
| 1067 | Gm25449 | Fam107a      | 0.616392987  |
| 1068 | Gm25449 | mt-Tk        | 0.616392987  |
| 1069 | Gm25449 | Brox         | 0.616392987  |
| 1070 | Gm25449 | Glrx3        | 0.616392987  |
| 1071 | Gm25449 | mt-Th        | 0.616392987  |
| 1072 | Gm25449 | Ddit4        | 0.616392987  |
| 1073 | Gm25449 | mt-Tp        | 0.616392987  |
| 1074 | Gm25449 | mt-Ta        | 0.616392987  |
| 1075 | Gm25449 | Mpv17        | -0.61068715  |
| 1076 | Gm25449 | Gm6245       | -0.616392987 |
| 1077 | Gm25449 | Cd59a        | -0.616392987 |
| 1078 | Gm25449 | Tmem159      | -0.60103159  |
| 1079 | Gm25449 | Acot2        | -0.616392987 |
| 1080 | Gm25449 | Dhdh         | -0.616392987 |
| 1081 | Gm25449 | Fam213a      | -0.616392987 |
| 1082 | Gm25449 | Nmnat1       | -0.605873152 |
| 1083 | Gm25449 | Coq5         | -0.616392987 |
| 1084 | Gm25449 | Nrn1         | -0.610300306 |
| 1085 | Gm25449 | Uppt         | -0.616392987 |
| 1086 | Gm25449 | Nsun3        | -0.616392987 |
| 1087 | Gm25449 | Gm10718      | -0.609800071 |
| 1088 | Gm25449 | Nr4a1        | -0.616392987 |
| 1089 | Gm25449 | Egr1         | -0.616392987 |
| 1090 | Gm25449 | Fos          | -0.616392987 |
| 1091 | Gm25449 | Gm5346       | -0.616392987 |
| 1092 | Gm25449 | Gm5912       | -0.616392987 |
| 1093 | Gm25449 | Murc         | -0.616392987 |
| 1094 | Gm21732 | Gm25089      | 0.644501631  |
| 1095 | Gm21732 | Gm21882      | 0.644501631  |
| 1096 | Gm21732 | Gm23730      | 0.644501631  |
| 1097 | Gm21732 | Gm23305      | 0.644501631  |
| 1098 | Gm21732 | mt-Tt        | 0.644501631  |
| 1099 | Gm21732 | Gm20831      | 0.613856901  |
| 1100 | Gm21732 | Snord116     | 0.644501631  |

|      |         |                 |              |
|------|---------|-----------------|--------------|
| 1101 | Gm21732 | mt-Tc           | 0.644501631  |
| 1102 | Gm21732 | Olfr166         | 0.63478488   |
| 1103 | Gm21732 | Snord116 // Ipw | 0.644501631  |
| 1104 | Gm21732 | Gm22510         | 0.625509447  |
| 1105 | Gm21732 | Rnu1b1          | 0.644501631  |
| 1106 | Gm21732 | Myl4            | 0.642387625  |
| 1107 | Gm21732 | Gm22155         | 0.644501631  |
| 1108 | Gm21732 | Olfr1231        | 0.618389416  |
| 1109 | Gm21732 | Gm20806         | 0.603370638  |
| 1110 | Gm21732 | Ipw             | 0.644501631  |
| 1111 | Gm21732 | Olfr1034        | 0.644501631  |
| 1112 | Gm21732 | Gm21943         | 0.62432152   |
| 1113 | Gm21732 | LOC102640399    | 0.644501631  |
| 1114 | Gm21732 | mt-Tf           | 0.644501631  |
| 1115 | Gm21732 | Gm20815         | 0.624089122  |
| 1116 | Gm21732 | mt-Ts1          | 0.644501631  |
| 1117 | Gm21732 | mt-Ty           | 0.644501631  |
| 1118 | Gm21732 | Gm24624         | 0.601008593  |
| 1119 | Gm21732 | LOC102633726    | 0.610520962  |
| 1120 | Gm21732 | Gm20747         | 0.607448307  |
| 1121 | Gm21732 | Snora74a        | 0.636646912  |
| 1122 | Gm21732 | mt-Ts2          | 0.644501631  |
| 1123 | Gm21732 | Gm22866         | 0.644501631  |
| 1124 | Gm21732 | Rnu12           | 0.644501631  |
| 1125 | Gm21732 | Tmeff1          | 0.644501631  |
| 1126 | Gm21732 | LOC102639563    | 0.612052689  |
| 1127 | Gm21732 | Vaultre5        | 0.644501631  |
| 1128 | Gm21732 | Inmt            | 0.603800407  |
| 1129 | Gm21732 | mt-Tk           | 0.644501631  |
| 1130 | Gm21732 | Glr3            | 0.616971069  |
| 1131 | Gm21732 | mt-Th           | 0.644501631  |
| 1132 | Gm21732 | Ddit4           | 0.608171217  |
| 1133 | Gm21732 | mt-Tp           | 0.644501631  |
| 1134 | Gm21732 | mt-Ta           | 0.644501631  |
| 1135 | Gm21732 | Mpv17           | -0.61068715  |
| 1136 | Gm21732 | Gm6245          | -0.638394295 |
| 1137 | Gm21732 | Cd59a           | -0.637322477 |
| 1138 | Gm21732 | Tmem159         | -0.60103159  |
| 1139 | Gm21732 | Acot2           | -0.644501631 |
| 1140 | Gm21732 | Dhdh            | -0.622508261 |
| 1141 | Gm21732 | Fam213a         | -0.643220229 |
| 1142 | Gm21732 | Nmnat1          | -0.605873152 |
| 1143 | Gm21732 | Coq5            | -0.644501631 |
| 1144 | Gm21732 | Uprt            | -0.644501631 |
| 1145 | Gm21732 | Nsun3           | -0.644501631 |
| 1146 | Gm21732 | Gm10718         | -0.609800071 |

|      |         |                 |              |
|------|---------|-----------------|--------------|
| 1147 | Gm21732 | BC023105        | -0.605373598 |
| 1148 | Gm21732 | Gm5912          | -0.644501631 |
| 1149 | Gm21732 | Murc            | -0.644501631 |
| 1150 | Gm25089 | Gm21882         | 0.64846379   |
| 1151 | Gm25089 | Gm23730         | 0.64846379   |
| 1152 | Gm25089 | Gm23305         | 0.64846379   |
| 1153 | Gm25089 | mt-Tt           | 0.626492121  |
| 1154 | Gm25089 | Gm20831         | 0.613856901  |
| 1155 | Gm25089 | Snord116        | 0.64846379   |
| 1156 | Gm25089 | mt-Tc           | 0.64846379   |
| 1157 | Gm25089 | Olfr166         | 0.63478488   |
| 1158 | Gm25089 | Snord116 // Ipw | 0.64846379   |
| 1159 | Gm25089 | Gm22510         | 0.625509447  |
| 1160 | Gm25089 | Rnu1b1          | 0.64846379   |
| 1161 | Gm25089 | Myl4            | 0.642387625  |
| 1162 | Gm25089 | Olfr1231        | 0.614302373  |
| 1163 | Gm25089 | Gm4787          | 0.605277579  |
| 1164 | Gm25089 | Gm20806         | 0.603370638  |
| 1165 | Gm25089 | Ipw             | 0.64846379   |
| 1166 | Gm25089 | Olfr1034        | 0.64846379   |
| 1167 | Gm25089 | Gm21943         | 0.62432152   |
| 1168 | Gm25089 | LOC102640399    | 0.64846379   |
| 1169 | Gm25089 | mt-Tf           | 0.64846379   |
| 1170 | Gm25089 | Gm20815         | 0.624089122  |
| 1171 | Gm25089 | mt-Ts1          | 0.64846379   |
| 1172 | Gm25089 | mt-Ty           | 0.64846379   |
| 1173 | Gm25089 | Gm24624         | 0.601008593  |
| 1174 | Gm25089 | LOC102633726    | 0.610520962  |
| 1175 | Gm25089 | Gm20747         | 0.607448307  |
| 1176 | Gm25089 | mt-Ts2          | 0.64846379   |
| 1177 | Gm25089 | Gm22866         | 0.64846379   |
| 1178 | Gm25089 | Rnu12           | 0.645183951  |
| 1179 | Gm25089 | Tmeff1          | 0.64846379   |
| 1180 | Gm25089 | LOC102639563    | 0.612052689  |
| 1181 | Gm25089 | Vaultre5        | 0.64846379   |
| 1182 | Gm25089 | mt-Tk           | 0.64846379   |
| 1183 | Gm25089 | Glr3            | 0.616971069  |
| 1184 | Gm25089 | mt-Th           | 0.64846379   |
| 1185 | Gm25089 | Ddit4           | 0.631360489  |
| 1186 | Gm25089 | mt-Tp           | 0.64846379   |
| 1187 | Gm25089 | mt-Ta           | 0.64846379   |
| 1188 | Gm25089 | Mpv17           | -0.61068715  |
| 1189 | Gm25089 | Gm6245          | -0.638394295 |
| 1190 | Gm25089 | Cd59a           | -0.637322477 |
| 1191 | Gm25089 | Tmem159         | -0.60103159  |
| 1192 | Gm25089 | Acot2           | -0.64846379  |

|      |         |                 |              |
|------|---------|-----------------|--------------|
| 1193 | Gm25089 | Dhdh            | -0.622508261 |
| 1194 | Gm25089 | Fam213a         | -0.643220229 |
| 1195 | Gm25089 | Nmnat1          | -0.605873152 |
| 1196 | Gm25089 | Coq5            | -0.64846379  |
| 1197 | Gm25089 | Uppt            | -0.64846379  |
| 1198 | Gm25089 | Nsun3           | -0.639296357 |
| 1199 | Gm25089 | Gm10718         | -0.609800071 |
| 1200 | Gm25089 | BC023105        | -0.605373598 |
| 1201 | Gm25089 | Egr1            | -0.609483998 |
| 1202 | Gm25089 | Fos             | -0.610218063 |
| 1203 | Gm25089 | Gm5912          | -0.64846379  |
| 1204 | Gm25089 | Murc            | -0.64846379  |
| 1205 | Gm21882 | Gm23730         | 0.666405984  |
| 1206 | Gm21882 | Gm23305         | 0.664243567  |
| 1207 | Gm21882 | mt-Tt           | 0.666405984  |
| 1208 | Gm21882 | Gm20831         | 0.613856901  |
| 1209 | Gm21882 | Snord116        | 0.666405984  |
| 1210 | Gm21882 | mt-Tc           | 0.666405984  |
| 1211 | Gm21882 | Olfr166         | 0.63478488   |
| 1212 | Gm21882 | Snord116 // Ipw | 0.666405984  |
| 1213 | Gm21882 | Gm22510         | 0.625509447  |
| 1214 | Gm21882 | Rnu1b1          | 0.666405984  |
| 1215 | Gm21882 | Myl4            | 0.614114394  |
| 1216 | Gm21882 | Gm22155         | 0.666405984  |
| 1217 | Gm21882 | Olfr1231        | 0.618922514  |
| 1218 | Gm21882 | Gm20806         | 0.603370638  |
| 1219 | Gm21882 | Ipw             | 0.666405984  |
| 1220 | Gm21882 | Olfr1034        | 0.662686071  |
| 1221 | Gm21882 | Gm21943         | 0.62432152   |
| 1222 | Gm21882 | LOC102640399    | 0.653001706  |
| 1223 | Gm21882 | mt-Tf           | 0.666405984  |
| 1224 | Gm21882 | Gm23947         | 0.642276287  |
| 1225 | Gm21882 | Gm20815         | 0.624089122  |
| 1226 | Gm21882 | mt-Ts1          | 0.666405984  |
| 1227 | Gm21882 | mt-Ty           | 0.666405984  |
| 1228 | Gm21882 | Gm24624         | 0.601008593  |
| 1229 | Gm21882 | LOC102633726    | 0.610520962  |
| 1230 | Gm21882 | Gm20747         | 0.607448307  |
| 1231 | Gm21882 | Snora74a        | 0.666405984  |
| 1232 | Gm21882 | mt-Ts2          | 0.666405984  |
| 1233 | Gm21882 | Gm22866         | 0.666405984  |
| 1234 | Gm21882 | Rnu12           | 0.666405984  |
| 1235 | Gm21882 | Tmeff1          | 0.65030418   |
| 1236 | Gm21882 | LOC102639563    | 0.612052689  |
| 1237 | Gm21882 | Vaultre5        | 0.666405984  |
| 1238 | Gm21882 | Inmt            | 0.646471019  |



|      |         |                 |              |
|------|---------|-----------------|--------------|
| 1239 | Gm21882 | Fam107a         | 0.621684412  |
| 1240 | Gm21882 | mt-Tk           | 0.666405984  |
| 1241 | Gm21882 | Glrx3           | 0.616971069  |
| 1242 | Gm21882 | mt-Th           | 0.66178471   |
| 1243 | Gm21882 | Ddit4           | 0.63226978   |
| 1244 | Gm21882 | mt-Tp           | 0.666405984  |
| 1245 | Gm21882 | mt-Ta           | 0.666405984  |
| 1246 | Gm21882 | Mpv17           | -0.61068715  |
| 1247 | Gm21882 | Gm6245          | -0.638394295 |
| 1248 | Gm21882 | Cd59a           | -0.637322477 |
| 1249 | Gm21882 | Tmem159         | -0.60103159  |
| 1250 | Gm21882 | Acot2           | -0.666405984 |
| 1251 | Gm21882 | Dhdh            | -0.622508261 |
| 1252 | Gm21882 | Fam213a         | -0.643220229 |
| 1253 | Gm21882 | Nmnat1          | -0.605873152 |
| 1254 | Gm21882 | Coq5            | -0.666405984 |
| 1255 | Gm21882 | Tmem184c        | -0.650602006 |
| 1256 | Gm21882 | Nrn1            | -0.610300306 |
| 1257 | Gm21882 | Uprt            | -0.651921824 |
| 1258 | Gm21882 | Nsun3           | -0.666405984 |
| 1259 | Gm21882 | Gm10718         | -0.609800071 |
| 1260 | Gm21882 | BC023105        | -0.605373598 |
| 1261 | Gm21882 | Gm5912          | -0.630204077 |
| 1262 | Gm21882 | Murc            | -0.666405984 |
| 1263 | Gm23730 | Gm23305         | 0.664243567  |
| 1264 | Gm23730 | mt-Tt           | 0.726798019  |
| 1265 | Gm23730 | Gm20831         | 0.613856901  |
| 1266 | Gm23730 | Snord116        | 0.725166274  |
| 1267 | Gm23730 | mt-Tc           | 0.726798019  |
| 1268 | Gm23730 | Olfr166         | 0.63478488   |
| 1269 | Gm23730 | Snord116 // Ipw | 0.695183163  |
| 1270 | Gm23730 | Gm22510         | 0.620136599  |
| 1271 | Gm23730 | Rnu1b1          | 0.726798019  |
| 1272 | Gm23730 | Gm22155         | 0.726798019  |
| 1273 | Gm23730 | Olfr1231        | 0.618922514  |
| 1274 | Gm23730 | Gm4787          | 0.605277579  |
| 1275 | Gm23730 | Gm20806         | 0.603370638  |
| 1276 | Gm23730 | Ipw             | 0.679543558  |
| 1277 | Gm23730 | Olfr1034        | 0.662686071  |
| 1278 | Gm23730 | Gm21943         | 0.62432152   |
| 1279 | Gm23730 | LOC102640399    | 0.653001706  |
| 1280 | Gm23730 | Gm10375         | 0.616879434  |
| 1281 | Gm23730 | mt-Tf           | 0.726798019  |
| 1282 | Gm23730 | Gm23947         | 0.642276287  |
| 1283 | Gm23730 | Gm20815         | 0.624089122  |
| 1284 | Gm23730 | mt-Ts1          | 0.726798019  |

|      |         |              |              |
|------|---------|--------------|--------------|
| 1285 | Gm23730 | mt-Ty        | 0.726798019  |
| 1286 | Gm23730 | Gm24624      | 0.601008593  |
| 1287 | Gm23730 | LOC102633726 | 0.610520962  |
| 1288 | Gm23730 | Gm20747      | 0.607448307  |
| 1289 | Gm23730 | Trdn         | 0.662913558  |
| 1290 | Gm23730 | Snora74a     | 0.716709874  |
| 1291 | Gm23730 | mt-Ts2       | 0.726798019  |
| 1292 | Gm23730 | Gm22866      | 0.726798019  |
| 1293 | Gm23730 | Rnu12        | 0.714196988  |
| 1294 | Gm23730 | Ppp4r2       | 0.725777902  |
| 1295 | Gm23730 | Gm22749      | 0.634337211  |
| 1296 | Gm23730 | Tmeff1       | 0.65030418   |
| 1297 | Gm23730 | Gm23928      | 0.602562509  |
| 1298 | Gm23730 | LOC102639563 | 0.612052689  |
| 1299 | Gm23730 | Vaultre5     | 0.726798019  |
| 1300 | Gm23730 | Inmt         | 0.646471019  |
| 1301 | Gm23730 | Fam107a      | 0.645410606  |
| 1302 | Gm23730 | mt-Tk        | 0.720414242  |
| 1303 | Gm23730 | Brox         | 0.657411274  |
| 1304 | Gm23730 | Glrx3        | 0.616971069  |
| 1305 | Gm23730 | mt-Th        | 0.66178471   |
| 1306 | Gm23730 | Ddit4        | 0.63226978   |
| 1307 | Gm23730 | mt-Tp        | 0.667405111  |
| 1308 | Gm23730 | mt-Ta        | 0.680121023  |
| 1309 | Gm23730 | Mpv17        | -0.61068715  |
| 1310 | Gm23730 | Gm6245       | -0.638394295 |
| 1311 | Gm23730 | Cd59a        | -0.637322477 |
| 1312 | Gm23730 | Tmem159      | -0.60103159  |
| 1313 | Gm23730 | Acot2        | -0.679628534 |
| 1314 | Gm23730 | Dhdh         | -0.622508261 |
| 1315 | Gm23730 | Fam213a      | -0.643220229 |
| 1316 | Gm23730 | Nmnat1       | -0.605873152 |
| 1317 | Gm23730 | Coq5         | -0.677305385 |
| 1318 | Gm23730 | Tmem184c     | -0.651508083 |
| 1319 | Gm23730 | Nrn1         | -0.610300306 |
| 1320 | Gm23730 | Uprt         | -0.651921824 |
| 1321 | Gm23730 | Nsun3        | -0.673017501 |
| 1322 | Gm23730 | Gm10718      | -0.609800071 |
| 1323 | Gm23730 | Nr4a1        | -0.623776868 |
| 1324 | Gm23730 | BC023105     | -0.605373598 |
| 1325 | Gm23730 | Fos          | -0.623812344 |
| 1326 | Gm23730 | Gm5346       | -0.657448885 |
| 1327 | Gm23730 | Gm5912       | -0.651967258 |
| 1328 | Gm23730 | Murc         | -0.726798019 |
| 1329 | Gm23305 | mt-Tt        | 0.664243567  |
| 1330 | Gm23305 | Gm20831      | 0.613856901  |

|      |         |                 |              |
|------|---------|-----------------|--------------|
| 1331 | Gm23305 | Snord116        | 0.664243567  |
| 1332 | Gm23305 | mt-Tc           | 0.664243567  |
| 1333 | Gm23305 | Olfr166         | 0.63478488   |
| 1334 | Gm23305 | Snord116 // Ipw | 0.664243567  |
| 1335 | Gm23305 | Gm22510         | 0.625509447  |
| 1336 | Gm23305 | Rnu1b1          | 0.664243567  |
| 1337 | Gm23305 | Gm22155         | 0.664243567  |
| 1338 | Gm23305 | Olfr1231        | 0.618922514  |
| 1339 | Gm23305 | Gm4787          | 0.605277579  |
| 1340 | Gm23305 | Gm20806         | 0.603370638  |
| 1341 | Gm23305 | Ipw             | 0.664243567  |
| 1342 | Gm23305 | Olfr1034        | 0.662686071  |
| 1343 | Gm23305 | Gm21943         | 0.62432152   |
| 1344 | Gm23305 | LOC102640399    | 0.653001706  |
| 1345 | Gm23305 | Gm10375         | 0.604081696  |
| 1346 | Gm23305 | mt-Tf           | 0.664243567  |
| 1347 | Gm23305 | Gm23947         | 0.642276287  |
| 1348 | Gm23305 | Gm20815         | 0.624089122  |
| 1349 | Gm23305 | mt-Ts1          | 0.664243567  |
| 1350 | Gm23305 | mt-Ty           | 0.664243567  |
| 1351 | Gm23305 | Gm24624         | 0.601008593  |
| 1352 | Gm23305 | LOC102633726    | 0.610520962  |
| 1353 | Gm23305 | Gm20747         | 0.607448307  |
| 1354 | Gm23305 | Trdn            | 0.662913558  |
| 1355 | Gm23305 | Snora74a        | 0.664243567  |
| 1356 | Gm23305 | mt-Ts2          | 0.664243567  |
| 1357 | Gm23305 | Gm22866         | 0.664243567  |
| 1358 | Gm23305 | Rnu12           | 0.664243567  |
| 1359 | Gm23305 | Tmeff1          | 0.65030418   |
| 1360 | Gm23305 | Gm23928         | 0.602562509  |
| 1361 | Gm23305 | LOC102639563    | 0.612052689  |
| 1362 | Gm23305 | Vaultre5        | 0.664243567  |
| 1363 | Gm23305 | Inmt            | 0.646471019  |
| 1364 | Gm23305 | Fam107a         | 0.645410606  |
| 1365 | Gm23305 | mt-Tk           | 0.664243567  |
| 1366 | Gm23305 | Brox            | 0.614858096  |
| 1367 | Gm23305 | Glr3            | 0.616971069  |
| 1368 | Gm23305 | mt-Th           | 0.66178471   |
| 1369 | Gm23305 | Ddit4           | 0.63226978   |
| 1370 | Gm23305 | mt-Tp           | 0.664243567  |
| 1371 | Gm23305 | mt-Ta           | 0.664243567  |
| 1372 | Gm23305 | Mpv17           | -0.61068715  |
| 1373 | Gm23305 | Gm6245          | -0.638394295 |
| 1374 | Gm23305 | Cd59a           | -0.637322477 |
| 1375 | Gm23305 | Tmem159         | -0.60103159  |
| 1376 | Gm23305 | Acot2           | -0.664243567 |

|      |         |                 |              |
|------|---------|-----------------|--------------|
| 1377 | Gm23305 | Dhdh            | -0.622508261 |
| 1378 | Gm23305 | Fam213a         | -0.643220229 |
| 1379 | Gm23305 | Nmnat1          | -0.605873152 |
| 1380 | Gm23305 | Coq5            | -0.664243567 |
| 1381 | Gm23305 | Tmem184c        | -0.651508083 |
| 1382 | Gm23305 | Nrn1            | -0.610300306 |
| 1383 | Gm23305 | Uprt            | -0.651921824 |
| 1384 | Gm23305 | Nsun3           | -0.664243567 |
| 1385 | Gm23305 | Gm10718         | -0.609800071 |
| 1386 | Gm23305 | Nr4a1           | -0.664243567 |
| 1387 | Gm23305 | BC023105        | -0.605373598 |
| 1388 | Gm23305 | Egr1            | -0.664243567 |
| 1389 | Gm23305 | Fos             | -0.664243567 |
| 1390 | Gm23305 | Gm5346          | -0.657448885 |
| 1391 | Gm23305 | Gm5912          | -0.651967258 |
| 1392 | Gm23305 | Murc            | -0.664243567 |
| 1393 | mt-Tt   | Gm20831         | 0.613856901  |
| 1394 | mt-Tt   | Snord116        | 0.725166274  |
| 1395 | mt-Tt   | mt-Tc           | 0.847530386  |
| 1396 | mt-Tt   | Olfr166         | 0.63478488   |
| 1397 | mt-Tt   | Snord116 // Ipw | 0.695183163  |
| 1398 | mt-Tt   | Gm22510         | 0.625509447  |
| 1399 | mt-Tt   | Rnu1b1          | 0.859660173  |
| 1400 | mt-Tt   | Gm22155         | 0.753346542  |
| 1401 | mt-Tt   | Olfr1231        | 0.618922514  |
| 1402 | mt-Tt   | Gm4787          | 0.605277579  |
| 1403 | mt-Tt   | Gm20806         | 0.603370638  |
| 1404 | mt-Tt   | Ipw             | 0.679543558  |
| 1405 | mt-Tt   | Olfr1034        | 0.662686071  |
| 1406 | mt-Tt   | Gm21943         | 0.62432152   |
| 1407 | mt-Tt   | LOC102640399    | 0.653001706  |
| 1408 | mt-Tt   | mt-Tf           | 0.843977183  |
| 1409 | mt-Tt   | Gm23947         | 0.642276287  |
| 1410 | mt-Tt   | Gm20815         | 0.624089122  |
| 1411 | mt-Tt   | mt-Ts1          | 0.823514957  |
| 1412 | mt-Tt   | mt-Ty           | 0.792687001  |
| 1413 | mt-Tt   | Gm24624         | 0.601008593  |
| 1414 | mt-Tt   | LOC102633726    | 0.610520962  |
| 1415 | mt-Tt   | Gm20747         | 0.607448307  |
| 1416 | mt-Tt   | Trdn            | 0.634569329  |
| 1417 | mt-Tt   | Snora74a        | 0.716709874  |
| 1418 | mt-Tt   | mt-Ts2          | 0.822093546  |
| 1419 | mt-Tt   | Gm22866         | 0.810797753  |
| 1420 | mt-Tt   | Rnu12           | 0.714196988  |
| 1421 | mt-Tt   | Gm22749         | 0.601767939  |
| 1422 | mt-Tt   | Tmeff1          | 0.65030418   |

|      |         |                 |              |
|------|---------|-----------------|--------------|
| 1423 | mt-Tt   | Gm23928         | 0.602562509  |
| 1424 | mt-Tt   | LOC102639563    | 0.612052689  |
| 1425 | mt-Tt   | Vaultre5        | 0.728238836  |
| 1426 | mt-Tt   | Inmt            | 0.646471019  |
| 1427 | mt-Tt   | Fam107a         | 0.645410606  |
| 1428 | mt-Tt   | mt-Tk           | 0.720414242  |
| 1429 | mt-Tt   | Brox            | 0.657411274  |
| 1430 | mt-Tt   | Glrx3           | 0.616971069  |
| 1431 | mt-Tt   | mt-Th           | 0.66178471   |
| 1432 | mt-Tt   | Ddit4           | 0.63226978   |
| 1433 | mt-Tt   | mt-Tp           | 0.667405111  |
| 1434 | mt-Tt   | mt-Ta           | 0.680121023  |
| 1435 | mt-Tt   | Mpv17           | -0.61068715  |
| 1436 | mt-Tt   | Gm6245          | -0.638394295 |
| 1437 | mt-Tt   | Cd59a           | -0.637322477 |
| 1438 | mt-Tt   | Tmem159         | -0.60103159  |
| 1439 | mt-Tt   | Acot2           | -0.679628534 |
| 1440 | mt-Tt   | Dhdh            | -0.622508261 |
| 1441 | mt-Tt   | Fam213a         | -0.643220229 |
| 1442 | mt-Tt   | Nmnat1          | -0.605873152 |
| 1443 | mt-Tt   | Coq5            | -0.677305385 |
| 1444 | mt-Tt   | Tmem184c        | -0.651508083 |
| 1445 | mt-Tt   | Nrn1            | -0.610300306 |
| 1446 | mt-Tt   | Uppt            | -0.651921824 |
| 1447 | mt-Tt   | Nsun3           | -0.673017501 |
| 1448 | mt-Tt   | Nr4a1           | -0.747000222 |
| 1449 | mt-Tt   | BC023105        | -0.605373598 |
| 1450 | mt-Tt   | Egr1            | -0.687631153 |
| 1451 | mt-Tt   | Fos             | -0.695614744 |
| 1452 | mt-Tt   | G530011O06Rik   | -0.740456125 |
| 1453 | mt-Tt   | Gm5346          | -0.657448885 |
| 1454 | mt-Tt   | Gm5912          | -0.651967258 |
| 1455 | mt-Tt   | Murc            | -0.859660173 |
| 1456 | Gm20831 | Snord116        | 0.613856901  |
| 1457 | Gm20831 | mt-Tc           | 0.613856901  |
| 1458 | Gm20831 | Olf166          | 0.613856901  |
| 1459 | Gm20831 | Snord116 // Ipw | 0.613856901  |
| 1460 | Gm20831 | Gm22510         | 0.613856901  |
| 1461 | Gm20831 | Rnu1b1          | 0.613856901  |
| 1462 | Gm20831 | Gm22155         | 0.613856901  |
| 1463 | Gm20831 | Olf1231         | 0.613856901  |
| 1464 | Gm20831 | Gm4787          | 0.605277579  |
| 1465 | Gm20831 | Gm20806         | 0.603370638  |
| 1466 | Gm20831 | Ipw             | 0.613856901  |
| 1467 | Gm20831 | Olf1034         | 0.613856901  |
| 1468 | Gm20831 | Gm21943         | 0.613856901  |

|      |         |               |              |
|------|---------|---------------|--------------|
| 1469 | Gm20831 | LOC102640399  | 0.613856901  |
| 1470 | Gm20831 | mt-Tf         | 0.613856901  |
| 1471 | Gm20831 | Gm20815       | 0.613856901  |
| 1472 | Gm20831 | mt-Ts1        | 0.613856901  |
| 1473 | Gm20831 | mt-Ty         | 0.613856901  |
| 1474 | Gm20831 | Gm24624       | 0.601008593  |
| 1475 | Gm20831 | LOC102633726  | 0.610520962  |
| 1476 | Gm20831 | Gm20747       | 0.607448307  |
| 1477 | Gm20831 | Trdn          | 0.613856901  |
| 1478 | Gm20831 | Snora74a      | 0.613856901  |
| 1479 | Gm20831 | mt-Ts2        | 0.613856901  |
| 1480 | Gm20831 | Gm22866       | 0.613856901  |
| 1481 | Gm20831 | Rnu12         | 0.613856901  |
| 1482 | Gm20831 | Tmeff1        | 0.613856901  |
| 1483 | Gm20831 | Gm23928       | 0.602562509  |
| 1484 | Gm20831 | LOC102639563  | 0.612052689  |
| 1485 | Gm20831 | Vaultc5       | 0.613856901  |
| 1486 | Gm20831 | Inmt          | 0.613856901  |
| 1487 | Gm20831 | Fam107a       | 0.613856901  |
| 1488 | Gm20831 | mt-Tk         | 0.613856901  |
| 1489 | Gm20831 | Brox          | 0.613856901  |
| 1490 | Gm20831 | Glr3          | 0.613856901  |
| 1491 | Gm20831 | mt-Th         | 0.613856901  |
| 1492 | Gm20831 | Ddit4         | 0.613856901  |
| 1493 | Gm20831 | mt-Tp         | 0.613856901  |
| 1494 | Gm20831 | mt-Ta         | 0.613856901  |
| 1495 | Gm20831 | Mpv17         | -0.61068715  |
| 1496 | Gm20831 | Gm6245        | -0.613856901 |
| 1497 | Gm20831 | Cd59a         | -0.613856901 |
| 1498 | Gm20831 | Tmem159       | -0.60103159  |
| 1499 | Gm20831 | Acot2         | -0.613856901 |
| 1500 | Gm20831 | Dhdh          | -0.613856901 |
| 1501 | Gm20831 | Fam213a       | -0.613856901 |
| 1502 | Gm20831 | Nmnat1        | -0.605873152 |
| 1503 | Gm20831 | Coq5          | -0.613856901 |
| 1504 | Gm20831 | Tmem184c      | -0.613856901 |
| 1505 | Gm20831 | Nrn1          | -0.610300306 |
| 1506 | Gm20831 | Uprt          | -0.613856901 |
| 1507 | Gm20831 | Nsun3         | -0.613856901 |
| 1508 | Gm20831 | Gm10718       | -0.609800071 |
| 1509 | Gm20831 | Nr4a1         | -0.613856901 |
| 1510 | Gm20831 | Egr1          | -0.613856901 |
| 1511 | Gm20831 | Fos           | -0.613856901 |
| 1512 | Gm20831 | G530011O06Rik | -0.613856901 |
| 1513 | Gm20831 | Gm5346        | -0.613856901 |
| 1514 | Gm20831 | Gm5912        | -0.613856901 |

|      |          |                 |              |
|------|----------|-----------------|--------------|
| 1515 | Gm20831  | Murc            | -0.613856901 |
| 1516 | Snord116 | mt-Tc           | 0.725166274  |
| 1517 | Snord116 | Olfr166         | 0.63478488   |
| 1518 | Snord116 | Snord116 // Ipw | 0.695183163  |
| 1519 | Snord116 | Gm22510         | 0.625509447  |
| 1520 | Snord116 | Rnu1b1          | 0.725166274  |
| 1521 | Snord116 | Gm22155         | 0.725166274  |
| 1522 | Snord116 | Olfr1231        | 0.618922514  |
| 1523 | Snord116 | Gm4787          | 0.605277579  |
| 1524 | Snord116 | Gm20806         | 0.603370638  |
| 1525 | Snord116 | Ipw             | 0.679543558  |
| 1526 | Snord116 | Olfr1034        | 0.662686071  |
| 1527 | Snord116 | Gm21943         | 0.62432152   |
| 1528 | Snord116 | LOC102640399    | 0.653001706  |
| 1529 | Snord116 | Gm10375         | 0.616879434  |
| 1530 | Snord116 | mt-Tf           | 0.725166274  |
| 1531 | Snord116 | Gm23947         | 0.642276287  |
| 1532 | Snord116 | Gm20815         | 0.624089122  |
| 1533 | Snord116 | mt-Ts1          | 0.725166274  |
| 1534 | Snord116 | mt-Ty           | 0.725166274  |
| 1535 | Snord116 | Gm24624         | 0.601008593  |
| 1536 | Snord116 | LOC102633726    | 0.610520962  |
| 1537 | Snord116 | Gm20747         | 0.607448307  |
| 1538 | Snord116 | Trdn            | 0.662913558  |
| 1539 | Snord116 | Snora74a        | 0.716709874  |
| 1540 | Snord116 | mt-Ts2          | 0.725166274  |
| 1541 | Snord116 | Gm22866         | 0.725166274  |
| 1542 | Snord116 | Rnu12           | 0.714196988  |
| 1543 | Snord116 | Tmeff1          | 0.65030418   |
| 1544 | Snord116 | Gm23928         | 0.602562509  |
| 1545 | Snord116 | LOC102639563    | 0.612052689  |
| 1546 | Snord116 | Vaultre5        | 0.725166274  |
| 1547 | Snord116 | Inmt            | 0.646471019  |
| 1548 | Snord116 | Fam107a         | 0.645410606  |
| 1549 | Snord116 | mt-Tk           | 0.720414242  |
| 1550 | Snord116 | Brox            | 0.657411274  |
| 1551 | Snord116 | Glr3            | 0.616971069  |
| 1552 | Snord116 | mt-Th           | 0.66178471   |
| 1553 | Snord116 | Ddit4           | 0.63226978   |
| 1554 | Snord116 | mt-Tp           | 0.667405111  |
| 1555 | Snord116 | mt-Ta           | 0.680121023  |
| 1556 | Snord116 | Mpv17           | -0.61068715  |
| 1557 | Snord116 | Gm6245          | -0.638394295 |
| 1558 | Snord116 | Cd59a           | -0.637322477 |
| 1559 | Snord116 | Tmem159         | -0.60103159  |
| 1560 | Snord116 | Acot2           | -0.679628534 |

|      |          |                 |              |
|------|----------|-----------------|--------------|
| 1561 | Snord116 | Dhdh            | -0.622508261 |
| 1562 | Snord116 | Fam213a         | -0.643220229 |
| 1563 | Snord116 | Nmnat1          | -0.605873152 |
| 1564 | Snord116 | Coq5            | -0.677305385 |
| 1565 | Snord116 | Tmem184c        | -0.651508083 |
| 1566 | Snord116 | Nrn1            | -0.610300306 |
| 1567 | Snord116 | Uprt            | -0.651921824 |
| 1568 | Snord116 | Nsun3           | -0.673017501 |
| 1569 | Snord116 | Gm10718         | -0.609800071 |
| 1570 | Snord116 | Nr4a1           | -0.725166274 |
| 1571 | Snord116 | BC023105        | -0.605373598 |
| 1572 | Snord116 | Egr1            | -0.704399843 |
| 1573 | Snord116 | Fos             | -0.695614744 |
| 1574 | Snord116 | G530011O06Rik   | -0.716249925 |
| 1575 | Snord116 | Gm5346          | -0.657448885 |
| 1576 | Snord116 | Gm5912          | -0.651967258 |
| 1577 | Snord116 | Murc            | -0.725166274 |
| 1578 | mt-Tc    | Olfr166         | 0.63478488   |
| 1579 | mt-Tc    | Snord116 // Ipw | 0.695183163  |
| 1580 | mt-Tc    | Gm22510         | 0.625509447  |
| 1581 | mt-Tc    | Rnu1b1          | 0.847530386  |
| 1582 | mt-Tc    | Gm22155         | 0.753346542  |
| 1583 | mt-Tc    | Olfr1231        | 0.618922514  |
| 1584 | mt-Tc    | Gm4787          | 0.605277579  |
| 1585 | mt-Tc    | Gm20806         | 0.603370638  |
| 1586 | mt-Tc    | Ipw             | 0.679543558  |
| 1587 | mt-Tc    | Olfr1034        | 0.662686071  |
| 1588 | mt-Tc    | Gm21943         | 0.62432152   |
| 1589 | mt-Tc    | LOC102640399    | 0.653001706  |
| 1590 | mt-Tc    | mt-Tf           | 0.843977183  |
| 1591 | mt-Tc    | Gm23947         | 0.642276287  |
| 1592 | mt-Tc    | Gm20815         | 0.624089122  |
| 1593 | mt-Tc    | mt-Ts1          | 0.823514957  |
| 1594 | mt-Tc    | mt-Ty           | 0.792687001  |
| 1595 | mt-Tc    | Gm24624         | 0.601008593  |
| 1596 | mt-Tc    | LOC102633726    | 0.610520962  |
| 1597 | mt-Tc    | Gm20747         | 0.607448307  |
| 1598 | mt-Tc    | Trdn            | 0.662913558  |
| 1599 | mt-Tc    | Snora74a        | 0.716709874  |
| 1600 | mt-Tc    | mt-Ts2          | 0.822093546  |
| 1601 | mt-Tc    | Gm22866         | 0.810797753  |
| 1602 | mt-Tc    | Rnu12           | 0.714196988  |
| 1603 | mt-Tc    | Gm22749         | 0.634337211  |
| 1604 | mt-Tc    | Tmeff1          | 0.65030418   |
| 1605 | mt-Tc    | Gm23928         | 0.602562509  |
| 1606 | mt-Tc    | LOC102639563    | 0.612052689  |



|      |         |                 |              |
|------|---------|-----------------|--------------|
| 1607 | mt-Tc   | Vaultre5        | 0.728238836  |
| 1608 | mt-Tc   | Inmt            | 0.646471019  |
| 1609 | mt-Tc   | Fam107a         | 0.645410606  |
| 1610 | mt-Tc   | mt-Tk           | 0.720414242  |
| 1611 | mt-Tc   | Brox            | 0.644665592  |
| 1612 | mt-Tc   | Glrx3           | 0.616971069  |
| 1613 | mt-Tc   | mt-Th           | 0.66178471   |
| 1614 | mt-Tc   | Ddit4           | 0.63226978   |
| 1615 | mt-Tc   | mt-Tp           | 0.667405111  |
| 1616 | mt-Tc   | mt-Ta           | 0.680121023  |
| 1617 | mt-Tc   | Mpv17           | -0.61068715  |
| 1618 | mt-Tc   | Gm6245          | -0.638394295 |
| 1619 | mt-Tc   | Cd59a           | -0.637322477 |
| 1620 | mt-Tc   | Tmem159         | -0.60103159  |
| 1621 | mt-Tc   | Acot2           | -0.679628534 |
| 1622 | mt-Tc   | Dhdh            | -0.622508261 |
| 1623 | mt-Tc   | Fam213a         | -0.643220229 |
| 1624 | mt-Tc   | Nmnat1          | -0.605873152 |
| 1625 | mt-Tc   | Coq5            | -0.677305385 |
| 1626 | mt-Tc   | Tmem184c        | -0.651508083 |
| 1627 | mt-Tc   | Nrn1            | -0.610300306 |
| 1628 | mt-Tc   | Uppt            | -0.651921824 |
| 1629 | mt-Tc   | Nsun3           | -0.673017501 |
| 1630 | mt-Tc   | Nr4a1           | -0.747000222 |
| 1631 | mt-Tc   | BC023105        | -0.605373598 |
| 1632 | mt-Tc   | Egr1            | -0.614853621 |
| 1633 | mt-Tc   | Fos             | -0.658077623 |
| 1634 | mt-Tc   | G530011O06Rik   | -0.663459858 |
| 1635 | mt-Tc   | Gm5346          | -0.657448885 |
| 1636 | mt-Tc   | Gm5912          | -0.651967258 |
| 1637 | mt-Tc   | Murc            | -0.847530386 |
| 1638 | Olfr166 | Snord116 // Ipw | 0.63478488   |
| 1639 | Olfr166 | Gm22510         | 0.625509447  |
| 1640 | Olfr166 | Rnu1b1          | 0.63478488   |
| 1641 | Olfr166 | Gm22155         | 0.63478488   |
| 1642 | Olfr166 | Olfr1231        | 0.618922514  |
| 1643 | Olfr166 | Gm4787          | 0.605277579  |
| 1644 | Olfr166 | Gm20806         | 0.603370638  |
| 1645 | Olfr166 | Ipw             | 0.63478488   |
| 1646 | Olfr166 | Olfr1034        | 0.63478488   |
| 1647 | Olfr166 | Gm21943         | 0.62432152   |
| 1648 | Olfr166 | LOC102640399    | 0.63478488   |
| 1649 | Olfr166 | Gm10375         | 0.616879434  |
| 1650 | Olfr166 | mt-Tf           | 0.63478488   |
| 1651 | Olfr166 | Gm20815         | 0.624089122  |
| 1652 | Olfr166 | mt-Ts1          | 0.63478488   |

|      |                 |               |              |
|------|-----------------|---------------|--------------|
| 1653 | Olfr166         | mt-Ty         | 0.63478488   |
| 1654 | Olfr166         | Gm24624       | 0.601008593  |
| 1655 | Olfr166         | LOC102633726  | 0.610520962  |
| 1656 | Olfr166         | Gm20747       | 0.607448307  |
| 1657 | Olfr166         | mt-Ts2        | 0.63478488   |
| 1658 | Olfr166         | Gm22866       | 0.63478488   |
| 1659 | Olfr166         | Rnu12         | 0.63478488   |
| 1660 | Olfr166         | Ppp4r2        | 0.63478488   |
| 1661 | Olfr166         | Tmeff1        | 0.63478488   |
| 1662 | Olfr166         | Gm23928       | 0.602562509  |
| 1663 | Olfr166         | LOC102639563  | 0.612052689  |
| 1664 | Olfr166         | Vaultre5      | 0.63478488   |
| 1665 | Olfr166         | Inmt          | 0.63478488   |
| 1666 | Olfr166         | Fam107a       | 0.63478488   |
| 1667 | Olfr166         | mt-Tk         | 0.63478488   |
| 1668 | Olfr166         | Brox          | 0.63478488   |
| 1669 | Olfr166         | Glr3          | 0.616971069  |
| 1670 | Olfr166         | mt-Th         | 0.63478488   |
| 1671 | Olfr166         | Ddit4         | 0.63226978   |
| 1672 | Olfr166         | mt-Tp         | 0.63478488   |
| 1673 | Olfr166         | mt-Ta         | 0.63478488   |
| 1674 | Olfr166         | Mpv17         | -0.61068715  |
| 1675 | Olfr166         | Gm6245        | -0.63478488  |
| 1676 | Olfr166         | Cd59a         | -0.63478488  |
| 1677 | Olfr166         | Tmem159       | -0.60103159  |
| 1678 | Olfr166         | Acot2         | -0.63478488  |
| 1679 | Olfr166         | Dhdh          | -0.622508261 |
| 1680 | Olfr166         | Fam213a       | -0.63478488  |
| 1681 | Olfr166         | Nmnat1        | -0.605873152 |
| 1682 | Olfr166         | Coq5          | -0.63478488  |
| 1683 | Olfr166         | Tmem184c      | -0.63478488  |
| 1684 | Olfr166         | Nrn1          | -0.610300306 |
| 1685 | Olfr166         | Uprt          | -0.63478488  |
| 1686 | Olfr166         | Nsun3         | -0.63478488  |
| 1687 | Olfr166         | Gm10718       | -0.609800071 |
| 1688 | Olfr166         | Nr4a1         | -0.63478488  |
| 1689 | Olfr166         | Egr1          | -0.63478488  |
| 1690 | Olfr166         | Fos           | -0.63478488  |
| 1691 | Olfr166         | G530011O06Rik | -0.63478488  |
| 1692 | Olfr166         | Gm5346        | -0.63478488  |
| 1693 | Olfr166         | Murc          | -0.63478488  |
| 1694 | Snord116 // Ipw | Gm22510       | 0.625509447  |
| 1695 | Snord116 // Ipw | Rnu1b1        | 0.695183163  |
| 1696 | Snord116 // Ipw | Gm22155       | 0.695183163  |
| 1697 | Snord116 // Ipw | Olfr1231      | 0.618922514  |
| 1698 | Snord116 // Ipw | Gm4787        | 0.605277579  |

|      |                 |              |              |
|------|-----------------|--------------|--------------|
| 1699 | Snord116 // Ipw | Gm20806      | 0.603370638  |
| 1700 | Snord116 // Ipw | Ipw          | 0.679543558  |
| 1701 | Snord116 // Ipw | Olfr1034     | 0.662686071  |
| 1702 | Snord116 // Ipw | Gm21943      | 0.62432152   |
| 1703 | Snord116 // Ipw | LOC102640399 | 0.653001706  |
| 1704 | Snord116 // Ipw | mt-Tf        | 0.695183163  |
| 1705 | Snord116 // Ipw | Gm23947      | 0.642276287  |
| 1706 | Snord116 // Ipw | Gm20815      | 0.624089122  |
| 1707 | Snord116 // Ipw | mt-Ts1       | 0.695183163  |
| 1708 | Snord116 // Ipw | mt-Ty        | 0.695183163  |
| 1709 | Snord116 // Ipw | Gm24624      | 0.601008593  |
| 1710 | Snord116 // Ipw | LOC102633726 | 0.610520962  |
| 1711 | Snord116 // Ipw | Gm20747      | 0.607448307  |
| 1712 | Snord116 // Ipw | Snora74a     | 0.695183163  |
| 1713 | Snord116 // Ipw | mt-Ts2       | 0.695183163  |
| 1714 | Snord116 // Ipw | Gm22866      | 0.695183163  |
| 1715 | Snord116 // Ipw | Rnu12        | 0.695183163  |
| 1716 | Snord116 // Ipw | Tmeff1       | 0.65030418   |
| 1717 | Snord116 // Ipw | Gm23928      | 0.602562509  |
| 1718 | Snord116 // Ipw | LOC102639563 | 0.612052689  |
| 1719 | Snord116 // Ipw | Vaultrc5     | 0.695183163  |
| 1720 | Snord116 // Ipw | Inmt         | 0.646471019  |
| 1721 | Snord116 // Ipw | Fam107a      | 0.645410606  |
| 1722 | Snord116 // Ipw | mt-Tk        | 0.695183163  |
| 1723 | Snord116 // Ipw | Glr3         | 0.616971069  |
| 1724 | Snord116 // Ipw | mt-Th        | 0.66178471   |
| 1725 | Snord116 // Ipw | Ddit4        | 0.63226978   |
| 1726 | Snord116 // Ipw | mt-Tp        | 0.667405111  |
| 1727 | Snord116 // Ipw | mt-Ta        | 0.680121023  |
| 1728 | Snord116 // Ipw | Mpv17        | -0.61068715  |
| 1729 | Snord116 // Ipw | Gm6245       | -0.638394295 |
| 1730 | Snord116 // Ipw | Cd59a        | -0.637322477 |
| 1731 | Snord116 // Ipw | Tmem159      | -0.60103159  |
| 1732 | Snord116 // Ipw | Acot2        | -0.679628534 |
| 1733 | Snord116 // Ipw | Dhdh         | -0.622508261 |
| 1734 | Snord116 // Ipw | Fam213a      | -0.643220229 |
| 1735 | Snord116 // Ipw | Nmnat1       | -0.605873152 |
| 1736 | Snord116 // Ipw | Coq5         | -0.677305385 |
| 1737 | Snord116 // Ipw | Tmem184c     | -0.651508083 |
| 1738 | Snord116 // Ipw | Nrn1         | -0.610300306 |
| 1739 | Snord116 // Ipw | Uprt         | -0.651921824 |
| 1740 | Snord116 // Ipw | Nsun3        | -0.673017501 |
| 1741 | Snord116 // Ipw | Gm10718      | -0.609800071 |
| 1742 | Snord116 // Ipw | Nr4a1        | -0.695183163 |
| 1743 | Snord116 // Ipw | BC023105     | -0.605373598 |
| 1744 | Snord116 // Ipw | Egr1         | -0.695183163 |

|      |                 |              |              |
|------|-----------------|--------------|--------------|
| 1745 | Snord116 // Ipw | Fos          | -0.695183163 |
| 1746 | Snord116 // Ipw | Gm5346       | -0.6243902   |
| 1747 | Snord116 // Ipw | Gm5912       | -0.651967258 |
| 1748 | Snord116 // Ipw | Murc         | -0.695183163 |
| 1749 | Gm22510         | Rnu1b1       | 0.625509447  |
| 1750 | Gm22510         | Myl4         | 0.625509447  |
| 1751 | Gm22510         | Gm22155      | 0.625509447  |
| 1752 | Gm22510         | Gm20806      | 0.603370638  |
| 1753 | Gm22510         | Ipw          | 0.625509447  |
| 1754 | Gm22510         | Olf1034      | 0.625509447  |
| 1755 | Gm22510         | Gm21943      | 0.62432152   |
| 1756 | Gm22510         | LOC102640399 | 0.625509447  |
| 1757 | Gm22510         | mt-Tf        | 0.625509447  |
| 1758 | Gm22510         | Gm20815      | 0.624089122  |
| 1759 | Gm22510         | mt-Ts1       | 0.625509447  |
| 1760 | Gm22510         | mt-Ty        | 0.625509447  |
| 1761 | Gm22510         | Gm24624      | 0.601008593  |
| 1762 | Gm22510         | LOC102633726 | 0.610520962  |
| 1763 | Gm22510         | Gm20747      | 0.607448307  |
| 1764 | Gm22510         | mt-Ts2       | 0.625509447  |
| 1765 | Gm22510         | Gm22866      | 0.625509447  |
| 1766 | Gm22510         | Rnu12        | 0.625509447  |
| 1767 | Gm22510         | Tmeff1       | 0.625509447  |
| 1768 | Gm22510         | LOC102639563 | 0.612052689  |
| 1769 | Gm22510         | mt-Tk        | 0.625509447  |
| 1770 | Gm22510         | Glr3         | 0.616971069  |
| 1771 | Gm22510         | mt-Th        | 0.625509447  |
| 1772 | Gm22510         | Ddit4        | 0.625509447  |
| 1773 | Gm22510         | mt-Tp        | 0.625509447  |
| 1774 | Gm22510         | mt-Ta        | 0.625509447  |
| 1775 | Gm22510         | Gm6245       | -0.617235028 |
| 1776 | Gm22510         | Tmem159      | -0.60103159  |
| 1777 | Gm22510         | Fam213a      | -0.625509447 |
| 1778 | Gm22510         | Nmnat1       | -0.605873152 |
| 1779 | Gm22510         | Coq5         | -0.625509447 |
| 1780 | Gm22510         | Uprt         | -0.625509447 |
| 1781 | Gm22510         | Gm10718      | -0.609800071 |
| 1782 | Gm22510         | Nr4a1        | -0.625509447 |
| 1783 | Gm22510         | Egr1         | -0.625509447 |
| 1784 | Gm22510         | Fos          | -0.625509447 |
| 1785 | Gm22510         | Gm5912       | -0.625509447 |
| 1786 | Gm22510         | Murc         | -0.625509447 |
| 1787 | Rnu1b1          | Gm22155      | 0.753346542  |
| 1788 | Rnu1b1          | Olf1231      | 0.618922514  |
| 1789 | Rnu1b1          | Gm4787       | 0.605277579  |
| 1790 | Rnu1b1          | Gm20806      | 0.603370638  |

|      |        |              |              |
|------|--------|--------------|--------------|
| 1791 | Rnu1b1 | Ipw          | 0.679543558  |
| 1792 | Rnu1b1 | Olfr1034     | 0.662686071  |
| 1793 | Rnu1b1 | Gm21943      | 0.62432152   |
| 1794 | Rnu1b1 | LOC102640399 | 0.653001706  |
| 1795 | Rnu1b1 | mt-Tf        | 0.843977183  |
| 1796 | Rnu1b1 | Gm23947      | 0.642276287  |
| 1797 | Rnu1b1 | Gm20815      | 0.624089122  |
| 1798 | Rnu1b1 | mt-Ts1       | 0.823514957  |
| 1799 | Rnu1b1 | mt-Ty        | 0.792687001  |
| 1800 | Rnu1b1 | Gm24624      | 0.601008593  |
| 1801 | Rnu1b1 | LOC102633726 | 0.610520962  |
| 1802 | Rnu1b1 | Gm20747      | 0.607448307  |
| 1803 | Rnu1b1 | Trdn         | 0.64121884   |
| 1804 | Rnu1b1 | Snora74a     | 0.716709874  |
| 1805 | Rnu1b1 | mt-Ts2       | 0.822093546  |
| 1806 | Rnu1b1 | Gm22866      | 0.810797753  |
| 1807 | Rnu1b1 | Rnu12        | 0.714196988  |
| 1808 | Rnu1b1 | Gm22749      | 0.612863749  |
| 1809 | Rnu1b1 | Tmeff1       | 0.65030418   |
| 1810 | Rnu1b1 | Gm23928      | 0.602562509  |
| 1811 | Rnu1b1 | LOC102639563 | 0.612052689  |
| 1812 | Rnu1b1 | Vaultre5     | 0.728238836  |
| 1813 | Rnu1b1 | Inmt         | 0.646471019  |
| 1814 | Rnu1b1 | Fam107a      | 0.645410606  |
| 1815 | Rnu1b1 | mt-Tk        | 0.720414242  |
| 1816 | Rnu1b1 | Glx3         | 0.616971069  |
| 1817 | Rnu1b1 | mt-Th        | 0.66178471   |
| 1818 | Rnu1b1 | Ddit4        | 0.63226978   |
| 1819 | Rnu1b1 | mt-Tp        | 0.667405111  |
| 1820 | Rnu1b1 | mt-Ta        | 0.680121023  |
| 1821 | Rnu1b1 | Mpv17        | -0.61068715  |
| 1822 | Rnu1b1 | Gm6245       | -0.638394295 |
| 1823 | Rnu1b1 | Cd59a        | -0.637322477 |
| 1824 | Rnu1b1 | Tmem159      | -0.60103159  |
| 1825 | Rnu1b1 | Acot2        | -0.679628534 |
| 1826 | Rnu1b1 | Dhdh         | -0.622508261 |
| 1827 | Rnu1b1 | Fam213a      | -0.643220229 |
| 1828 | Rnu1b1 | Nmnat1       | -0.605873152 |
| 1829 | Rnu1b1 | Coq5         | -0.677305385 |
| 1830 | Rnu1b1 | Tmem184c     | -0.651508083 |
| 1831 | Rnu1b1 | Nrn1         | -0.610300306 |
| 1832 | Rnu1b1 | Uppt         | -0.651921824 |
| 1833 | Rnu1b1 | Nsun3        | -0.673017501 |
| 1834 | Rnu1b1 | Nr4a1        | -0.67405666  |
| 1835 | Rnu1b1 | BC023105     | -0.605373598 |
| 1836 | Rnu1b1 | Gm5346       | -0.657448885 |

|      |         |              |              |
|------|---------|--------------|--------------|
| 1837 | Rnu1b1  | Gm5912       | -0.651967258 |
| 1838 | Rnu1b1  | Murc         | -0.88953734  |
| 1839 | Myl4    | Gm20815      | 0.618753345  |
| 1840 | Myl4    | Gm20747      | 0.607448307  |
| 1841 | Myl4    | Gm10718      | -0.609800071 |
| 1842 | Gm22155 | Olfr1231     | 0.618922514  |
| 1843 | Gm22155 | Gm20806      | 0.603370638  |
| 1844 | Gm22155 | Ipw          | 0.679543558  |
| 1845 | Gm22155 | Olfr1034     | 0.662686071  |
| 1846 | Gm22155 | Gm21943      | 0.62432152   |
| 1847 | Gm22155 | LOC102640399 | 0.653001706  |
| 1848 | Gm22155 | mt-Tf        | 0.753346542  |
| 1849 | Gm22155 | Gm23947      | 0.642276287  |
| 1850 | Gm22155 | Gm20815      | 0.624089122  |
| 1851 | Gm22155 | mt-Ts1       | 0.753346542  |
| 1852 | Gm22155 | mt-Ty        | 0.753346542  |
| 1853 | Gm22155 | Gm24624      | 0.601008593  |
| 1854 | Gm22155 | LOC102633726 | 0.610520962  |
| 1855 | Gm22155 | Gm20747      | 0.607448307  |
| 1856 | Gm22155 | Snora74a     | 0.716709874  |
| 1857 | Gm22155 | mt-Ts2       | 0.753346542  |
| 1858 | Gm22155 | Gm22866      | 0.753346542  |
| 1859 | Gm22155 | Rnu12        | 0.714196988  |
| 1860 | Gm22155 | Gm22749      | 0.608771096  |
| 1861 | Gm22155 | Tmeff1       | 0.65030418   |
| 1862 | Gm22155 | Gm23928      | 0.602562509  |
| 1863 | Gm22155 | LOC102639563 | 0.612052689  |
| 1864 | Gm22155 | Vaultc5      | 0.728238836  |
| 1865 | Gm22155 | Inmt         | 0.646471019  |
| 1866 | Gm22155 | Fam107a      | 0.645410606  |
| 1867 | Gm22155 | mt-Tk        | 0.720414242  |
| 1868 | Gm22155 | Glr3         | 0.616971069  |
| 1869 | Gm22155 | mt-Th        | 0.66178471   |
| 1870 | Gm22155 | Ddit4        | 0.63226978   |
| 1871 | Gm22155 | mt-Tp        | 0.667405111  |
| 1872 | Gm22155 | mt-Ta        | 0.680121023  |
| 1873 | Gm22155 | Mpv17        | -0.61068715  |
| 1874 | Gm22155 | Gm6245       | -0.638394295 |
| 1875 | Gm22155 | Cd59a        | -0.637322477 |
| 1876 | Gm22155 | Tmem159      | -0.60103159  |
| 1877 | Gm22155 | Acot2        | -0.679628534 |
| 1878 | Gm22155 | Dhdh         | -0.622508261 |
| 1879 | Gm22155 | Fam213a      | -0.643220229 |
| 1880 | Gm22155 | Nmnat1       | -0.605873152 |
| 1881 | Gm22155 | Coq5         | -0.677305385 |
| 1882 | Gm22155 | Tmem184c     | -0.651508083 |

|      |          |               |              |
|------|----------|---------------|--------------|
| 1883 | Gm22155  | Nrn1          | -0.610300306 |
| 1884 | Gm22155  | Uprt          | -0.651921824 |
| 1885 | Gm22155  | Nsun3         | -0.673017501 |
| 1886 | Gm22155  | Nr4a1         | -0.747000222 |
| 1887 | Gm22155  | BC023105      | -0.605373598 |
| 1888 | Gm22155  | Egr1          | -0.619063383 |
| 1889 | Gm22155  | Fos           | -0.66127862  |
| 1890 | Gm22155  | G530011O06Rik | -0.700359365 |
| 1891 | Gm22155  | Gm5346        | -0.657448885 |
| 1892 | Gm22155  | Gm5912        | -0.651967258 |
| 1893 | Gm22155  | Murc          | -0.753346542 |
| 1894 | Olfr1231 | Gm4787        | 0.605277579  |
| 1895 | Olfr1231 | Gm20806       | 0.603370638  |
| 1896 | Olfr1231 | Ipw           | 0.618922514  |
| 1897 | Olfr1231 | Olfr1034      | 0.618922514  |
| 1898 | Olfr1231 | Gm21943       | 0.618922514  |
| 1899 | Olfr1231 | LOC102640399  | 0.618922514  |
| 1900 | Olfr1231 | Gm10375       | 0.616879434  |
| 1901 | Olfr1231 | mt-Tf         | 0.618922514  |
| 1902 | Olfr1231 | Gm23947       | 0.618922514  |
| 1903 | Olfr1231 | Gm20815       | 0.618922514  |
| 1904 | Olfr1231 | mt-Ts1        | 0.618922514  |
| 1905 | Olfr1231 | mt-Ty         | 0.618922514  |
| 1906 | Olfr1231 | Gm24624       | 0.601008593  |
| 1907 | Olfr1231 | LOC102633726  | 0.610520962  |
| 1908 | Olfr1231 | Gm20747       | 0.607448307  |
| 1909 | Olfr1231 | Trdn          | 0.618922514  |
| 1910 | Olfr1231 | Snora74a      | 0.618922514  |
| 1911 | Olfr1231 | mt-Ts2        | 0.618922514  |
| 1912 | Olfr1231 | Gm22866       | 0.618922514  |
| 1913 | Olfr1231 | Rnu12         | 0.618922514  |
| 1914 | Olfr1231 | Ppp4r2        | 0.618922514  |
| 1915 | Olfr1231 | Gm22749       | 0.618922514  |
| 1916 | Olfr1231 | Tmeff1        | 0.618922514  |
| 1917 | Olfr1231 | Gm23928       | 0.602562509  |
| 1918 | Olfr1231 | LOC102639563  | 0.612052689  |
| 1919 | Olfr1231 | Vaultc5       | 0.618922514  |
| 1920 | Olfr1231 | Inmt          | 0.618922514  |
| 1921 | Olfr1231 | Fam107a       | 0.618922514  |
| 1922 | Olfr1231 | mt-Tk         | 0.618922514  |
| 1923 | Olfr1231 | Brox          | 0.618922514  |
| 1924 | Olfr1231 | Glr3          | 0.616971069  |
| 1925 | Olfr1231 | mt-Th         | 0.618922514  |
| 1926 | Olfr1231 | Ddit4         | 0.618922514  |
| 1927 | Olfr1231 | mt-Tp         | 0.618922514  |
| 1928 | Olfr1231 | mt-Ta         | 0.618922514  |

|      |          |               |              |
|------|----------|---------------|--------------|
| 1929 | Olfr1231 | Mpv17         | -0.61068715  |
| 1930 | Olfr1231 | Gm6245        | -0.618922514 |
| 1931 | Olfr1231 | Cd59a         | -0.618922514 |
| 1932 | Olfr1231 | Tmem159       | -0.60103159  |
| 1933 | Olfr1231 | Acot2         | -0.618922514 |
| 1934 | Olfr1231 | Dhdh          | -0.618922514 |
| 1935 | Olfr1231 | Fam213a       | -0.618922514 |
| 1936 | Olfr1231 | Nmnat1        | -0.605873152 |
| 1937 | Olfr1231 | Coq5          | -0.618922514 |
| 1938 | Olfr1231 | Tmem184c      | -0.618922514 |
| 1939 | Olfr1231 | Nrn1          | -0.610300306 |
| 1940 | Olfr1231 | Uprt          | -0.618922514 |
| 1941 | Olfr1231 | Nsun3         | -0.618922514 |
| 1942 | Olfr1231 | Nr4a1         | -0.618922514 |
| 1943 | Olfr1231 | BC023105      | -0.605373598 |
| 1944 | Olfr1231 | Fos           | -0.618922514 |
| 1945 | Olfr1231 | G530011O06Rik | -0.618922514 |
| 1946 | Olfr1231 | Gm5346        | -0.618922514 |
| 1947 | Olfr1231 | Gm5912        | -0.618922514 |
| 1948 | Olfr1231 | Murc          | -0.618922514 |
| 1949 | Gm4787   | Gm20806       | 0.603370638  |
| 1950 | Gm4787   | Ipw           | 0.605277579  |
| 1951 | Gm4787   | Olfr1034      | 0.605277579  |
| 1952 | Gm4787   | Gm21943       | 0.605277579  |
| 1953 | Gm4787   | LOC102640399  | 0.605277579  |
| 1954 | Gm4787   | Gm10375       | 0.605277579  |
| 1955 | Gm4787   | mt-Tf         | 0.605277579  |
| 1956 | Gm4787   | Gm23947       | 0.605277579  |
| 1957 | Gm4787   | Gm20815       | 0.605277579  |
| 1958 | Gm4787   | mt-Ts1        | 0.605277579  |
| 1959 | Gm4787   | mt-Ty         | 0.605277579  |
| 1960 | Gm4787   | Gm24624       | 0.601008593  |
| 1961 | Gm4787   | LOC102633726  | 0.605277579  |
| 1962 | Gm4787   | Gm20747       | 0.605277579  |
| 1963 | Gm4787   | Trdn          | 0.605277579  |
| 1964 | Gm4787   | mt-Ts2        | 0.602346686  |
| 1965 | Gm4787   | Gm22866       | 0.605277579  |
| 1966 | Gm4787   | Rnu12         | 0.605277579  |
| 1967 | Gm4787   | Ppp4r2        | 0.605277579  |
| 1968 | Gm4787   | Gm22749       | 0.605277579  |
| 1969 | Gm4787   | Tmeff1        | 0.605277579  |
| 1970 | Gm4787   | Gm23928       | 0.602562509  |
| 1971 | Gm4787   | LOC102639563  | 0.605277579  |
| 1972 | Gm4787   | Vaultc5       | 0.605277579  |
| 1973 | Gm4787   | Inmt          | 0.605277579  |
| 1974 | Gm4787   | Fam107a       | 0.605277579  |



|      |         |               |              |
|------|---------|---------------|--------------|
| 1975 | Gm4787  | mt-Tk         | 0.605277579  |
| 1976 | Gm4787  | Brox          | 0.605277579  |
| 1977 | Gm4787  | Glrx3         | 0.605277579  |
| 1978 | Gm4787  | mt-Th         | 0.605277579  |
| 1979 | Gm4787  | Ddit4         | 0.605277579  |
| 1980 | Gm4787  | mt-Tp         | 0.605277579  |
| 1981 | Gm4787  | mt-Ta         | 0.605277579  |
| 1982 | Gm4787  | Mpv17         | -0.605277579 |
| 1983 | Gm4787  | Gm6245        | -0.605277579 |
| 1984 | Gm4787  | Cd59a         | -0.605277579 |
| 1985 | Gm4787  | Tmem159       | -0.60103159  |
| 1986 | Gm4787  | Acot2         | -0.605277579 |
| 1987 | Gm4787  | Dhdh          | -0.605277579 |
| 1988 | Gm4787  | Fam213a       | -0.605277579 |
| 1989 | Gm4787  | Coq5          | -0.605277579 |
| 1990 | Gm4787  | Tmem184c      | -0.605277579 |
| 1991 | Gm4787  | Nrn1          | -0.605277579 |
| 1992 | Gm4787  | Uppt          | -0.605277579 |
| 1993 | Gm4787  | Nsun3         | -0.605277579 |
| 1994 | Gm4787  | Gm10718       | -0.605277579 |
| 1995 | Gm4787  | Nr4a1         | -0.605277579 |
| 1996 | Gm4787  | Egr1          | -0.605277579 |
| 1997 | Gm4787  | Fos           | -0.605277579 |
| 1998 | Gm4787  | G530011O06Rik | -0.605277579 |
| 1999 | Gm4787  | Gm5346        | -0.605277579 |
| 2000 | Gm4787  | Gm5912        | -0.605277579 |
| 2001 | Gm4787  | Murc          | -0.605277579 |
| 2002 | Gm20806 | Ipw           | 0.603370638  |
| 2003 | Gm20806 | Olfr1034      | 0.603370638  |
| 2004 | Gm20806 | Gm21943       | 0.603370638  |
| 2005 | Gm20806 | LOC102640399  | 0.603370638  |
| 2006 | Gm20806 | Gm10375       | 0.603370638  |
| 2007 | Gm20806 | mt-Tf         | 0.603370638  |
| 2008 | Gm20806 | Gm23947       | 0.603370638  |
| 2009 | Gm20806 | Gm20815       | 0.603370638  |
| 2010 | Gm20806 | mt-Ts1        | 0.603370638  |
| 2011 | Gm20806 | mt-Ty         | 0.603370638  |
| 2012 | Gm20806 | Gm24624       | 0.601008593  |
| 2013 | Gm20806 | LOC102633726  | 0.603370638  |
| 2014 | Gm20806 | Gm20747       | 0.603370638  |
| 2015 | Gm20806 | Trdn          | 0.603370638  |
| 2016 | Gm20806 | Snora74a      | 0.603370638  |
| 2017 | Gm20806 | mt-Ts2        | 0.603370638  |
| 2018 | Gm20806 | Gm22866       | 0.603370638  |
| 2019 | Gm20806 | Rnu12         | 0.603370638  |
| 2020 | Gm20806 | Tmeff1        | 0.603370638  |

|      |         |              |              |
|------|---------|--------------|--------------|
| 2021 | Gm20806 | Gm23928      | 0.602562509  |
| 2022 | Gm20806 | LOC102639563 | 0.603370638  |
| 2023 | Gm20806 | Vaultre5     | 0.603370638  |
| 2024 | Gm20806 | Inmt         | 0.603370638  |
| 2025 | Gm20806 | Fam107a      | 0.603370638  |
| 2026 | Gm20806 | mt-Tk        | 0.603370638  |
| 2027 | Gm20806 | Glrx3        | 0.603370638  |
| 2028 | Gm20806 | mt-Th        | 0.603370638  |
| 2029 | Gm20806 | Ddit4        | 0.603370638  |
| 2030 | Gm20806 | mt-Tp        | 0.603370638  |
| 2031 | Gm20806 | mt-Ta        | 0.603370638  |
| 2032 | Gm20806 | Mpv17        | -0.603370638 |
| 2033 | Gm20806 | Gm6245       | -0.603370638 |
| 2034 | Gm20806 | Cd59a        | -0.603370638 |
| 2035 | Gm20806 | Tmem159      | -0.60103159  |
| 2036 | Gm20806 | Acot2        | -0.603370638 |
| 2037 | Gm20806 | Dhdh         | -0.603370638 |
| 2038 | Gm20806 | Fam213a      | -0.603370638 |
| 2039 | Gm20806 | Nmnat1       | -0.603370638 |
| 2040 | Gm20806 | Coq5         | -0.603370638 |
| 2041 | Gm20806 | Tmem184c     | -0.603370638 |
| 2042 | Gm20806 | Nrn1         | -0.603370638 |
| 2043 | Gm20806 | Uprt         | -0.603370638 |
| 2044 | Gm20806 | Nsun3        | -0.603370638 |
| 2045 | Gm20806 | Gm10718      | -0.603370638 |
| 2046 | Gm20806 | Nr4a1        | -0.603370638 |
| 2047 | Gm20806 | BC023105     | -0.603370638 |
| 2048 | Gm20806 | Gm5346       | -0.603370638 |
| 2049 | Gm20806 | Gm5912       | -0.603370638 |
| 2050 | Gm20806 | Murc         | -0.603370638 |
| 2051 | Ipw     | Olf1034      | 0.662686071  |
| 2052 | Ipw     | Gm21943      | 0.62432152   |
| 2053 | Ipw     | LOC102640399 | 0.653001706  |
| 2054 | Ipw     | Gm10375      | 0.616879434  |
| 2055 | Ipw     | mt-Tf        | 0.679543558  |
| 2056 | Ipw     | Gm23947      | 0.642276287  |
| 2057 | Ipw     | Gm20815      | 0.624089122  |
| 2058 | Ipw     | mt-Ts1       | 0.679543558  |
| 2059 | Ipw     | mt-Ty        | 0.679543558  |
| 2060 | Ipw     | Gm24624      | 0.601008593  |
| 2061 | Ipw     | LOC102633726 | 0.610520962  |
| 2062 | Ipw     | Gm20747      | 0.607448307  |
| 2063 | Ipw     | Trdn         | 0.662913558  |
| 2064 | Ipw     | Snora74a     | 0.679543558  |
| 2065 | Ipw     | mt-Ts2       | 0.679543558  |
| 2066 | Ipw     | Gm22866      | 0.679543558  |

|      |          |               |              |
|------|----------|---------------|--------------|
| 2067 | Ipw      | Rnu12         | 0.679543558  |
| 2068 | Ipw      | Ppp4r2        | 0.679543558  |
| 2069 | Ipw      | Tmeff1        | 0.65030418   |
| 2070 | Ipw      | Gm23928       | 0.602562509  |
| 2071 | Ipw      | LOC102639563  | 0.612052689  |
| 2072 | Ipw      | Vaultrc5      | 0.679543558  |
| 2073 | Ipw      | Inmt          | 0.646471019  |
| 2074 | Ipw      | Fam107a       | 0.645410606  |
| 2075 | Ipw      | mt-Tk         | 0.679543558  |
| 2076 | Ipw      | Brox          | 0.657411274  |
| 2077 | Ipw      | Glr3          | 0.616971069  |
| 2078 | Ipw      | mt-Th         | 0.66178471   |
| 2079 | Ipw      | Ddit4         | 0.63226978   |
| 2080 | Ipw      | mt-Tp         | 0.667405111  |
| 2081 | Ipw      | mt-Ta         | 0.679543558  |
| 2082 | Ipw      | Mpv17         | -0.61068715  |
| 2083 | Ipw      | Gm6245        | -0.638394295 |
| 2084 | Ipw      | Cd59a         | -0.637322477 |
| 2085 | Ipw      | Tmem159       | -0.60103159  |
| 2086 | Ipw      | Acot2         | -0.679543558 |
| 2087 | Ipw      | Dhdh          | -0.622508261 |
| 2088 | Ipw      | Fam213a       | -0.643220229 |
| 2089 | Ipw      | Nmnat1        | -0.605873152 |
| 2090 | Ipw      | Coq5          | -0.677305385 |
| 2091 | Ipw      | Tmem184c      | -0.651508083 |
| 2092 | Ipw      | Nrn1          | -0.610300306 |
| 2093 | Ipw      | Uprt          | -0.651921824 |
| 2094 | Ipw      | Nsun3         | -0.673017501 |
| 2095 | Ipw      | Gm10718       | -0.609800071 |
| 2096 | Ipw      | Nr4a1         | -0.679543558 |
| 2097 | Ipw      | Egr1          | -0.679543558 |
| 2098 | Ipw      | Fos           | -0.679543558 |
| 2099 | Ipw      | G530011O06Rik | -0.679543558 |
| 2100 | Ipw      | Gm5346        | -0.657448885 |
| 2101 | Ipw      | Gm5912        | -0.651967258 |
| 2102 | Ipw      | Murc          | -0.679543558 |
| 2103 | Olfr1034 | Gm21943       | 0.62432152   |
| 2104 | Olfr1034 | LOC102640399  | 0.653001706  |
| 2105 | Olfr1034 | mt-Tf         | 0.662686071  |
| 2106 | Olfr1034 | Gm20815       | 0.624089122  |
| 2107 | Olfr1034 | mt-Ts1        | 0.662686071  |
| 2108 | Olfr1034 | mt-Ty         | 0.662686071  |
| 2109 | Olfr1034 | Gm24624       | 0.601008593  |
| 2110 | Olfr1034 | LOC102633726  | 0.610520962  |
| 2111 | Olfr1034 | Gm20747       | 0.607448307  |
| 2112 | Olfr1034 | Trdn          | 0.605928444  |

|      |          |               |              |
|------|----------|---------------|--------------|
| 2113 | Olfr1034 | Snora74a      | 0.662686071  |
| 2114 | Olfr1034 | mt-Ts2        | 0.662686071  |
| 2115 | Olfr1034 | Gm22866       | 0.662686071  |
| 2116 | Olfr1034 | Rnu12         | 0.662686071  |
| 2117 | Olfr1034 | Ppp4r2        | 0.608536463  |
| 2118 | Olfr1034 | Tmeff1        | 0.65030418   |
| 2119 | Olfr1034 | Gm23928       | 0.602562509  |
| 2120 | Olfr1034 | LOC102639563  | 0.612052689  |
| 2121 | Olfr1034 | Vaultc5       | 0.662686071  |
| 2122 | Olfr1034 | Inmt          | 0.646471019  |
| 2123 | Olfr1034 | Fam107a       | 0.645410606  |
| 2124 | Olfr1034 | mt-Tk         | 0.662686071  |
| 2125 | Olfr1034 | Brox          | 0.657411274  |
| 2126 | Olfr1034 | Glr3          | 0.616971069  |
| 2127 | Olfr1034 | mt-Th         | 0.66178471   |
| 2128 | Olfr1034 | Ddit4         | 0.63226978   |
| 2129 | Olfr1034 | mt-Tp         | 0.662686071  |
| 2130 | Olfr1034 | mt-Ta         | 0.662686071  |
| 2131 | Olfr1034 | Mpv17         | -0.61068715  |
| 2132 | Olfr1034 | Gm6245        | -0.638394295 |
| 2133 | Olfr1034 | Cd59a         | -0.637322477 |
| 2134 | Olfr1034 | Tmem159       | -0.60103159  |
| 2135 | Olfr1034 | Acot2         | -0.662686071 |
| 2136 | Olfr1034 | Dhdh          | -0.622508261 |
| 2137 | Olfr1034 | Fam213a       | -0.643220229 |
| 2138 | Olfr1034 | Nmnat1        | -0.605873152 |
| 2139 | Olfr1034 | Coq5          | -0.662686071 |
| 2140 | Olfr1034 | Tmem184c      | -0.651508083 |
| 2141 | Olfr1034 | Nrn1          | -0.610300306 |
| 2142 | Olfr1034 | Uppt          | -0.651921824 |
| 2143 | Olfr1034 | Nsun3         | -0.662686071 |
| 2144 | Olfr1034 | Gm10718       | -0.609800071 |
| 2145 | Olfr1034 | Nr4a1         | -0.662686071 |
| 2146 | Olfr1034 | Egr1          | -0.662686071 |
| 2147 | Olfr1034 | Fos           | -0.662686071 |
| 2148 | Olfr1034 | G530011O06Rik | -0.662686071 |
| 2149 | Olfr1034 | Gm5346        | -0.657448885 |
| 2150 | Olfr1034 | Gm5912        | -0.651967258 |
| 2151 | Olfr1034 | Murc          | -0.662686071 |
| 2152 | Gm21943  | LOC102640399  | 0.62432152   |
| 2153 | Gm21943  | Gm10375       | 0.616879434  |
| 2154 | Gm21943  | mt-Tf         | 0.62432152   |
| 2155 | Gm21943  | Gm23947       | 0.62432152   |
| 2156 | Gm21943  | Gm20815       | 0.624089122  |
| 2157 | Gm21943  | mt-Ts1        | 0.62432152   |
| 2158 | Gm21943  | mt-Ty         | 0.62432152   |

|      |              |              |              |
|------|--------------|--------------|--------------|
| 2159 | Gm21943      | Gm24624      | 0.601008593  |
| 2160 | Gm21943      | LOC102633726 | 0.610520962  |
| 2161 | Gm21943      | Gm20747      | 0.607448307  |
| 2162 | Gm21943      | Trdn         | 0.62432152   |
| 2163 | Gm21943      | Snora74a     | 0.62432152   |
| 2164 | Gm21943      | mt-Ts2       | 0.62432152   |
| 2165 | Gm21943      | Gm22866      | 0.62432152   |
| 2166 | Gm21943      | Rnu12        | 0.62432152   |
| 2167 | Gm21943      | Tmeff1       | 0.62432152   |
| 2168 | Gm21943      | Gm23928      | 0.602562509  |
| 2169 | Gm21943      | LOC102639563 | 0.612052689  |
| 2170 | Gm21943      | Vaultre5     | 0.62432152   |
| 2171 | Gm21943      | Inmt         | 0.62432152   |
| 2172 | Gm21943      | Fam107a      | 0.62432152   |
| 2173 | Gm21943      | mt-Tk        | 0.62432152   |
| 2174 | Gm21943      | Brox         | 0.617708927  |
| 2175 | Gm21943      | Glr3         | 0.616971069  |
| 2176 | Gm21943      | mt-Th        | 0.62432152   |
| 2177 | Gm21943      | Ddit4        | 0.62432152   |
| 2178 | Gm21943      | mt-Tp        | 0.62432152   |
| 2179 | Gm21943      | mt-Ta        | 0.62432152   |
| 2180 | Gm21943      | Mpv17        | -0.61068715  |
| 2181 | Gm21943      | Gm6245       | -0.62432152  |
| 2182 | Gm21943      | Cd59a        | -0.62432152  |
| 2183 | Gm21943      | Tmem159      | -0.60103159  |
| 2184 | Gm21943      | Acot2        | -0.62432152  |
| 2185 | Gm21943      | Dhdh         | -0.622508261 |
| 2186 | Gm21943      | Fam213a      | -0.62432152  |
| 2187 | Gm21943      | Nmnat1       | -0.605873152 |
| 2188 | Gm21943      | Coq5         | -0.62432152  |
| 2189 | Gm21943      | Tmem184c     | -0.62432152  |
| 2190 | Gm21943      | Nrn1         | -0.610300306 |
| 2191 | Gm21943      | Uprt         | -0.62432152  |
| 2192 | Gm21943      | Nsun3        | -0.62432152  |
| 2193 | Gm21943      | Gm10718      | -0.609800071 |
| 2194 | Gm21943      | Nr4a1        | -0.621845927 |
| 2195 | Gm21943      | BC023105     | -0.605373598 |
| 2196 | Gm21943      | Egr1         | -0.62432152  |
| 2197 | Gm21943      | Fos          | -0.62432152  |
| 2198 | Gm21943      | Gm5346       | -0.62432152  |
| 2199 | Gm21943      | Gm5912       | -0.62432152  |
| 2200 | Gm21943      | Murc         | -0.62432152  |
| 2201 | LOC102640399 | Gm10375      | 0.616879434  |
| 2202 | LOC102640399 | mt-Tf        | 0.653001706  |
| 2203 | LOC102640399 | Gm23947      | 0.642276287  |
| 2204 | LOC102640399 | Gm20815      | 0.624089122  |

|      |              |               |              |
|------|--------------|---------------|--------------|
| 2205 | LOC102640399 | mt-Ts1        | 0.653001706  |
| 2206 | LOC102640399 | mt-Ty         | 0.653001706  |
| 2207 | LOC102640399 | Gm24624       | 0.601008593  |
| 2208 | LOC102640399 | LOC102633726  | 0.610520962  |
| 2209 | LOC102640399 | Gm20747       | 0.607448307  |
| 2210 | LOC102640399 | Trdn          | 0.641821472  |
| 2211 | LOC102640399 | Snora74a      | 0.653001706  |
| 2212 | LOC102640399 | mt-Ts2        | 0.653001706  |
| 2213 | LOC102640399 | Gm22866       | 0.653001706  |
| 2214 | LOC102640399 | Rnu12         | 0.653001706  |
| 2215 | LOC102640399 | Tmeff1        | 0.65030418   |
| 2216 | LOC102640399 | Gm23928       | 0.602562509  |
| 2217 | LOC102640399 | LOC102639563  | 0.612052689  |
| 2218 | LOC102640399 | Vaultre5      | 0.653001706  |
| 2219 | LOC102640399 | Inmt          | 0.646471019  |
| 2220 | LOC102640399 | Fam107a       | 0.645410606  |
| 2221 | LOC102640399 | mt-Tk         | 0.653001706  |
| 2222 | LOC102640399 | Brox          | 0.653001706  |
| 2223 | LOC102640399 | Glr3          | 0.616971069  |
| 2224 | LOC102640399 | mt-Th         | 0.653001706  |
| 2225 | LOC102640399 | Ddit4         | 0.63226978   |
| 2226 | LOC102640399 | mt-Tp         | 0.653001706  |
| 2227 | LOC102640399 | mt-Ta         | 0.653001706  |
| 2228 | LOC102640399 | Mpv17         | -0.61068715  |
| 2229 | LOC102640399 | Gm6245        | -0.638394295 |
| 2230 | LOC102640399 | Cd59a         | -0.637322477 |
| 2231 | LOC102640399 | Tmem159       | -0.60103159  |
| 2232 | LOC102640399 | Acot2         | -0.653001706 |
| 2233 | LOC102640399 | Dhdh          | -0.622508261 |
| 2234 | LOC102640399 | Fam213a       | -0.643220229 |
| 2235 | LOC102640399 | Nmnat1        | -0.605873152 |
| 2236 | LOC102640399 | Coq5          | -0.653001706 |
| 2237 | LOC102640399 | Tmem184c      | -0.651508083 |
| 2238 | LOC102640399 | Nrn1          | -0.610300306 |
| 2239 | LOC102640399 | Uppt          | -0.651921824 |
| 2240 | LOC102640399 | Nsun3         | -0.653001706 |
| 2241 | LOC102640399 | Gm10718       | -0.609800071 |
| 2242 | LOC102640399 | Nr4a1         | -0.653001706 |
| 2243 | LOC102640399 | Egr1          | -0.653001706 |
| 2244 | LOC102640399 | Fos           | -0.653001706 |
| 2245 | LOC102640399 | G530011O06Rik | -0.653001706 |
| 2246 | LOC102640399 | Gm5346        | -0.653001706 |
| 2247 | LOC102640399 | Gm5912        | -0.651967258 |
| 2248 | LOC102640399 | Murc          | -0.653001706 |
| 2249 | Gm10375      | mt-Tf         | 0.616144722  |
| 2250 | Gm10375      | Gm23947       | 0.616879434  |

|      |         |               |              |
|------|---------|---------------|--------------|
| 2251 | Gm10375 | Gm20815       | 0.616879434  |
| 2252 | Gm10375 | mt-Ty         | 0.616879434  |
| 2253 | Gm10375 | LOC102633726  | 0.610520962  |
| 2254 | Gm10375 | Gm20747       | 0.607448307  |
| 2255 | Gm10375 | Trdn          | 0.616879434  |
| 2256 | Gm10375 | Ppp4r2        | 0.616879434  |
| 2257 | Gm10375 | Gm22749       | 0.616879434  |
| 2258 | Gm10375 | Inmt          | 0.616879434  |
| 2259 | Gm10375 | Fam107a       | 0.616879434  |
| 2260 | Gm10375 | Brox          | 0.616879434  |
| 2261 | Gm10375 | Ddit4         | 0.616879434  |
| 2262 | Gm10375 | Mpv17         | -0.61068715  |
| 2263 | Gm10375 | Gm6245        | -0.616879434 |
| 2264 | Gm10375 | Cd59a         | -0.616787635 |
| 2265 | Gm10375 | Tmem159       | -0.60103159  |
| 2266 | Gm10375 | Acot2         | -0.60971604  |
| 2267 | Gm10375 | Dhdh          | -0.616879434 |
| 2268 | Gm10375 | Fam213a       | -0.616879434 |
| 2269 | Gm10375 | Tmem184c      | -0.616879434 |
| 2270 | Gm10375 | Nrn1          | -0.610300306 |
| 2271 | Gm10375 | Uprt          | -0.616879434 |
| 2272 | Gm10375 | Nsun3         | -0.61180126  |
| 2273 | Gm10375 | Gm10718       | -0.609800071 |
| 2274 | Gm10375 | Egr1          | -0.616879434 |
| 2275 | Gm10375 | Fos           | -0.616879434 |
| 2276 | Gm10375 | G530011O06Rik | -0.616879434 |
| 2277 | Gm10375 | Gm5346        | -0.616879434 |
| 2278 | Gm10375 | Gm5912        | -0.608955289 |
| 2279 | Gm10375 | Murc          | -0.616879434 |
| 2280 | mt-Tf   | Gm23947       | 0.642276287  |
| 2281 | mt-Tf   | Gm20815       | 0.624089122  |
| 2282 | mt-Tf   | mt-Ts1        | 0.823514957  |
| 2283 | mt-Tf   | mt-Ty         | 0.792687001  |
| 2284 | mt-Tf   | Gm24624       | 0.601008593  |
| 2285 | mt-Tf   | LOC102633726  | 0.610520962  |
| 2286 | mt-Tf   | Gm20747       | 0.607448307  |
| 2287 | mt-Tf   | Trdn          | 0.662913558  |
| 2288 | mt-Tf   | Snora74a      | 0.716709874  |
| 2289 | mt-Tf   | mt-Ts2        | 0.822093546  |
| 2290 | mt-Tf   | Gm22866       | 0.810797753  |
| 2291 | mt-Tf   | Rnu12         | 0.714196988  |
| 2292 | mt-Tf   | Ppp4r2        | 0.630692301  |
| 2293 | mt-Tf   | Gm22749       | 0.614416992  |
| 2294 | mt-Tf   | Tmeff1        | 0.65030418   |
| 2295 | mt-Tf   | Gm23928       | 0.602562509  |
| 2296 | mt-Tf   | LOC102639563  | 0.612052689  |

|      |         |               |              |
|------|---------|---------------|--------------|
| 2297 | mt-Tf   | Vaultre5      | 0.728238836  |
| 2298 | mt-Tf   | Inmt          | 0.646471019  |
| 2299 | mt-Tf   | Fam107a       | 0.645410606  |
| 2300 | mt-Tf   | mt-Tk         | 0.720414242  |
| 2301 | mt-Tf   | Brox          | 0.657411274  |
| 2302 | mt-Tf   | Glr3          | 0.616971069  |
| 2303 | mt-Tf   | mt-Th         | 0.66178471   |
| 2304 | mt-Tf   | Ddit4         | 0.63226978   |
| 2305 | mt-Tf   | mt-Tp         | 0.667405111  |
| 2306 | mt-Tf   | mt-Ta         | 0.680121023  |
| 2307 | mt-Tf   | Mpv17         | -0.61068715  |
| 2308 | mt-Tf   | Gm6245        | -0.638394295 |
| 2309 | mt-Tf   | Cd59a         | -0.637322477 |
| 2310 | mt-Tf   | Tmem159       | -0.60103159  |
| 2311 | mt-Tf   | Acot2         | -0.679628534 |
| 2312 | mt-Tf   | Dhdh          | -0.622508261 |
| 2313 | mt-Tf   | Fam213a       | -0.643220229 |
| 2314 | mt-Tf   | Nmnat1        | -0.605873152 |
| 2315 | mt-Tf   | Coq5          | -0.677305385 |
| 2316 | mt-Tf   | Tmem184c      | -0.651508083 |
| 2317 | mt-Tf   | Nrn1          | -0.610300306 |
| 2318 | mt-Tf   | Uppt          | -0.651921824 |
| 2319 | mt-Tf   | Nsun3         | -0.673017501 |
| 2320 | mt-Tf   | Gm10718       | -0.609800071 |
| 2321 | mt-Tf   | Nr4a1         | -0.747000222 |
| 2322 | mt-Tf   | BC023105      | -0.605373598 |
| 2323 | mt-Tf   | Egr1          | -0.704399843 |
| 2324 | mt-Tf   | Fos           | -0.695614744 |
| 2325 | mt-Tf   | G530011O06Rik | -0.740456125 |
| 2326 | mt-Tf   | Gm5346        | -0.657448885 |
| 2327 | mt-Tf   | Gm5912        | -0.651967258 |
| 2328 | mt-Tf   | Murc          | -0.843977183 |
| 2329 | Gm23947 | Gm20815       | 0.624089122  |
| 2330 | Gm23947 | mt-Ts1        | 0.642276287  |
| 2331 | Gm23947 | mt-Ty         | 0.642276287  |
| 2332 | Gm23947 | Gm24624       | 0.601008593  |
| 2333 | Gm23947 | LOC102633726  | 0.610520962  |
| 2334 | Gm23947 | Gm20747       | 0.607448307  |
| 2335 | Gm23947 | Trdn          | 0.642276287  |
| 2336 | Gm23947 | Snora74a      | 0.642276287  |
| 2337 | Gm23947 | mt-Ts2        | 0.642276287  |
| 2338 | Gm23947 | Gm22866       | 0.642276287  |
| 2339 | Gm23947 | Rnu12         | 0.642276287  |
| 2340 | Gm23947 | Gm22749       | 0.634337211  |
| 2341 | Gm23947 | Gm24149       | 0.642276287  |
| 2342 | Gm23947 | Tmeff1        | 0.642276287  |



|      |         |              |              |
|------|---------|--------------|--------------|
| 2343 | Gm23947 | Gm23928      | 0.602562509  |
| 2344 | Gm23947 | LOC102639563 | 0.612052689  |
| 2345 | Gm23947 | Vaultre5     | 0.642276287  |
| 2346 | Gm23947 | Inmt         | 0.642276287  |
| 2347 | Gm23947 | Fam107a      | 0.642276287  |
| 2348 | Gm23947 | mt-Tk        | 0.642276287  |
| 2349 | Gm23947 | Glrx3        | 0.616971069  |
| 2350 | Gm23947 | mt-Th        | 0.642276287  |
| 2351 | Gm23947 | Ddit4        | 0.60558849   |
| 2352 | Gm23947 | mt-Tp        | 0.642276287  |
| 2353 | Gm23947 | mt-Ta        | 0.642276287  |
| 2354 | Gm23947 | Mpv17        | -0.61068715  |
| 2355 | Gm23947 | Gm6245       | -0.638394295 |
| 2356 | Gm23947 | Cd59a        | -0.637322477 |
| 2357 | Gm23947 | Tmem159      | -0.60103159  |
| 2358 | Gm23947 | Acot2        | -0.642276287 |
| 2359 | Gm23947 | Dhdh         | -0.622508261 |
| 2360 | Gm23947 | Fam213a      | -0.642276287 |
| 2361 | Gm23947 | Nmnat1       | -0.605873152 |
| 2362 | Gm23947 | Coq5         | -0.642276287 |
| 2363 | Gm23947 | Tmem184c     | -0.642276287 |
| 2364 | Gm23947 | Nrn1         | -0.610300306 |
| 2365 | Gm23947 | Uprt         | -0.642276287 |
| 2366 | Gm23947 | Nsun3        | -0.642276287 |
| 2367 | Gm23947 | BC023105     | -0.605373598 |
| 2368 | Gm23947 | Gm5346       | -0.642276287 |
| 2369 | Gm23947 | Murc         | -0.642276287 |
| 2370 | Gm20815 | mt-Ts1       | 0.624089122  |
| 2371 | Gm20815 | mt-Ty        | 0.624089122  |
| 2372 | Gm20815 | Gm24624      | 0.601008593  |
| 2373 | Gm20815 | LOC102633726 | 0.610520962  |
| 2374 | Gm20815 | Gm20747      | 0.607448307  |
| 2375 | Gm20815 | Trdn         | 0.624089122  |
| 2376 | Gm20815 | Snora74a     | 0.624089122  |
| 2377 | Gm20815 | mt-Ts2       | 0.624089122  |
| 2378 | Gm20815 | Gm22866      | 0.624089122  |
| 2379 | Gm20815 | Rnu12        | 0.624089122  |
| 2380 | Gm20815 | Ppp4r2       | 0.624089122  |
| 2381 | Gm20815 | Tmeff1       | 0.624089122  |
| 2382 | Gm20815 | Gm23928      | 0.602562509  |
| 2383 | Gm20815 | LOC102639563 | 0.612052689  |
| 2384 | Gm20815 | Vaultre5     | 0.624089122  |
| 2385 | Gm20815 | Inmt         | 0.624089122  |
| 2386 | Gm20815 | Fam107a      | 0.624089122  |
| 2387 | Gm20815 | mt-Tk        | 0.624089122  |
| 2388 | Gm20815 | Brox         | 0.624089122  |

|      |         |              |              |
|------|---------|--------------|--------------|
| 2389 | Gm20815 | Glrx3        | 0.616971069  |
| 2390 | Gm20815 | mt-Th        | 0.624089122  |
| 2391 | Gm20815 | Ddit4        | 0.624089122  |
| 2392 | Gm20815 | mt-Tp        | 0.624089122  |
| 2393 | Gm20815 | mt-Ta        | 0.624089122  |
| 2394 | Gm20815 | Mpv17        | -0.61068715  |
| 2395 | Gm20815 | Gm6245       | -0.624089122 |
| 2396 | Gm20815 | Cd59a        | -0.624089122 |
| 2397 | Gm20815 | Tmem159      | -0.60103159  |
| 2398 | Gm20815 | Acot2        | -0.624089122 |
| 2399 | Gm20815 | Dhdh         | -0.622508261 |
| 2400 | Gm20815 | Fam213a      | -0.624089122 |
| 2401 | Gm20815 | Nmnat1       | -0.605873152 |
| 2402 | Gm20815 | Coq5         | -0.624089122 |
| 2403 | Gm20815 | Tmem184c     | -0.624089122 |
| 2404 | Gm20815 | Nrn1         | -0.610300306 |
| 2405 | Gm20815 | Uprt         | -0.624089122 |
| 2406 | Gm20815 | Nsun3        | -0.624089122 |
| 2407 | Gm20815 | Gm10718      | -0.609800071 |
| 2408 | Gm20815 | BC023105     | -0.605373598 |
| 2409 | Gm20815 | Egr1         | -0.624089122 |
| 2410 | Gm20815 | Fos          | -0.624089122 |
| 2411 | Gm20815 | Gm5346       | -0.624089122 |
| 2412 | Gm20815 | Gm5912       | -0.624089122 |
| 2413 | Gm20815 | Murc         | -0.624089122 |
| 2414 | mt-Ts1  | mt-Ty        | 0.792687001  |
| 2415 | mt-Ts1  | Gm24624      | 0.601008593  |
| 2416 | mt-Ts1  | LOC102633726 | 0.610520962  |
| 2417 | mt-Ts1  | Gm20747      | 0.607448307  |
| 2418 | mt-Ts1  | Trdn         | 0.662913558  |
| 2419 | mt-Ts1  | Snora74a     | 0.716709874  |
| 2420 | mt-Ts1  | mt-Ts2       | 0.822093546  |
| 2421 | mt-Ts1  | Gm22866      | 0.810797753  |
| 2422 | mt-Ts1  | Rnu12        | 0.714196988  |
| 2423 | mt-Ts1  | Gm22749      | 0.610521668  |
| 2424 | mt-Ts1  | Tmeff1       | 0.65030418   |
| 2425 | mt-Ts1  | Gm23928      | 0.602562509  |
| 2426 | mt-Ts1  | LOC102639563 | 0.612052689  |
| 2427 | mt-Ts1  | Vaultc5      | 0.728238836  |
| 2428 | mt-Ts1  | Inmt         | 0.646471019  |
| 2429 | mt-Ts1  | Fam107a      | 0.645410606  |
| 2430 | mt-Ts1  | mt-Tk        | 0.720414242  |
| 2431 | mt-Ts1  | Brox         | 0.62787898   |
| 2432 | mt-Ts1  | Glrx3        | 0.616971069  |
| 2433 | mt-Ts1  | mt-Th        | 0.66178471   |
| 2434 | mt-Ts1  | Ddit4        | 0.63226978   |

|      |        |               |              |
|------|--------|---------------|--------------|
| 2435 | mt-Ts1 | mt-Tp         | 0.667405111  |
| 2436 | mt-Ts1 | mt-Ta         | 0.680121023  |
| 2437 | mt-Ts1 | Mpv17         | -0.61068715  |
| 2438 | mt-Ts1 | Gm6245        | -0.638394295 |
| 2439 | mt-Ts1 | Cd59a         | -0.637322477 |
| 2440 | mt-Ts1 | Tmem159       | -0.60103159  |
| 2441 | mt-Ts1 | Acot2         | -0.679628534 |
| 2442 | mt-Ts1 | Dhdh          | -0.622508261 |
| 2443 | mt-Ts1 | Fam213a       | -0.643220229 |
| 2444 | mt-Ts1 | Nmnat1        | -0.605873152 |
| 2445 | mt-Ts1 | Coq5          | -0.677305385 |
| 2446 | mt-Ts1 | Tmem184c      | -0.651508083 |
| 2447 | mt-Ts1 | Nrn1          | -0.610300306 |
| 2448 | mt-Ts1 | Uppt          | -0.651921824 |
| 2449 | mt-Ts1 | Nsun3         | -0.673017501 |
| 2450 | mt-Ts1 | Gm10718       | -0.609800071 |
| 2451 | mt-Ts1 | Nr4a1         | -0.742765616 |
| 2452 | mt-Ts1 | BC023105      | -0.605373598 |
| 2453 | mt-Ts1 | Egr1          | -0.60898327  |
| 2454 | mt-Ts1 | Fos           | -0.652122797 |
| 2455 | mt-Ts1 | G530011O06Rik | -0.624279924 |
| 2456 | mt-Ts1 | Gm5346        | -0.657448885 |
| 2457 | mt-Ts1 | Gm5912        | -0.651967258 |
| 2458 | mt-Ts1 | Murc          | -0.823514957 |
| 2459 | mt-Ty  | Gm24624       | 0.601008593  |
| 2460 | mt-Ty  | LOC102633726  | 0.610520962  |
| 2461 | mt-Ty  | Gm20747       | 0.607448307  |
| 2462 | mt-Ty  | Trdn          | 0.662913558  |
| 2463 | mt-Ty  | Snora74a      | 0.716709874  |
| 2464 | mt-Ty  | mt-Ts2        | 0.792687001  |
| 2465 | mt-Ty  | Gm22866       | 0.792687001  |
| 2466 | mt-Ty  | Rnu12         | 0.714196988  |
| 2467 | mt-Ty  | Ppp4r2        | 0.65687002   |
| 2468 | mt-Ty  | Gm22749       | 0.634337211  |
| 2469 | mt-Ty  | Tmeff1        | 0.65030418   |
| 2470 | mt-Ty  | Gm23928       | 0.602562509  |
| 2471 | mt-Ty  | LOC102639563  | 0.612052689  |
| 2472 | mt-Ty  | Vaultc5       | 0.728238836  |
| 2473 | mt-Ty  | Inmt          | 0.646471019  |
| 2474 | mt-Ty  | Fam107a       | 0.645410606  |
| 2475 | mt-Ty  | mt-Tk         | 0.720414242  |
| 2476 | mt-Ty  | Brox          | 0.657411274  |
| 2477 | mt-Ty  | Glr3          | 0.616971069  |
| 2478 | mt-Ty  | mt-Th         | 0.66178471   |
| 2479 | mt-Ty  | Ddit4         | 0.63226978   |
| 2480 | mt-Ty  | mt-Tp         | 0.667405111  |

|      |         |               |              |
|------|---------|---------------|--------------|
| 2481 | mt-Ty   | mt-Ta         | 0.680121023  |
| 2482 | mt-Ty   | Mpv17         | -0.61068715  |
| 2483 | mt-Ty   | Gm6245        | -0.638394295 |
| 2484 | mt-Ty   | Cd59a         | -0.637322477 |
| 2485 | mt-Ty   | Tmem159       | -0.60103159  |
| 2486 | mt-Ty   | Acot2         | -0.679628534 |
| 2487 | mt-Ty   | Dhdh          | -0.622508261 |
| 2488 | mt-Ty   | Fam213a       | -0.643220229 |
| 2489 | mt-Ty   | Nmnat1        | -0.605873152 |
| 2490 | mt-Ty   | Coq5          | -0.677305385 |
| 2491 | mt-Ty   | Tmem184c      | -0.651508083 |
| 2492 | mt-Ty   | Nrn1          | -0.610300306 |
| 2493 | mt-Ty   | Uprt          | -0.651921824 |
| 2494 | mt-Ty   | Nsun3         | -0.673017501 |
| 2495 | mt-Ty   | Gm10718       | -0.609800071 |
| 2496 | mt-Ty   | Nr4a1         | -0.747000222 |
| 2497 | mt-Ty   | BC023105      | -0.605373598 |
| 2498 | mt-Ty   | Egr1          | -0.67487865  |
| 2499 | mt-Ty   | Fos           | -0.695614744 |
| 2500 | mt-Ty   | G530011O06Rik | -0.716188592 |
| 2501 | mt-Ty   | Gm5346        | -0.657448885 |
| 2502 | mt-Ty   | Gm5912        | -0.651967258 |
| 2503 | mt-Ty   | Murc          | -0.792687001 |
| 2504 | Gm24624 | LOC102633726  | 0.601008593  |
| 2505 | Gm24624 | Gm20747       | 0.601008593  |
| 2506 | Gm24624 | Snora74a      | 0.601008593  |
| 2507 | Gm24624 | mt-Ts2        | 0.601008593  |
| 2508 | Gm24624 | Gm22866       | 0.601008593  |
| 2509 | Gm24624 | Rnu12         | 0.601008593  |
| 2510 | Gm24624 | Gm24149       | 0.601008593  |
| 2511 | Gm24624 | Tmeff1        | 0.601008593  |
| 2512 | Gm24624 | Gm23928       | 0.601008593  |
| 2513 | Gm24624 | LOC102639563  | 0.601008593  |
| 2514 | Gm24624 | Vaultc5       | 0.601008593  |
| 2515 | Gm24624 | Inmt          | 0.601008593  |
| 2516 | Gm24624 | Fam107a       | 0.601008593  |
| 2517 | Gm24624 | mt-Tk         | 0.601008593  |
| 2518 | Gm24624 | Glr3          | 0.601008593  |
| 2519 | Gm24624 | mt-Th         | 0.601008593  |
| 2520 | Gm24624 | Ddit4         | 0.601008593  |
| 2521 | Gm24624 | mt-Tp         | 0.601008593  |
| 2522 | Gm24624 | mt-Ta         | 0.601008593  |
| 2523 | Gm24624 | Mpv17         | -0.601008593 |
| 2524 | Gm24624 | Gm6245        | -0.601008593 |
| 2525 | Gm24624 | Cd59a         | -0.601008593 |
| 2526 | Gm24624 | Tmem159       | -0.601008593 |

|      |              |              |              |
|------|--------------|--------------|--------------|
| 2527 | Gm24624      | Acot2        | -0.601008593 |
| 2528 | Gm24624      | Dhdh         | -0.601008593 |
| 2529 | Gm24624      | Fam213a      | -0.601008593 |
| 2530 | Gm24624      | Nmnat1       | -0.601008593 |
| 2531 | Gm24624      | Coq5         | -0.601008593 |
| 2532 | Gm24624      | Tmem184c     | -0.601008593 |
| 2533 | Gm24624      | Nrn1         | -0.601008593 |
| 2534 | Gm24624      | Uprt         | -0.601008593 |
| 2535 | Gm24624      | Nsun3        | -0.601008593 |
| 2536 | Gm24624      | Nr4a1        | -0.601008593 |
| 2537 | Gm24624      | BC023105     | -0.601008593 |
| 2538 | Gm24624      | Egr1         | -0.601008593 |
| 2539 | Gm24624      | Fos          | -0.601008593 |
| 2540 | Gm24624      | Gm5346       | -0.601008593 |
| 2541 | Gm24624      | Murc         | -0.601008593 |
| 2542 | LOC102633726 | Gm20747      | 0.607448307  |
| 2543 | LOC102633726 | Trdn         | 0.610520962  |
| 2544 | LOC102633726 | Snora74a     | 0.610520962  |
| 2545 | LOC102633726 | mt-Ts2       | 0.610520962  |
| 2546 | LOC102633726 | Gm22866      | 0.610520962  |
| 2547 | LOC102633726 | Rnu12        | 0.610520962  |
| 2548 | LOC102633726 | Tmeff1       | 0.610520962  |
| 2549 | LOC102633726 | Gm23928      | 0.602562509  |
| 2550 | LOC102633726 | LOC102639563 | 0.610520962  |
| 2551 | LOC102633726 | Vaultc5      | 0.610520962  |
| 2552 | LOC102633726 | Inmt         | 0.610520962  |
| 2553 | LOC102633726 | Fam107a      | 0.610520962  |
| 2554 | LOC102633726 | mt-Tk        | 0.610520962  |
| 2555 | LOC102633726 | Brox         | 0.610520962  |
| 2556 | LOC102633726 | Glr3         | 0.610520962  |
| 2557 | LOC102633726 | mt-Th        | 0.610520962  |
| 2558 | LOC102633726 | Ddit4        | 0.610520962  |
| 2559 | LOC102633726 | mt-Tp        | 0.610520962  |
| 2560 | LOC102633726 | mt-Ta        | 0.610520962  |
| 2561 | LOC102633726 | Mpv17        | -0.610520962 |
| 2562 | LOC102633726 | Gm6245       | -0.610520962 |
| 2563 | LOC102633726 | Cd59a        | -0.610520962 |
| 2564 | LOC102633726 | Tmem159      | -0.60103159  |
| 2565 | LOC102633726 | Acot2        | -0.610520962 |
| 2566 | LOC102633726 | Dhdh         | -0.610520962 |
| 2567 | LOC102633726 | Fam213a      | -0.610520962 |
| 2568 | LOC102633726 | Nmnat1       | -0.605873152 |
| 2569 | LOC102633726 | Coq5         | -0.610520962 |
| 2570 | LOC102633726 | Tmem184c     | -0.610520962 |
| 2571 | LOC102633726 | Nrn1         | -0.610300306 |
| 2572 | LOC102633726 | Uprt         | -0.610520962 |

|      |              |               |              |
|------|--------------|---------------|--------------|
| 2573 | LOC102633726 | Nsun3         | -0.610520962 |
| 2574 | LOC102633726 | Gm10718       | -0.609800071 |
| 2575 | LOC102633726 | Nr4a1         | -0.610520962 |
| 2576 | LOC102633726 | BC023105      | -0.605373598 |
| 2577 | LOC102633726 | Egr1          | -0.610520962 |
| 2578 | LOC102633726 | Fos           | -0.610520962 |
| 2579 | LOC102633726 | G530011O06Rik | -0.610520962 |
| 2580 | LOC102633726 | Gm5346        | -0.610520962 |
| 2581 | LOC102633726 | Gm5912        | -0.610520962 |
| 2582 | LOC102633726 | Murc          | -0.610520962 |
| 2583 | Gm20747      | Trdn          | 0.607448307  |
| 2584 | Gm20747      | Snora74a      | 0.607448307  |
| 2585 | Gm20747      | mt-Ts2        | 0.607448307  |
| 2586 | Gm20747      | Gm22866       | 0.607448307  |
| 2587 | Gm20747      | Rnu12         | 0.607448307  |
| 2588 | Gm20747      | Ppp4r2        | 0.607448307  |
| 2589 | Gm20747      | Tmeff1        | 0.607448307  |
| 2590 | Gm20747      | Gm23928       | 0.602562509  |
| 2591 | Gm20747      | LOC102639563  | 0.607448307  |
| 2592 | Gm20747      | Vaultc5       | 0.607448307  |
| 2593 | Gm20747      | Inmt          | 0.607448307  |
| 2594 | Gm20747      | Fam107a       | 0.607448307  |
| 2595 | Gm20747      | mt-Tk         | 0.607448307  |
| 2596 | Gm20747      | Brox          | 0.607448307  |
| 2597 | Gm20747      | Glrx3         | 0.607448307  |
| 2598 | Gm20747      | mt-Th         | 0.607448307  |
| 2599 | Gm20747      | Ddit4         | 0.607448307  |
| 2600 | Gm20747      | mt-Tp         | 0.607448307  |
| 2601 | Gm20747      | mt-Ta         | 0.607448307  |
| 2602 | Gm20747      | Mpv17         | -0.607448307 |
| 2603 | Gm20747      | Gm6245        | -0.607448307 |
| 2604 | Gm20747      | Cd59a         | -0.607448307 |
| 2605 | Gm20747      | Tmem159       | -0.60103159  |
| 2606 | Gm20747      | Acot2         | -0.607448307 |
| 2607 | Gm20747      | Dhdh          | -0.607448307 |
| 2608 | Gm20747      | Fam213a       | -0.607448307 |
| 2609 | Gm20747      | Nmnat1        | -0.605873152 |
| 2610 | Gm20747      | Coq5          | -0.607448307 |
| 2611 | Gm20747      | Tmem184c      | -0.607448307 |
| 2612 | Gm20747      | Nrn1          | -0.607448307 |
| 2613 | Gm20747      | Uprt          | -0.607448307 |
| 2614 | Gm20747      | Nsun3         | -0.607448307 |
| 2615 | Gm20747      | Gm10718       | -0.607448307 |
| 2616 | Gm20747      | Nr4a1         | -0.607448307 |
| 2617 | Gm20747      | BC023105      | -0.605373598 |
| 2618 | Gm20747      | Egr1          | -0.607448307 |

|      |          |              |              |
|------|----------|--------------|--------------|
| 2619 | Gm20747  | Fos          | -0.607448307 |
| 2620 | Gm20747  | Gm5346       | -0.607448307 |
| 2621 | Gm20747  | Gm5912       | -0.607448307 |
| 2622 | Gm20747  | Murc         | -0.607448307 |
| 2623 | Trdn     | Snora74a     | 0.662913558  |
| 2624 | Trdn     | mt-Ts2       | 0.600342649  |
| 2625 | Trdn     | Gm22866      | 0.653174468  |
| 2626 | Trdn     | Rnu12        | 0.662913558  |
| 2627 | Trdn     | Ppp4r2       | 0.662913558  |
| 2628 | Trdn     | Gm22749      | 0.634337211  |
| 2629 | Trdn     | Tmeff1       | 0.65030418   |
| 2630 | Trdn     | Gm23928      | 0.602562509  |
| 2631 | Trdn     | Vaultre5     | 0.662913558  |
| 2632 | Trdn     | Inmt         | 0.646471019  |
| 2633 | Trdn     | mt-Tk        | 0.618371874  |
| 2634 | Trdn     | Brox         | 0.657411274  |
| 2635 | Trdn     | mt-Th        | 0.655376867  |
| 2636 | Trdn     | mt-Ta        | 0.662913558  |
| 2637 | Trdn     | Mpv17        | -0.61068715  |
| 2638 | Trdn     | Gm6245       | -0.638394295 |
| 2639 | Trdn     | Cd59a        | -0.637322477 |
| 2640 | Trdn     | Tmem159      | -0.60103159  |
| 2641 | Trdn     | Acot2        | -0.662913558 |
| 2642 | Trdn     | Dhdh         | -0.622508261 |
| 2643 | Trdn     | Fam213a      | -0.643220229 |
| 2644 | Trdn     | Coq5         | -0.662913558 |
| 2645 | Trdn     | Tmem184c     | -0.647554647 |
| 2646 | Trdn     | Nrn1         | -0.610300306 |
| 2647 | Trdn     | Uprt         | -0.651921824 |
| 2648 | Trdn     | Gm10718      | -0.609800071 |
| 2649 | Trdn     | Gm5346       | -0.657448885 |
| 2650 | Trdn     | Gm5912       | -0.651967258 |
| 2651 | Trdn     | Murc         | -0.662913558 |
| 2652 | Snora74a | mt-Ts2       | 0.716709874  |
| 2653 | Snora74a | Gm22866      | 0.716709874  |
| 2654 | Snora74a | Rnu12        | 0.714196988  |
| 2655 | Snora74a | Gm22749      | 0.634337211  |
| 2656 | Snora74a | Tmeff1       | 0.65030418   |
| 2657 | Snora74a | Gm23928      | 0.602562509  |
| 2658 | Snora74a | LOC102639563 | 0.612052689  |
| 2659 | Snora74a | Vaultre5     | 0.716709874  |
| 2660 | Snora74a | Inmt         | 0.646471019  |
| 2661 | Snora74a | Fam107a      | 0.62496117   |
| 2662 | Snora74a | mt-Tk        | 0.716709874  |
| 2663 | Snora74a | Glr3         | 0.616971069  |
| 2664 | Snora74a | mt-Th        | 0.66178471   |

|      |          |              |              |
|------|----------|--------------|--------------|
| 2665 | Snora74a | mt-Tp        | 0.667405111  |
| 2666 | Snora74a | mt-Ta        | 0.680121023  |
| 2667 | Snora74a | Mpv17        | -0.61068715  |
| 2668 | Snora74a | Gm6245       | -0.638394295 |
| 2669 | Snora74a | Cd59a        | -0.637322477 |
| 2670 | Snora74a | Tmem159      | -0.60103159  |
| 2671 | Snora74a | Acot2        | -0.679628534 |
| 2672 | Snora74a | Dhdh         | -0.622508261 |
| 2673 | Snora74a | Fam213a      | -0.643220229 |
| 2674 | Snora74a | Nmnat1       | -0.605873152 |
| 2675 | Snora74a | Coq5         | -0.677305385 |
| 2676 | Snora74a | Tmem184c     | -0.651508083 |
| 2677 | Snora74a | Nrn1         | -0.610300306 |
| 2678 | Snora74a | Uprt         | -0.651921824 |
| 2679 | Snora74a | Nsun3        | -0.673017501 |
| 2680 | Snora74a | BC023105     | -0.605373598 |
| 2681 | Snora74a | Gm5912       | -0.651967258 |
| 2682 | Snora74a | Murc         | -0.716709874 |
| 2683 | mt-Ts2   | Gm22866      | 0.810797753  |
| 2684 | mt-Ts2   | Rnu12        | 0.714196988  |
| 2685 | mt-Ts2   | Tmeff1       | 0.65030418   |
| 2686 | mt-Ts2   | Gm23928      | 0.602562509  |
| 2687 | mt-Ts2   | LOC102639563 | 0.612052689  |
| 2688 | mt-Ts2   | Vaultre5     | 0.728238836  |
| 2689 | mt-Ts2   | Inmt         | 0.646471019  |
| 2690 | mt-Ts2   | Fam107a      | 0.645410606  |
| 2691 | mt-Ts2   | mt-Tk        | 0.720414242  |
| 2692 | mt-Ts2   | Glrx3        | 0.616971069  |
| 2693 | mt-Ts2   | mt-Th        | 0.66178471   |
| 2694 | mt-Ts2   | Ddit4        | 0.63226978   |
| 2695 | mt-Ts2   | mt-Tp        | 0.667405111  |
| 2696 | mt-Ts2   | mt-Ta        | 0.680121023  |
| 2697 | mt-Ts2   | Mpv17        | -0.61068715  |
| 2698 | mt-Ts2   | Gm6245       | -0.638394295 |
| 2699 | mt-Ts2   | Cd59a        | -0.637322477 |
| 2700 | mt-Ts2   | Tmem159      | -0.60103159  |
| 2701 | mt-Ts2   | Acot2        | -0.679628534 |
| 2702 | mt-Ts2   | Dhdh         | -0.622508261 |
| 2703 | mt-Ts2   | Fam213a      | -0.643220229 |
| 2704 | mt-Ts2   | Nmnat1       | -0.605873152 |
| 2705 | mt-Ts2   | Coq5         | -0.677305385 |
| 2706 | mt-Ts2   | Tmem184c     | -0.651508083 |
| 2707 | mt-Ts2   | Nrn1         | -0.610300306 |
| 2708 | mt-Ts2   | Uprt         | -0.651921824 |
| 2709 | mt-Ts2   | Nsun3        | -0.673017501 |
| 2710 | mt-Ts2   | Gm10718      | -0.609800071 |



|      |         |               |              |
|------|---------|---------------|--------------|
| 2711 | mt-Ts2  | Nr4a1         | -0.747000222 |
| 2712 | mt-Ts2  | BC023105      | -0.605373598 |
| 2713 | mt-Ts2  | Egr1          | -0.61652364  |
| 2714 | mt-Ts2  | Fos           | -0.652720916 |
| 2715 | mt-Ts2  | G530011O06Rik | -0.606523901 |
| 2716 | mt-Ts2  | Gm5346        | -0.657448885 |
| 2717 | mt-Ts2  | Gm5912        | -0.651967258 |
| 2718 | mt-Ts2  | Murc          | -0.822093546 |
| 2719 | Gm22866 | Rnu12         | 0.714196988  |
| 2720 | Gm22866 | Gm22749       | 0.634337211  |
| 2721 | Gm22866 | Tmeff1        | 0.65030418   |
| 2722 | Gm22866 | Gm23928       | 0.602562509  |
| 2723 | Gm22866 | LOC102639563  | 0.612052689  |
| 2724 | Gm22866 | Vaultre5      | 0.728238836  |
| 2725 | Gm22866 | Inmt          | 0.646471019  |
| 2726 | Gm22866 | Fam107a       | 0.645410606  |
| 2727 | Gm22866 | mt-Tk         | 0.720414242  |
| 2728 | Gm22866 | Glx3          | 0.616971069  |
| 2729 | Gm22866 | mt-Th         | 0.66178471   |
| 2730 | Gm22866 | Ddit4         | 0.63226978   |
| 2731 | Gm22866 | mt-Tp         | 0.667405111  |
| 2732 | Gm22866 | mt-Ta         | 0.680121023  |
| 2733 | Gm22866 | Mpv17         | -0.61068715  |
| 2734 | Gm22866 | Gm6245        | -0.638394295 |
| 2735 | Gm22866 | Cd59a         | -0.637322477 |
| 2736 | Gm22866 | Tmem159       | -0.60103159  |
| 2737 | Gm22866 | Acot2         | -0.679628534 |
| 2738 | Gm22866 | Dhdh          | -0.622508261 |
| 2739 | Gm22866 | Fam213a       | -0.643220229 |
| 2740 | Gm22866 | Nmnat1        | -0.605873152 |
| 2741 | Gm22866 | Coq5          | -0.677305385 |
| 2742 | Gm22866 | Tmem184c      | -0.651508083 |
| 2743 | Gm22866 | Nrn1          | -0.610300306 |
| 2744 | Gm22866 | Uprt          | -0.651921824 |
| 2745 | Gm22866 | Nsun3         | -0.673017501 |
| 2746 | Gm22866 | Nr4a1         | -0.685927353 |
| 2747 | Gm22866 | BC023105      | -0.605373598 |
| 2748 | Gm22866 | Gm5346        | -0.657448885 |
| 2749 | Gm22866 | Gm5912        | -0.651967258 |
| 2750 | Gm22866 | Murc          | -0.810797753 |
| 2751 | Rnu12   | Gm22749       | 0.621666819  |
| 2752 | Rnu12   | Tmeff1        | 0.65030418   |
| 2753 | Rnu12   | Gm23928       | 0.602562509  |
| 2754 | Rnu12   | LOC102639563  | 0.612052689  |
| 2755 | Rnu12   | Vaultre5      | 0.714196988  |
| 2756 | Rnu12   | Inmt          | 0.646471019  |

|      |         |               |              |
|------|---------|---------------|--------------|
| 2757 | Rnu12   | Fam107a       | 0.645410606  |
| 2758 | Rnu12   | mt-Tk         | 0.714196988  |
| 2759 | Rnu12   | Brox          | 0.633692105  |
| 2760 | Rnu12   | Glrx3         | 0.616971069  |
| 2761 | Rnu12   | mt-Th         | 0.66178471   |
| 2762 | Rnu12   | Ddit4         | 0.63226978   |
| 2763 | Rnu12   | mt-Tp         | 0.667405111  |
| 2764 | Rnu12   | mt-Ta         | 0.680121023  |
| 2765 | Rnu12   | Mpv17         | -0.61068715  |
| 2766 | Rnu12   | Gm6245        | -0.638394295 |
| 2767 | Rnu12   | Cd59a         | -0.637322477 |
| 2768 | Rnu12   | Tmem159       | -0.60103159  |
| 2769 | Rnu12   | Acot2         | -0.679628534 |
| 2770 | Rnu12   | Dhdh          | -0.622508261 |
| 2771 | Rnu12   | Fam213a       | -0.643220229 |
| 2772 | Rnu12   | Nmnat1        | -0.605873152 |
| 2773 | Rnu12   | Coq5          | -0.677305385 |
| 2774 | Rnu12   | Tmem184c      | -0.651508083 |
| 2775 | Rnu12   | Nrn1          | -0.610300306 |
| 2776 | Rnu12   | Uprt          | -0.651921824 |
| 2777 | Rnu12   | Nsun3         | -0.673017501 |
| 2778 | Rnu12   | Nr4a1         | -0.714196988 |
| 2779 | Rnu12   | BC023105      | -0.605373598 |
| 2780 | Rnu12   | Egr1          | -0.608129223 |
| 2781 | Rnu12   | Fos           | -0.661717656 |
| 2782 | Rnu12   | G530011O06Rik | -0.684519954 |
| 2783 | Rnu12   | Gm5346        | -0.657448885 |
| 2784 | Rnu12   | Gm5912        | -0.651967258 |
| 2785 | Rnu12   | Murc          | -0.714196988 |
| 2786 | Ppp4r2  | Inmt          | 0.646471019  |
| 2787 | Ppp4r2  | Brox          | 0.657411274  |
| 2788 | Ppp4r2  | Mpv17         | -0.61068715  |
| 2789 | Ppp4r2  | Tmem159       | -0.60103159  |
| 2790 | Ppp4r2  | Gm10718       | -0.609800071 |
| 2791 | Ppp4r2  | Nr4a1         | -0.646217126 |
| 2792 | Ppp4r2  | Egr1          | -0.696533816 |
| 2793 | Ppp4r2  | Fos           | -0.695614744 |
| 2794 | Ppp4r2  | G530011O06Rik | -0.725777902 |
| 2795 | Ppp4r2  | Gm5346        | -0.657448885 |
| 2796 | Ppp4r2  | Gm5912        | -0.651967258 |
| 2797 | Ppp4r2  | Murc          | -0.708092287 |
| 2798 | Gm22749 | Gm24149       | 0.634337211  |
| 2799 | Gm22749 | Gm23928       | 0.602562509  |
| 2800 | Gm22749 | Vaultc5       | 0.634337211  |
| 2801 | Gm22749 | Inmt          | 0.634337211  |
| 2802 | Gm22749 | Brox          | 0.627581231  |

|      |         |              |              |
|------|---------|--------------|--------------|
| 2803 | Gm22749 | mt-Ta        | 0.634337211  |
| 2804 | Gm22749 | Mpv17        | -0.61068715  |
| 2805 | Gm22749 | Gm6245       | -0.634337211 |
| 2806 | Gm22749 | Cd59a        | -0.634337211 |
| 2807 | Gm22749 | Tmem159      | -0.60103159  |
| 2808 | Gm22749 | Acot2        | -0.634337211 |
| 2809 | Gm22749 | Dhdh         | -0.622508261 |
| 2810 | Gm22749 | Fam213a      | -0.634337211 |
| 2811 | Gm22749 | Coq5         | -0.634337211 |
| 2812 | Gm22749 | Tmem184c     | -0.634337211 |
| 2813 | Gm22749 | Nrn1         | -0.610300306 |
| 2814 | Gm22749 | Uprt         | -0.634337211 |
| 2815 | Gm22749 | Nsun3        | -0.634337211 |
| 2816 | Gm22749 | Gm5346       | -0.634337211 |
| 2817 | Gm24149 | Gm23928      | 0.602562509  |
| 2818 | Gm24149 | Fam107a      | 0.632030655  |
| 2819 | Gm24149 | Dhdh         | -0.619438228 |
| 2820 | Gm24149 | Tmem184c     | -0.651508083 |
| 2821 | Gm24149 | Nrn1         | -0.610300306 |
| 2822 | Gm24149 | Nsun3        | -0.63332989  |
| 2823 | Tmeff1  | Gm23928      | 0.602562509  |
| 2824 | Tmeff1  | LOC102639563 | 0.612052689  |
| 2825 | Tmeff1  | Vaultrc5     | 0.65030418   |
| 2826 | Tmeff1  | Inmt         | 0.646471019  |
| 2827 | Tmeff1  | Fam107a      | 0.612505914  |
| 2828 | Tmeff1  | mt-Tk        | 0.65030418   |
| 2829 | Tmeff1  | Glr3         | 0.616971069  |
| 2830 | Tmeff1  | mt-Th        | 0.65030418   |
| 2831 | Tmeff1  | Ddit4        | 0.63226978   |
| 2832 | Tmeff1  | mt-Tp        | 0.65030418   |
| 2833 | Tmeff1  | mt-Ta        | 0.65030418   |
| 2834 | Tmeff1  | Mpv17        | -0.61068715  |
| 2835 | Tmeff1  | Gm6245       | -0.638394295 |
| 2836 | Tmeff1  | Cd59a        | -0.637322477 |
| 2837 | Tmeff1  | Tmem159      | -0.60103159  |
| 2838 | Tmeff1  | Acot2        | -0.65030418  |
| 2839 | Tmeff1  | Dhdh         | -0.622508261 |
| 2840 | Tmeff1  | Fam213a      | -0.643220229 |
| 2841 | Tmeff1  | Nmnat1       | -0.605873152 |
| 2842 | Tmeff1  | Coq5         | -0.65030418  |
| 2843 | Tmeff1  | Tmem184c     | -0.65030418  |
| 2844 | Tmeff1  | Nrn1         | -0.610300306 |
| 2845 | Tmeff1  | Uprt         | -0.65030418  |
| 2846 | Tmeff1  | Nsun3        | -0.65030418  |
| 2847 | Tmeff1  | Gm10718      | -0.609800071 |
| 2848 | Tmeff1  | Nr4a1        | -0.645284069 |

|      |              |               |              |
|------|--------------|---------------|--------------|
| 2849 | Tmeff1       | BC023105      | -0.605373598 |
| 2850 | Tmeff1       | Fos           | -0.620415975 |
| 2851 | Tmeff1       | Gm5346        | -0.634603988 |
| 2852 | Tmeff1       | Gm5912        | -0.65030418  |
| 2853 | Tmeff1       | Murc          | -0.65030418  |
| 2854 | Gm23928      | LOC102639563  | 0.602562509  |
| 2855 | Gm23928      | Vaultre5      | 0.602562509  |
| 2856 | Gm23928      | Inmt          | 0.602562509  |
| 2857 | Gm23928      | Fam107a       | 0.602562509  |
| 2858 | Gm23928      | mt-Tk         | 0.602562509  |
| 2859 | Gm23928      | Brox          | 0.602562509  |
| 2860 | Gm23928      | Glrx3         | 0.602562509  |
| 2861 | Gm23928      | mt-Th         | 0.602562509  |
| 2862 | Gm23928      | Ddit4         | 0.602562509  |
| 2863 | Gm23928      | mt-Tp         | 0.602562509  |
| 2864 | Gm23928      | mt-Ta         | 0.602562509  |
| 2865 | Gm23928      | Mpv17         | -0.602562509 |
| 2866 | Gm23928      | Gm6245        | -0.602562509 |
| 2867 | Gm23928      | Cd59a         | -0.602562509 |
| 2868 | Gm23928      | Tmem159       | -0.60103159  |
| 2869 | Gm23928      | Acot2         | -0.602562509 |
| 2870 | Gm23928      | Dhdh          | -0.602562509 |
| 2871 | Gm23928      | Fam213a       | -0.602562509 |
| 2872 | Gm23928      | Nmnat1        | -0.602562509 |
| 2873 | Gm23928      | Coq5          | -0.602562509 |
| 2874 | Gm23928      | Tmem184c      | -0.602562509 |
| 2875 | Gm23928      | Nrn1          | -0.602562509 |
| 2876 | Gm23928      | Uprt          | -0.602562509 |
| 2877 | Gm23928      | Nsun3         | -0.602562509 |
| 2878 | Gm23928      | Nr4a1         | -0.602562509 |
| 2879 | Gm23928      | Egr1          | -0.602562509 |
| 2880 | Gm23928      | Fos           | -0.602562509 |
| 2881 | Gm23928      | G530011O06Rik | -0.602562509 |
| 2882 | Gm23928      | Gm5346        | -0.602562509 |
| 2883 | Gm23928      | Gm5912        | -0.602562509 |
| 2884 | Gm23928      | Murc          | -0.602562509 |
| 2885 | LOC102639563 | Vaultre5      | 0.612052689  |
| 2886 | LOC102639563 | Inmt          | 0.612052689  |
| 2887 | LOC102639563 | Fam107a       | 0.612052689  |
| 2888 | LOC102639563 | mt-Tk         | 0.612052689  |
| 2889 | LOC102639563 | Glrx3         | 0.612052689  |
| 2890 | LOC102639563 | mt-Th         | 0.612052689  |
| 2891 | LOC102639563 | Ddit4         | 0.612052689  |
| 2892 | LOC102639563 | mt-Tp         | 0.612052689  |
| 2893 | LOC102639563 | mt-Ta         | 0.612052689  |
| 2894 | LOC102639563 | Mpv17         | -0.61068715  |

|      |              |               |              |
|------|--------------|---------------|--------------|
| 2895 | LOC102639563 | Gm6245        | -0.612052689 |
| 2896 | LOC102639563 | Cd59a         | -0.612052689 |
| 2897 | LOC102639563 | Tmem159       | -0.60103159  |
| 2898 | LOC102639563 | Acot2         | -0.612052689 |
| 2899 | LOC102639563 | Dhdh          | -0.612052689 |
| 2900 | LOC102639563 | Fam213a       | -0.612052689 |
| 2901 | LOC102639563 | Nmnat1        | -0.605873152 |
| 2902 | LOC102639563 | Coq5          | -0.612052689 |
| 2903 | LOC102639563 | Tmem184c      | -0.612052689 |
| 2904 | LOC102639563 | Nrn1          | -0.610300306 |
| 2905 | LOC102639563 | Uprt          | -0.612052689 |
| 2906 | LOC102639563 | Nsun3         | -0.612052689 |
| 2907 | LOC102639563 | Gm10718       | -0.609800071 |
| 2908 | LOC102639563 | Nr4a1         | -0.612052689 |
| 2909 | LOC102639563 | BC023105      | -0.605373598 |
| 2910 | LOC102639563 | Egr1          | -0.612052689 |
| 2911 | LOC102639563 | Fos           | -0.612052689 |
| 2912 | LOC102639563 | G530011O06Rik | -0.612052689 |
| 2913 | LOC102639563 | Gm5346        | -0.612052689 |
| 2914 | LOC102639563 | Murc          | -0.612052689 |
| 2915 | Vaultre5     | Inmt          | 0.646471019  |
| 2916 | Vaultre5     | Fam107a       | 0.645410606  |
| 2917 | Vaultre5     | mt-Tk         | 0.720414242  |
| 2918 | Vaultre5     | Glrx3         | 0.616971069  |
| 2919 | Vaultre5     | mt-Th         | 0.66178471   |
| 2920 | Vaultre5     | Ddit4         | 0.63226978   |
| 2921 | Vaultre5     | mt-Tp         | 0.667405111  |
| 2922 | Vaultre5     | mt-Ta         | 0.680121023  |
| 2923 | Vaultre5     | Mpv17         | -0.61068715  |
| 2924 | Vaultre5     | Gm6245        | -0.638394295 |
| 2925 | Vaultre5     | Cd59a         | -0.637322477 |
| 2926 | Vaultre5     | Tmem159       | -0.60103159  |
| 2927 | Vaultre5     | Acot2         | -0.679628534 |
| 2928 | Vaultre5     | Dhdh          | -0.622508261 |
| 2929 | Vaultre5     | Fam213a       | -0.643220229 |
| 2930 | Vaultre5     | Nmnat1        | -0.605873152 |
| 2931 | Vaultre5     | Coq5          | -0.677305385 |
| 2932 | Vaultre5     | Tmem184c      | -0.651508083 |
| 2933 | Vaultre5     | Nrn1          | -0.610300306 |
| 2934 | Vaultre5     | Uprt          | -0.651921824 |
| 2935 | Vaultre5     | Nsun3         | -0.673017501 |
| 2936 | Vaultre5     | BC023105      | -0.605373598 |
| 2937 | Vaultre5     | Gm5346        | -0.657448885 |
| 2938 | Vaultre5     | Gm5912        | -0.651967258 |
| 2939 | Vaultre5     | Murc          | -0.728238836 |
| 2940 | Inmt         | Fam107a       | 0.645410606  |

|      |         |               |              |
|------|---------|---------------|--------------|
| 2941 | Inmt    | mt-Tk         | 0.646471019  |
| 2942 | Inmt    | Brox          | 0.646471019  |
| 2943 | Inmt    | Glrx3         | 0.616971069  |
| 2944 | Inmt    | mt-Th         | 0.646471019  |
| 2945 | Inmt    | Ddit4         | 0.63226978   |
| 2946 | Inmt    | mt-Tp         | 0.646471019  |
| 2947 | Inmt    | mt-Ta         | 0.646471019  |
| 2948 | Inmt    | Mpv17         | -0.61068715  |
| 2949 | Inmt    | Gm6245        | -0.638394295 |
| 2950 | Inmt    | Cd59a         | -0.637322477 |
| 2951 | Inmt    | Tmem159       | -0.60103159  |
| 2952 | Inmt    | Acot2         | -0.646471019 |
| 2953 | Inmt    | Dhdh          | -0.622508261 |
| 2954 | Inmt    | Fam213a       | -0.643220229 |
| 2955 | Inmt    | Nmnat1        | -0.605873152 |
| 2956 | Inmt    | Coq5          | -0.646471019 |
| 2957 | Inmt    | Tmem184c      | -0.646471019 |
| 2958 | Inmt    | Nrn1          | -0.610300306 |
| 2959 | Inmt    | Uprt          | -0.646471019 |
| 2960 | Inmt    | Nsun3         | -0.646471019 |
| 2961 | Inmt    | Nr4a1         | -0.646471019 |
| 2962 | Inmt    | BC023105      | -0.605373598 |
| 2963 | Inmt    | Egr1          | -0.604479588 |
| 2964 | Inmt    | Fos           | -0.646471019 |
| 2965 | Inmt    | G530011O06Rik | -0.646471019 |
| 2966 | Inmt    | Gm5346        | -0.646471019 |
| 2967 | Inmt    | Gm5912        | -0.646471019 |
| 2968 | Inmt    | Murc          | -0.646471019 |
| 2969 | Fam107a | mt-Tk         | 0.645410606  |
| 2970 | Fam107a | Brox          | 0.645410606  |
| 2971 | Fam107a | Glrx3         | 0.616971069  |
| 2972 | Fam107a | mt-Th         | 0.645410606  |
| 2973 | Fam107a | Ddit4         | 0.63226978   |
| 2974 | Fam107a | mt-Tp         | 0.645410606  |
| 2975 | Fam107a | mt-Ta         | 0.645410606  |
| 2976 | Fam107a | Mpv17         | -0.61068715  |
| 2977 | Fam107a | Gm6245        | -0.638394295 |
| 2978 | Fam107a | Cd59a         | -0.637322477 |
| 2979 | Fam107a | Tmem159       | -0.60103159  |
| 2980 | Fam107a | Acot2         | -0.645410606 |
| 2981 | Fam107a | Dhdh          | -0.622508261 |
| 2982 | Fam107a | Fam213a       | -0.643220229 |
| 2983 | Fam107a | Nmnat1        | -0.605873152 |
| 2984 | Fam107a | Coq5          | -0.645410606 |
| 2985 | Fam107a | Tmem184c      | -0.645410606 |
| 2986 | Fam107a | Nrn1          | -0.610300306 |

|      |         |               |              |
|------|---------|---------------|--------------|
| 2987 | Fam107a | Uprt          | -0.645410606 |
| 2988 | Fam107a | Nsun3         | -0.645410606 |
| 2989 | Fam107a | Nr4a1         | -0.645410606 |
| 2990 | Fam107a | Egr1          | -0.645410606 |
| 2991 | Fam107a | Fos           | -0.645410606 |
| 2992 | Fam107a | G530011O06Rik | -0.645410606 |
| 2993 | Fam107a | Gm5346        | -0.645410606 |
| 2994 | Fam107a | Murc          | -0.645410606 |
| 2995 | mt-Tk   | Brox          | 0.657411274  |
| 2996 | mt-Tk   | Glr3          | 0.616971069  |
| 2997 | mt-Tk   | mt-Th         | 0.66178471   |
| 2998 | mt-Tk   | Ddit4         | 0.63226978   |
| 2999 | mt-Tk   | mt-Tp         | 0.667405111  |
| 3000 | mt-Tk   | mt-Ta         | 0.680121023  |
| 3001 | mt-Tk   | Mpv17         | -0.61068715  |
| 3002 | mt-Tk   | Gm6245        | -0.638394295 |
| 3003 | mt-Tk   | Cd59a         | -0.637322477 |
| 3004 | mt-Tk   | Tmem159       | -0.60103159  |
| 3005 | mt-Tk   | Acot2         | -0.679628534 |
| 3006 | mt-Tk   | Dhdh          | -0.622508261 |
| 3007 | mt-Tk   | Fam213a       | -0.643220229 |
| 3008 | mt-Tk   | Nmnat1        | -0.605873152 |
| 3009 | mt-Tk   | Coq5          | -0.677305385 |
| 3010 | mt-Tk   | Tmem184c      | -0.651508083 |
| 3011 | mt-Tk   | Nrn1          | -0.610300306 |
| 3012 | mt-Tk   | Uprt          | -0.651921824 |
| 3013 | mt-Tk   | Nsun3         | -0.673017501 |
| 3014 | mt-Tk   | Gm10718       | -0.609800071 |
| 3015 | mt-Tk   | Nr4a1         | -0.720414242 |
| 3016 | mt-Tk   | Egr1          | -0.704399843 |
| 3017 | mt-Tk   | Fos           | -0.695614744 |
| 3018 | mt-Tk   | G530011O06Rik | -0.720414242 |
| 3019 | mt-Tk   | Gm5346        | -0.657448885 |
| 3020 | mt-Tk   | Gm5912        | -0.651967258 |
| 3021 | mt-Tk   | Murc          | -0.720414242 |
| 3022 | Brox    | Glr3          | 0.616971069  |
| 3023 | Brox    | mt-Th         | 0.648440869  |
| 3024 | Brox    | Ddit4         | 0.63226978   |
| 3025 | Brox    | mt-Tp         | 0.605450373  |
| 3026 | Brox    | mt-Ta         | 0.657411274  |
| 3027 | Brox    | Mpv17         | -0.61068715  |
| 3028 | Brox    | Gm6245        | -0.638394295 |
| 3029 | Brox    | Tmem159       | -0.60103159  |
| 3030 | Brox    | Dhdh          | -0.622508261 |
| 3031 | Brox    | Fam213a       | -0.643220229 |
| 3032 | Brox    | Coq5          | -0.626735973 |

|      |       |               |              |
|------|-------|---------------|--------------|
| 3033 | Brox  | Tmem184c      | -0.641514331 |
| 3034 | Brox  | Nrn1          | -0.610300306 |
| 3035 | Brox  | Uprt          | -0.651921824 |
| 3036 | Brox  | Gm10718       | -0.609800071 |
| 3037 | Brox  | Nr4a1         | -0.657411274 |
| 3038 | Brox  | Egr1          | -0.657411274 |
| 3039 | Brox  | Fos           | -0.657411274 |
| 3040 | Brox  | G530011O06Rik | -0.657411274 |
| 3041 | Brox  | Gm5346        | -0.657411274 |
| 3042 | Brox  | Gm5912        | -0.651967258 |
| 3043 | Brox  | Murc          | -0.657411274 |
| 3044 | Glx3  | mt-Th         | 0.616971069  |
| 3045 | Glx3  | Ddit4         | 0.616971069  |
| 3046 | Glx3  | mt-Tp         | 0.616971069  |
| 3047 | Glx3  | mt-Ta         | 0.616971069  |
| 3048 | Glx3  | Mpv17         | -0.61068715  |
| 3049 | Glx3  | Gm6245        | -0.616971069 |
| 3050 | Glx3  | Cd59a         | -0.616971069 |
| 3051 | Glx3  | Tmem159       | -0.60103159  |
| 3052 | Glx3  | Acot2         | -0.616971069 |
| 3053 | Glx3  | Dhdh          | -0.616971069 |
| 3054 | Glx3  | Fam213a       | -0.616971069 |
| 3055 | Glx3  | Nmnat1        | -0.605873152 |
| 3056 | Glx3  | Coq5          | -0.616971069 |
| 3057 | Glx3  | Tmem184c      | -0.616971069 |
| 3058 | Glx3  | Nrn1          | -0.610300306 |
| 3059 | Glx3  | Uprt          | -0.616971069 |
| 3060 | Glx3  | Nsun3         | -0.616971069 |
| 3061 | Glx3  | Gm10718       | -0.609800071 |
| 3062 | Glx3  | Nr4a1         | -0.616971069 |
| 3063 | Glx3  | Egr1          | -0.616971069 |
| 3064 | Glx3  | Fos           | -0.616971069 |
| 3065 | Glx3  | G530011O06Rik | -0.616971069 |
| 3066 | Glx3  | Gm5346        | -0.616971069 |
| 3067 | Glx3  | Gm5912        | -0.616971069 |
| 3068 | Glx3  | Murc          | -0.616971069 |
| 3069 | mt-Th | Ddit4         | 0.63226978   |
| 3070 | mt-Th | mt-Tp         | 0.66178471   |
| 3071 | mt-Th | mt-Ta         | 0.66178471   |
| 3072 | mt-Th | Mpv17         | -0.61068715  |
| 3073 | mt-Th | Gm6245        | -0.638394295 |
| 3074 | mt-Th | Cd59a         | -0.637322477 |
| 3075 | mt-Th | Tmem159       | -0.60103159  |
| 3076 | mt-Th | Acot2         | -0.66178471  |
| 3077 | mt-Th | Dhdh          | -0.622508261 |
| 3078 | mt-Th | Fam213a       | -0.643220229 |



|      |       |               |              |
|------|-------|---------------|--------------|
| 3079 | mt-Th | Nmnat1        | -0.605873152 |
| 3080 | mt-Th | Coq5          | -0.66178471  |
| 3081 | mt-Th | Tmem184c      | -0.651508083 |
| 3082 | mt-Th | Nrn1          | -0.610300306 |
| 3083 | mt-Th | Uppt          | -0.651921824 |
| 3084 | mt-Th | Nsun3         | -0.66178471  |
| 3085 | mt-Th | Gm10718       | -0.609800071 |
| 3086 | mt-Th | Nr4a1         | -0.66178471  |
| 3087 | mt-Th | BC023105      | -0.605373598 |
| 3088 | mt-Th | Egr1          | -0.66178471  |
| 3089 | mt-Th | Fos           | -0.66178471  |
| 3090 | mt-Th | G530011O06Rik | -0.66178471  |
| 3091 | mt-Th | Gm5346        | -0.657448885 |
| 3092 | mt-Th | Gm5912        | -0.651967258 |
| 3093 | mt-Th | Murc          | -0.66178471  |
| 3094 | Ddit4 | mt-Tp         | 0.63226978   |
| 3095 | Ddit4 | mt-Ta         | 0.63226978   |
| 3096 | Ddit4 | Mpv17         | -0.61068715  |
| 3097 | Ddit4 | Gm6245        | -0.63226978  |
| 3098 | Ddit4 | Cd59a         | -0.63226978  |
| 3099 | Ddit4 | Tmem159       | -0.60103159  |
| 3100 | Ddit4 | Acot2         | -0.63226978  |
| 3101 | Ddit4 | Dhdh          | -0.622508261 |
| 3102 | Ddit4 | Fam213a       | -0.63226978  |
| 3103 | Ddit4 | Nmnat1        | -0.605873152 |
| 3104 | Ddit4 | Coq5          | -0.63226978  |
| 3105 | Ddit4 | Tmem184c      | -0.63226978  |
| 3106 | Ddit4 | Nrn1          | -0.610300306 |
| 3107 | Ddit4 | Uppt          | -0.63226978  |
| 3108 | Ddit4 | Nsun3         | -0.63226978  |
| 3109 | Ddit4 | Gm10718       | -0.609800071 |
| 3110 | Ddit4 | Nr4a1         | -0.63226978  |
| 3111 | Ddit4 | Egr1          | -0.63226978  |
| 3112 | Ddit4 | Fos           | -0.63226978  |
| 3113 | Ddit4 | G530011O06Rik | -0.63226978  |
| 3114 | Ddit4 | Gm5346        | -0.63226978  |
| 3115 | Ddit4 | Murc          | -0.63226978  |
| 3116 | mt-Tp | mt-Ta         | 0.667405111  |
| 3117 | mt-Tp | Mpv17         | -0.61068715  |
| 3118 | mt-Tp | Gm6245        | -0.638394295 |
| 3119 | mt-Tp | Cd59a         | -0.637322477 |
| 3120 | mt-Tp | Tmem159       | -0.60103159  |
| 3121 | mt-Tp | Acot2         | -0.667405111 |
| 3122 | mt-Tp | Dhdh          | -0.622508261 |
| 3123 | mt-Tp | Fam213a       | -0.643220229 |
| 3124 | mt-Tp | Nmnat1        | -0.605873152 |

|      |       |               |              |
|------|-------|---------------|--------------|
| 3125 | mt-Tp | Coq5          | -0.667405111 |
| 3126 | mt-Tp | Tmem184c      | -0.651508083 |
| 3127 | mt-Tp | Nrn1          | -0.610300306 |
| 3128 | mt-Tp | Uprt          | -0.651921824 |
| 3129 | mt-Tp | Nsun3         | -0.667405111 |
| 3130 | mt-Tp | Gm10718       | -0.609800071 |
| 3131 | mt-Tp | Nr4a1         | -0.667405111 |
| 3132 | mt-Tp | BC023105      | -0.605373598 |
| 3133 | mt-Tp | Egr1          | -0.667405111 |
| 3134 | mt-Tp | Fos           | -0.667405111 |
| 3135 | mt-Tp | G530011O06Rik | -0.667405111 |
| 3136 | mt-Tp | Gm5346        | -0.657448885 |
| 3137 | mt-Tp | Gm5912        | -0.651967258 |
| 3138 | mt-Tp | Murc          | -0.667405111 |
| 3139 | mt-Ta | Mpv17         | -0.61068715  |
| 3140 | mt-Ta | Gm6245        | -0.638394295 |
| 3141 | mt-Ta | Cd59a         | -0.637322477 |
| 3142 | mt-Ta | Tmem159       | -0.60103159  |
| 3143 | mt-Ta | Acot2         | -0.679628534 |
| 3144 | mt-Ta | Dhdh          | -0.622508261 |
| 3145 | mt-Ta | Fam213a       | -0.643220229 |
| 3146 | mt-Ta | Nmnat1        | -0.605873152 |
| 3147 | mt-Ta | Coq5          | -0.677305385 |
| 3148 | mt-Ta | Tmem184c      | -0.651508083 |
| 3149 | mt-Ta | Nrn1          | -0.610300306 |
| 3150 | mt-Ta | Uprt          | -0.651921824 |
| 3151 | mt-Ta | Nsun3         | -0.673017501 |
| 3152 | mt-Ta | Nr4a1         | -0.680121023 |
| 3153 | mt-Ta | BC023105      | -0.605373598 |
| 3154 | mt-Ta | Egr1          | -0.640973115 |
| 3155 | mt-Ta | Fos           | -0.680121023 |
| 3156 | mt-Ta | G530011O06Rik | -0.680121023 |
| 3157 | mt-Ta | Gm5346        | -0.657448885 |
| 3158 | mt-Ta | Gm5912        | -0.651967258 |
| 3159 | mt-Ta | Murc          | -0.680121023 |
| 3160 | Mpv17 | Gm6245        | 0.61068715   |
| 3161 | Mpv17 | Cd59a         | 0.61068715   |
| 3162 | Mpv17 | Tmem159       | 0.60103159   |
| 3163 | Mpv17 | Acot2         | 0.61068715   |
| 3164 | Mpv17 | Dhdh          | 0.61068715   |
| 3165 | Mpv17 | Fam213a       | 0.61068715   |
| 3166 | Mpv17 | Nmnat1        | 0.605873152  |
| 3167 | Mpv17 | Coq5          | 0.61068715   |
| 3168 | Mpv17 | Tmem184c      | 0.61068715   |
| 3169 | Mpv17 | Nrn1          | 0.610300306  |
| 3170 | Mpv17 | Uprt          | 0.61068715   |

|      |         |               |             |
|------|---------|---------------|-------------|
| 3171 | Mpv17   | Nsun3         | 0.61068715  |
| 3172 | Mpv17   | Gm10718       | 0.609800071 |
| 3173 | Mpv17   | Nr4a1         | 0.61068715  |
| 3174 | Mpv17   | BC023105      | 0.605373598 |
| 3175 | Mpv17   | Egr1          | 0.61068715  |
| 3176 | Mpv17   | Fos           | 0.61068715  |
| 3177 | Mpv17   | G530011O06Rik | 0.61068715  |
| 3178 | Mpv17   | Gm5346        | 0.61068715  |
| 3179 | Mpv17   | Gm5912        | 0.61068715  |
| 3180 | Mpv17   | Murc          | 0.61068715  |
| 3181 | Gm6245  | Cd59a         | 0.637322477 |
| 3182 | Gm6245  | Tmem159       | 0.60103159  |
| 3183 | Gm6245  | Acot2         | 0.638394295 |
| 3184 | Gm6245  | Dhdh          | 0.622508261 |
| 3185 | Gm6245  | Fam213a       | 0.638394295 |
| 3186 | Gm6245  | Nmnat1        | 0.605873152 |
| 3187 | Gm6245  | Coq5          | 0.638394295 |
| 3188 | Gm6245  | Tmem184c      | 0.638394295 |
| 3189 | Gm6245  | Nrn1          | 0.610300306 |
| 3190 | Gm6245  | Uprt          | 0.638394295 |
| 3191 | Gm6245  | Nsun3         | 0.638394295 |
| 3192 | Gm6245  | Gm10718       | 0.609800071 |
| 3193 | Gm6245  | Nr4a1         | 0.638394295 |
| 3194 | Gm6245  | BC023105      | 0.605373598 |
| 3195 | Gm6245  | Egr1          | 0.62827716  |
| 3196 | Gm6245  | Fos           | 0.638394295 |
| 3197 | Gm6245  | G530011O06Rik | 0.621019387 |
| 3198 | Gm6245  | Gm5346        | 0.638394295 |
| 3199 | Gm6245  | Gm5912        | 0.638394295 |
| 3200 | Gm6245  | Murc          | 0.638394295 |
| 3201 | Cd59a   | Tmem159       | 0.60103159  |
| 3202 | Cd59a   | Acot2         | 0.637322477 |
| 3203 | Cd59a   | Dhdh          | 0.622508261 |
| 3204 | Cd59a   | Fam213a       | 0.637322477 |
| 3205 | Cd59a   | Nmnat1        | 0.605873152 |
| 3206 | Cd59a   | Coq5          | 0.637322477 |
| 3207 | Cd59a   | Tmem184c      | 0.637322477 |
| 3208 | Cd59a   | Nrn1          | 0.610300306 |
| 3209 | Cd59a   | Uprt          | 0.637322477 |
| 3210 | Cd59a   | Nsun3         | 0.637322477 |
| 3211 | Cd59a   | BC023105      | 0.605373598 |
| 3212 | Cd59a   | Gm5346        | 0.637322477 |
| 3213 | Cd59a   | Gm5912        | 0.637322477 |
| 3214 | Cd59a   | Murc          | 0.637322477 |
| 3215 | Tmem159 | Acot2         | 0.60103159  |
| 3216 | Tmem159 | Dhdh          | 0.60103159  |

|      |         |               |             |
|------|---------|---------------|-------------|
| 3217 | Tmem159 | Fam213a       | 0.60103159  |
| 3218 | Tmem159 | Nmnat1        | 0.60103159  |
| 3219 | Tmem159 | Coq5          | 0.60103159  |
| 3220 | Tmem159 | Tmem184c      | 0.60103159  |
| 3221 | Tmem159 | Nrn1          | 0.60103159  |
| 3222 | Tmem159 | Uprt          | 0.60103159  |
| 3223 | Tmem159 | Nsun3         | 0.60103159  |
| 3224 | Tmem159 | Gm10718       | 0.60103159  |
| 3225 | Tmem159 | Nr4a1         | 0.60103159  |
| 3226 | Tmem159 | Egr1          | 0.60103159  |
| 3227 | Tmem159 | Fos           | 0.60103159  |
| 3228 | Tmem159 | G530011O06Rik | 0.60103159  |
| 3229 | Tmem159 | Gm5346        | 0.60103159  |
| 3230 | Tmem159 | Gm5912        | 0.60103159  |
| 3231 | Tmem159 | Murc          | 0.60103159  |
| 3232 | Acot2   | Dhdh          | 0.622508261 |
| 3233 | Acot2   | Fam213a       | 0.643220229 |
| 3234 | Acot2   | Nmnat1        | 0.605873152 |
| 3235 | Acot2   | Coq5          | 0.677305385 |
| 3236 | Acot2   | Tmem184c      | 0.651508083 |
| 3237 | Acot2   | Nrn1          | 0.610300306 |
| 3238 | Acot2   | Uprt          | 0.651921824 |
| 3239 | Acot2   | Nsun3         | 0.673017501 |
| 3240 | Acot2   | BC023105      | 0.605373598 |
| 3241 | Acot2   | Gm5346        | 0.657448885 |
| 3242 | Acot2   | Gm5912        | 0.651967258 |
| 3243 | Acot2   | Murc          | 0.679628534 |
| 3244 | Dhdh    | Fam213a       | 0.622508261 |
| 3245 | Dhdh    | Nmnat1        | 0.605873152 |
| 3246 | Dhdh    | Coq5          | 0.622508261 |
| 3247 | Dhdh    | Tmem184c      | 0.622508261 |
| 3248 | Dhdh    | Nrn1          | 0.610300306 |
| 3249 | Dhdh    | Uprt          | 0.622508261 |
| 3250 | Dhdh    | Nsun3         | 0.622508261 |
| 3251 | Dhdh    | Nr4a1         | 0.622508261 |
| 3252 | Dhdh    | BC023105      | 0.605373598 |
| 3253 | Dhdh    | Egr1          | 0.622508261 |
| 3254 | Dhdh    | Fos           | 0.622508261 |
| 3255 | Dhdh    | G530011O06Rik | 0.622508261 |
| 3256 | Dhdh    | Gm5346        | 0.622508261 |
| 3257 | Dhdh    | Gm5912        | 0.622508261 |
| 3258 | Dhdh    | Murc          | 0.622508261 |
| 3259 | Fam213a | Nmnat1        | 0.605873152 |
| 3260 | Fam213a | Coq5          | 0.643220229 |
| 3261 | Fam213a | Tmem184c      | 0.643220229 |
| 3262 | Fam213a | Nrn1          | 0.610300306 |

|      |          |               |             |
|------|----------|---------------|-------------|
| 3263 | Fam213a  | Uprt          | 0.643220229 |
| 3264 | Fam213a  | Nsun3         | 0.643220229 |
| 3265 | Fam213a  | Gm10718       | 0.609800071 |
| 3266 | Fam213a  | Nr4a1         | 0.643220229 |
| 3267 | Fam213a  | BC023105      | 0.605373598 |
| 3268 | Fam213a  | Egr1          | 0.643220229 |
| 3269 | Fam213a  | Fos           | 0.643220229 |
| 3270 | Fam213a  | G530011O06Rik | 0.643220229 |
| 3271 | Fam213a  | Gm5346        | 0.643220229 |
| 3272 | Fam213a  | Gm5912        | 0.643220229 |
| 3273 | Fam213a  | Murc          | 0.643220229 |
| 3274 | Nmnat1   | Coq5          | 0.605873152 |
| 3275 | Nmnat1   | Tmem184c      | 0.605873152 |
| 3276 | Nmnat1   | Nrn1          | 0.605873152 |
| 3277 | Nmnat1   | Uprt          | 0.605873152 |
| 3278 | Nmnat1   | Nsun3         | 0.605873152 |
| 3279 | Nmnat1   | Nr4a1         | 0.605873152 |
| 3280 | Nmnat1   | BC023105      | 0.605373598 |
| 3281 | Nmnat1   | Gm5346        | 0.605873152 |
| 3282 | Nmnat1   | Gm5912        | 0.605873152 |
| 3283 | Nmnat1   | Murc          | 0.605873152 |
| 3284 | Coq5     | Tmem184c      | 0.651508083 |
| 3285 | Coq5     | Nrn1          | 0.610300306 |
| 3286 | Coq5     | Uprt          | 0.651921824 |
| 3287 | Coq5     | Nsun3         | 0.673017501 |
| 3288 | Coq5     | Gm10718       | 0.602732694 |
| 3289 | Coq5     | Nr4a1         | 0.677305385 |
| 3290 | Coq5     | BC023105      | 0.605373598 |
| 3291 | Coq5     | Fos           | 0.628958607 |
| 3292 | Coq5     | G530011O06Rik | 0.616075739 |
| 3293 | Coq5     | Gm5346        | 0.657448885 |
| 3294 | Coq5     | Gm5912        | 0.651967258 |
| 3295 | Coq5     | Murc          | 0.677305385 |
| 3296 | Tmem184c | Nrn1          | 0.610300306 |
| 3297 | Tmem184c | Uprt          | 0.651508083 |
| 3298 | Tmem184c | Nsun3         | 0.651508083 |
| 3299 | Tmem184c | Nr4a1         | 0.607968651 |
| 3300 | Tmem184c | BC023105      | 0.605373598 |
| 3301 | Tmem184c | G530011O06Rik | 0.639262445 |
| 3302 | Tmem184c | Gm5346        | 0.651508083 |
| 3303 | Tmem184c | Murc          | 0.651508083 |
| 3304 | Nrn1     | Uprt          | 0.610300306 |
| 3305 | Nrn1     | Nsun3         | 0.610300306 |
| 3306 | Nrn1     | Nr4a1         | 0.60682593  |
| 3307 | Nrn1     | BC023105      | 0.605373598 |
| 3308 | Nrn1     | Gm5346        | 0.610300306 |

|      |               |               |             |
|------|---------------|---------------|-------------|
| 3309 | Nrn1          | Gm5912        | 0.610300306 |
| 3310 | Nrn1          | Murc          | 0.610300306 |
| 3311 | Uprt          | Nsun3         | 0.651921824 |
| 3312 | Uprt          | Gm10718       | 0.609800071 |
| 3313 | Uprt          | Nr4a1         | 0.651921824 |
| 3314 | Uprt          | BC023105      | 0.605373598 |
| 3315 | Uprt          | Egr1          | 0.651921824 |
| 3316 | Uprt          | Fos           | 0.651921824 |
| 3317 | Uprt          | G530011O06Rik | 0.62605167  |
| 3318 | Uprt          | Gm5346        | 0.651921824 |
| 3319 | Uprt          | Gm5912        | 0.651921824 |
| 3320 | Uprt          | Murc          | 0.651921824 |
| 3321 | Nsun3         | BC023105      | 0.605373598 |
| 3322 | Nsun3         | Gm5346        | 0.657448885 |
| 3323 | Nsun3         | Murc          | 0.673017501 |
| 3324 | Gm10718       | Nr4a1         | 0.609800071 |
| 3325 | Gm10718       | Egr1          | 0.609800071 |
| 3326 | Gm10718       | Fos           | 0.609800071 |
| 3327 | Gm10718       | Gm5346        | 0.609800071 |
| 3328 | Gm10718       | Gm5912        | 0.609800071 |
| 3329 | Gm10718       | Murc          | 0.609800071 |
| 3330 | Nr4a1         | Egr1          | 0.704399843 |
| 3331 | Nr4a1         | Fos           | 0.695614744 |
| 3332 | Nr4a1         | G530011O06Rik | 0.740456125 |
| 3333 | Nr4a1         | Gm5346        | 0.657448885 |
| 3334 | Nr4a1         | Gm5912        | 0.638183711 |
| 3335 | Nr4a1         | Murc          | 0.747000222 |
| 3336 | BC023105      | Gm5912        | 0.605373598 |
| 3337 | Egr1          | Fos           | 0.695614744 |
| 3338 | Egr1          | G530011O06Rik | 0.704399843 |
| 3339 | Egr1          | Gm5346        | 0.657448885 |
| 3340 | Egr1          | Murc          | 0.704399843 |
| 3341 | Fos           | G530011O06Rik | 0.695614744 |
| 3342 | Fos           | Gm5346        | 0.657448885 |
| 3343 | Fos           | Murc          | 0.695614744 |
| 3344 | G530011O06Rik | Gm5346        | 0.657448885 |
| 3345 | G530011O06Rik | Murc          | 0.722746106 |
| 3346 | Gm5346        | Gm5912        | 0.651967258 |
| 3347 | Gm5346        | Murc          | 0.657448885 |
| 3348 | Gm5912        | Murc          | 0.651967258 |

**Table S4. Benjamini corrected P-values of the enrichment pathways in Figure 1B.**

| Term                                         | P-value    |
|----------------------------------------------|------------|
| Gamete generation                            | 1.40E-04   |
| Skeletal muscle cell differentiation         | 0.0042497  |
| Methyltransferase activity                   | 0.02957848 |
| Methylation                                  | 0.03585928 |
| Regulation of the force of heart contraction | 0.03994466 |
| Cellular response to reactive oxygen species | 0.04164585 |
| Response to hypoxia                          | 0.04517363 |
| Protein heterodimerization activity          | 0.04829376 |
| Cellular response to organic substance       | 0.05682571 |
| Reactive oxygen species metabolic process    | 0.06515804 |

P=0.05 is a significance threshold.

**Table S5. Benjamini corrected P-values of the enrichment pathways in Figure 4C.**

| Term                                         | P-value  |
|----------------------------------------------|----------|
| Regulation of the force of heart contraction | 0.002678 |
| Response to reactive oxygen species          | 0.003656 |
| Regulation of apoptosis                      | 0.008735 |
| Response to hypoxia                          | 0.017106 |

P=0.05 is a significance threshold.



**Figure S1. Microarray analysis of the heart of WT and MURC KO mice.**

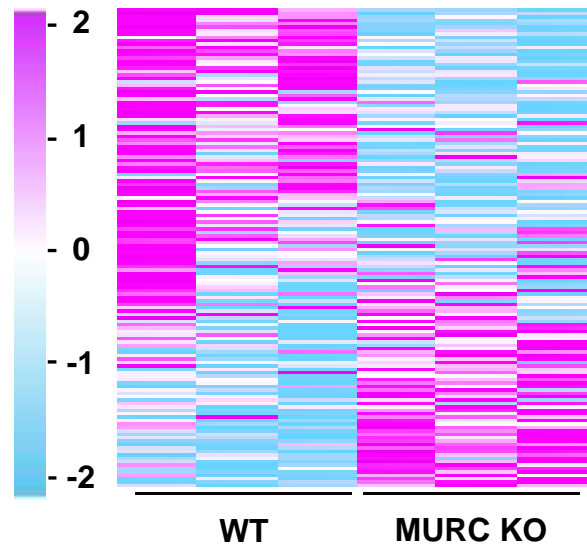

Heat map for entire genes. Magenta color indicates upregulated gene, while cyan color indicates down-regulated gene. Gene expression is scaled by  $\log_{10}$ .

**Figure S2. Heart rate of WT and MURC KO mouse heart during echocardiography after sham operation or 24 h after I/R. n = 10 per group.**

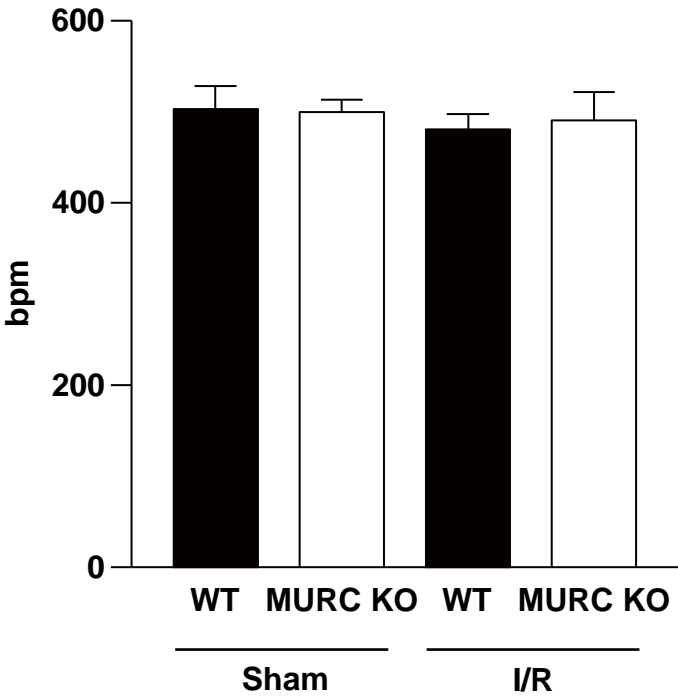

Data are presented as mean  $\pm$  SEM.

**A**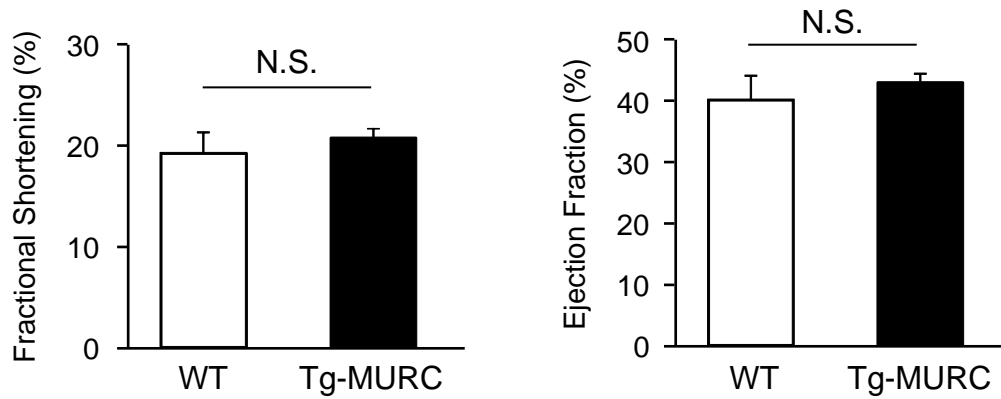**B**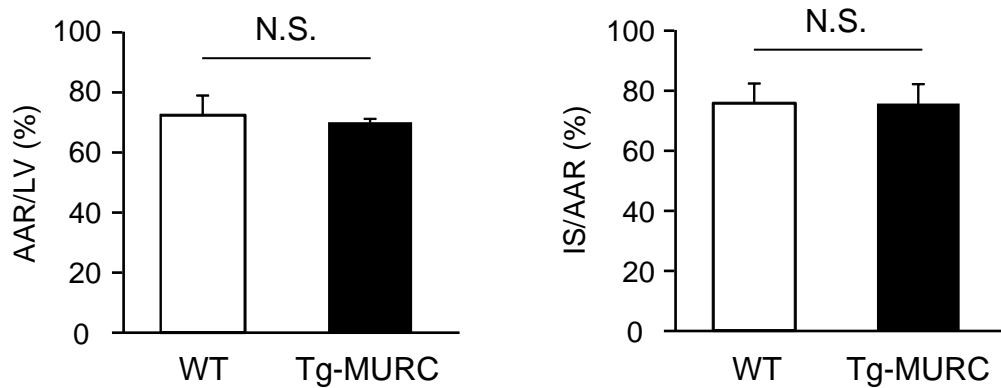**C**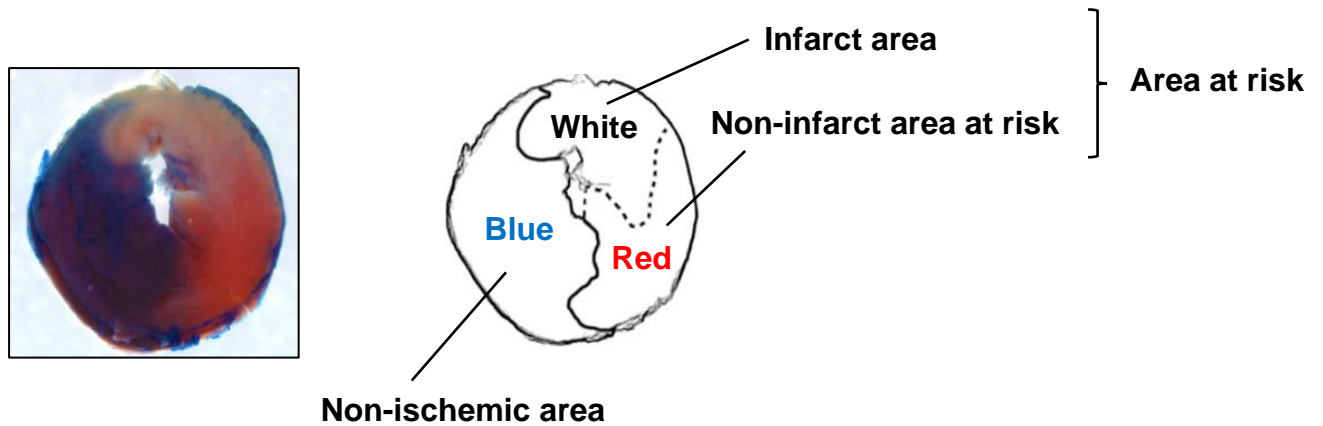

**Figure S3. Effect of cardiospecific MURC overexpression in I/R injury.** (A) LV systolic function of Tg-MURC mouse hearts 24 h after I/R.  $n = 5$  per group. (B) Infarct size as measured by TTC and Evans blue staining of LV tissue from Tg-MURC mouse hearts 24 h after I/R. (C) Representative photo (left) and its illustration (right) of TTC and Evans blue staining. Blue, white and red regions represent the non-ischemic area, the infarct area and the non-infarct area at risk respectively. The area at risk consists of the infarct area and the non-infarct area at risk. Data are presented as mean  $\pm$  SEM.  $n = 3$  per group. N.S. indicates not significant ( $P \geq 0.05$ ). I/R, ischemia/reperfusion; LV, left ventricle; AAR, area at risk; IS, infarct size; TTC, triphenyltetrazolium chloride.

**A**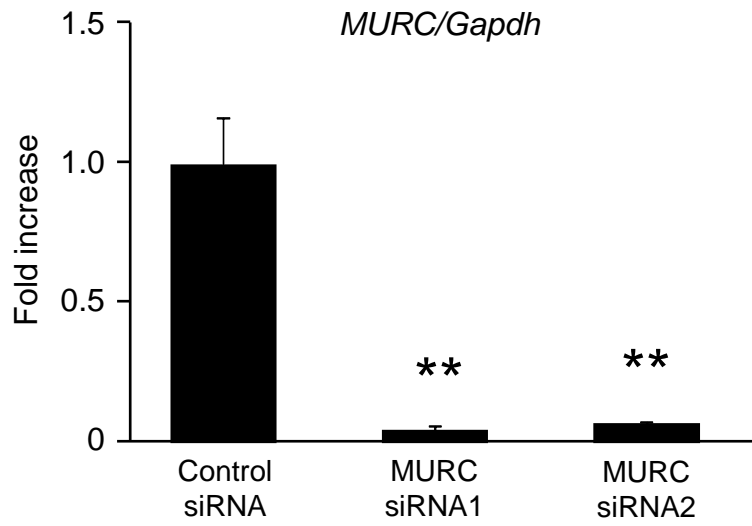**B**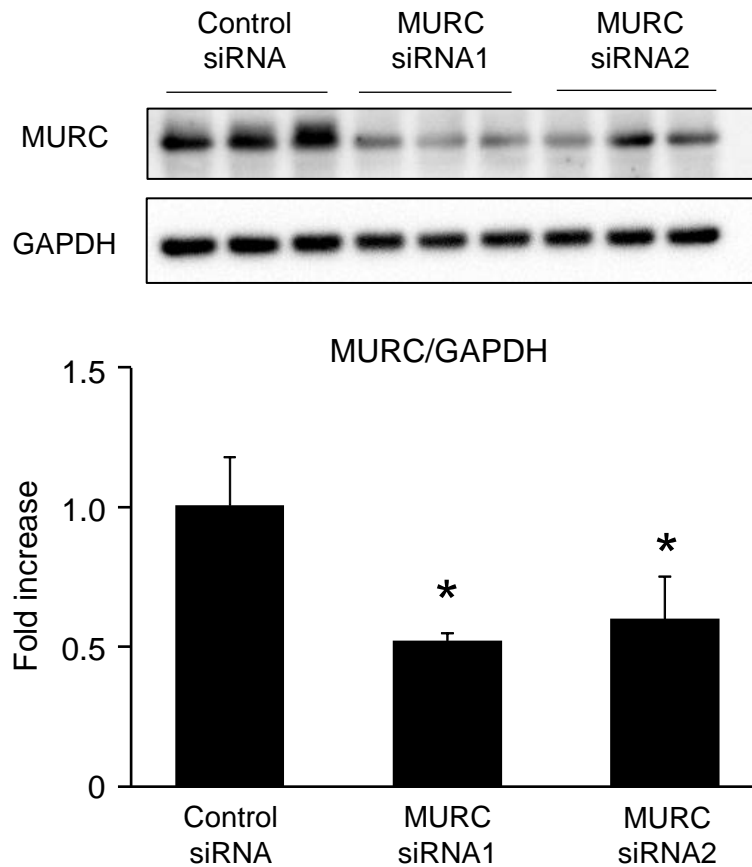

**Figure S4. Gene silencing of MURC through siRNA in neonatal rat cardiomyocytes.** (A) mRNA expression of MURC in neonatal rat cardiomyocytes 48 h after transfection with control siRNA, MURC siRNA1 and siRNA2. (B) Representative Western blots (upper) and its quantification (lower) of MURC in neonatal rat cardiomyocytes 72 h after transfection with control siRNA, MURC siRNA1 and siRNA2. Data are presented as mean  $\pm$  SEM. \* $P < 0.05$ , \*\* $P < 0.01$  compared with control siRNA.  $n = 3$  per group. Gapdh, Glyceraldehyde-3-phosphate dehydrogenase.

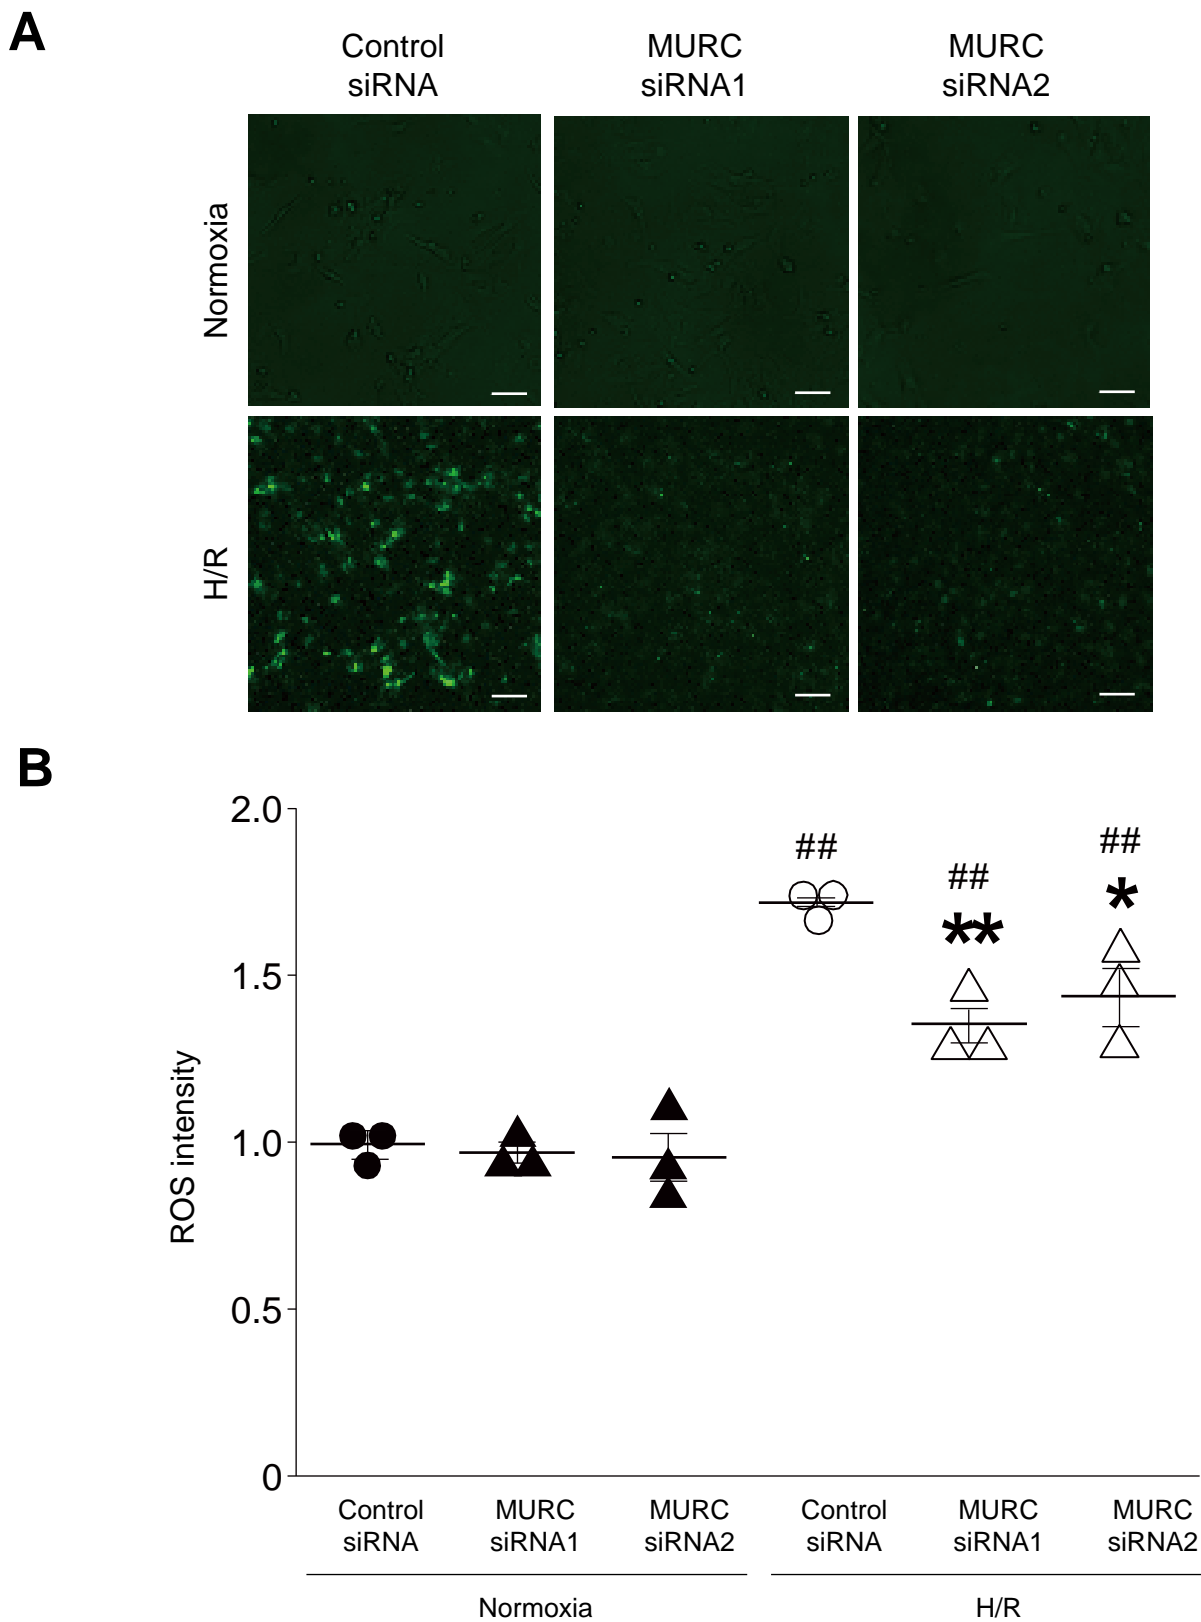

**Figure S5. MURC knockdown ameliorates ROS production in cardiomyocytes after H/R.** (A) Representative photos of *in vitro* ROS detection as measured by Cell ROX staining in H/R stimulating-neonatal rat cardiomyocytes transfected with control siRNA, MURC siRNA1 or MURC siRNA2. (B) Quantification of *in vitro* ROS production. n = 3 per group. ## $P < 0.01$  vs. corresponding normoxia group; \* $P < 0.05$ , \*\* $P < 0.01$  vs. control siRNA in H/R group. Scale bar, 50  $\mu\text{m}$ . ROS, reactive oxygen species; H/R, hypoxia-reoxygenation.

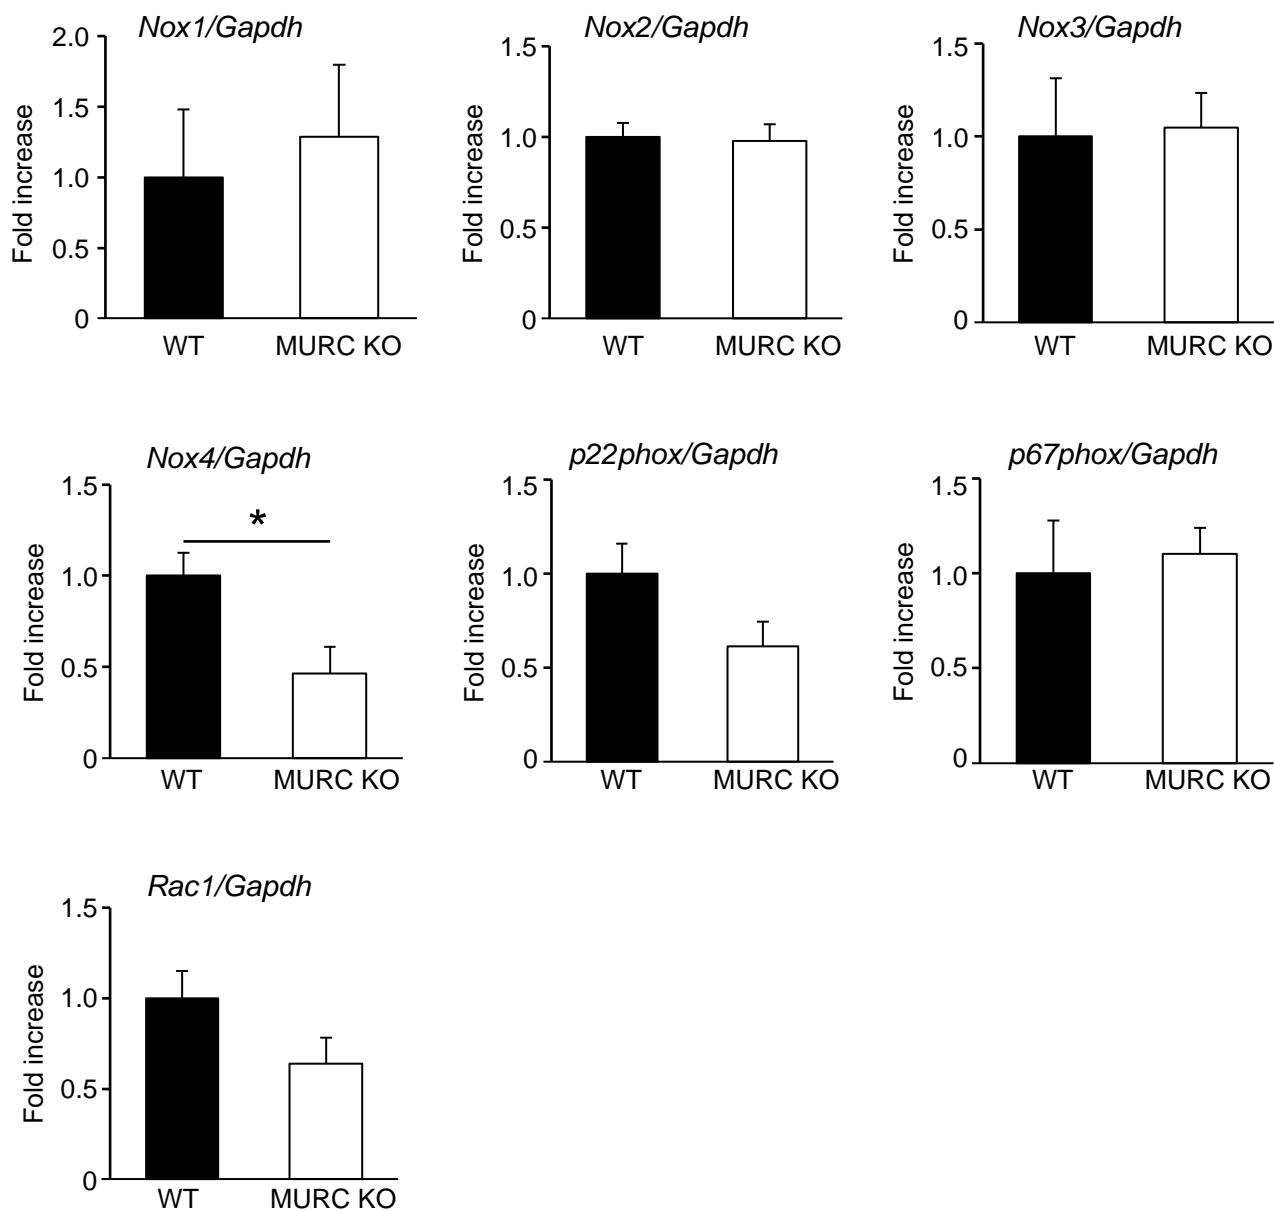

**Figure S6. mRNA expression of NADPH oxidase (Nox) family genes in WT and MURC KO mouse hearts 24 h after I/R.** Data are presented as mean  $\pm$  SEM. \* $P < 0.05$ .  $n = 4$  per groups. Rac1, RAS-related C3 botulinus toxin substrate 1.

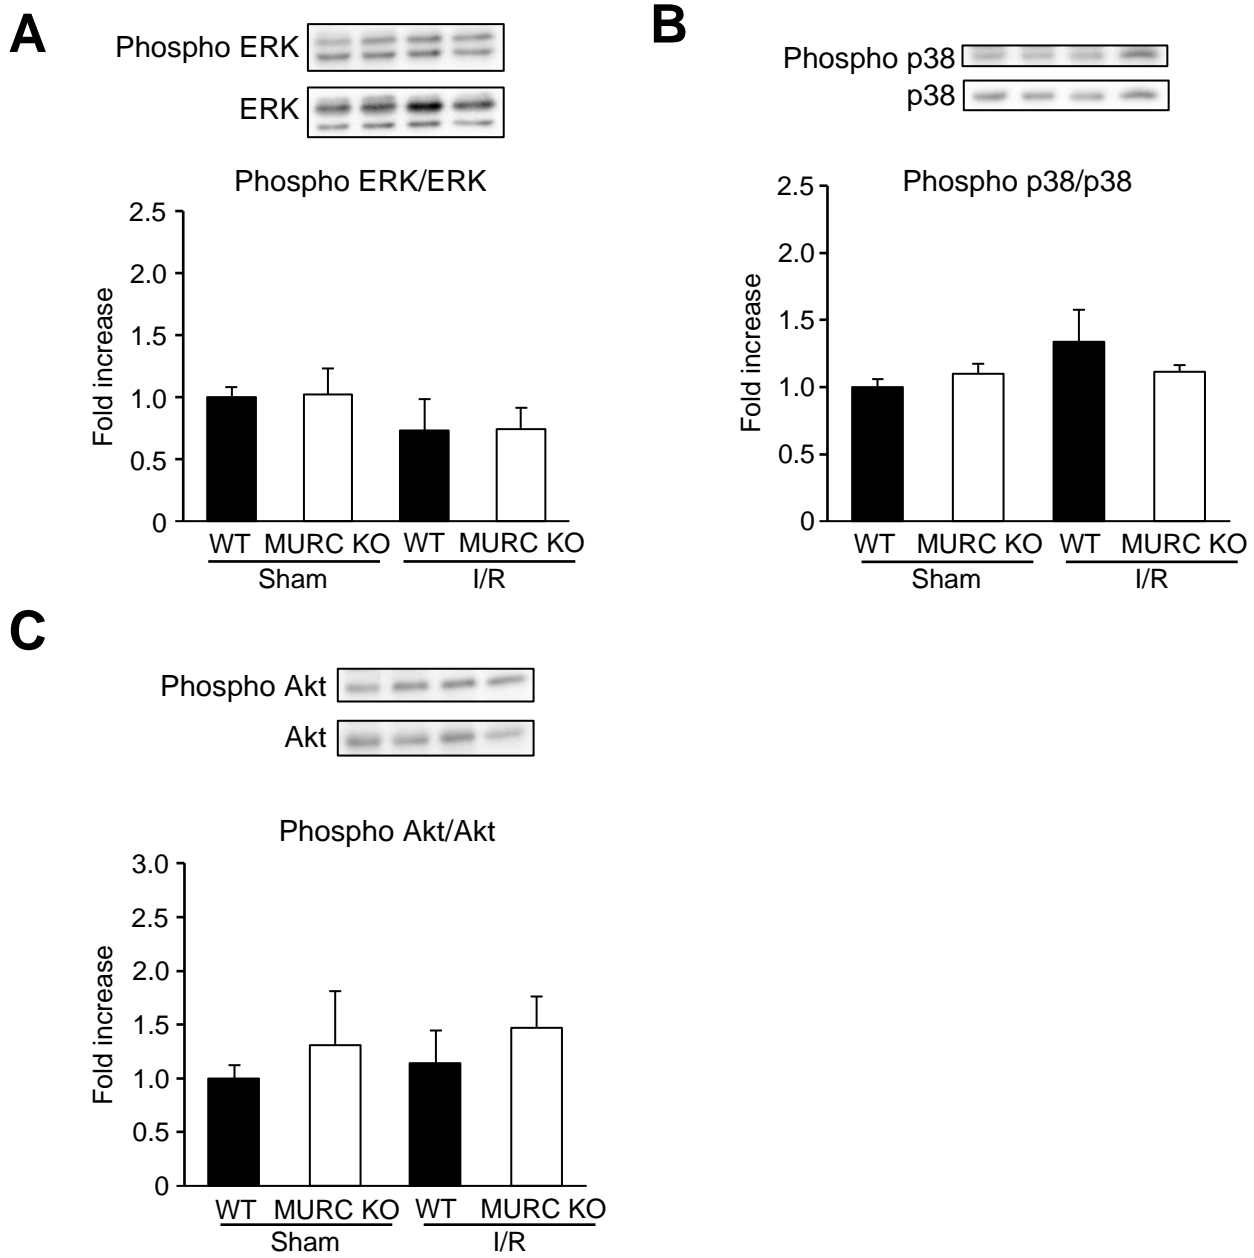

**Figure S7. (A-C) Representative Western blots (upper panel) and its quantification (lower graph) of the activation of apoptosis-related proteins in WT and MURC KO mouse hearts 24 h after I/R.** Data are presented as mean  $\pm$  SEM. n = 5 per group. ERK, extracellular signal-regulated kinase; p38, mitogen-activated protein kinase p38; Akt, phosphoinositide-3-kinase-protein kinase B.

**A**

Phase contrast

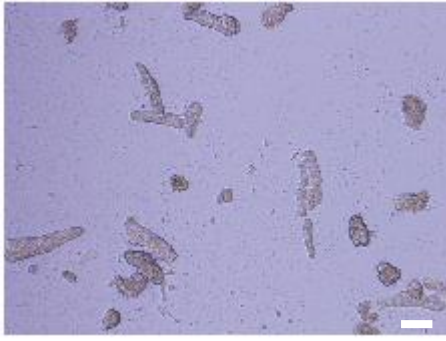**B**

WT

MURC KO

DAPI

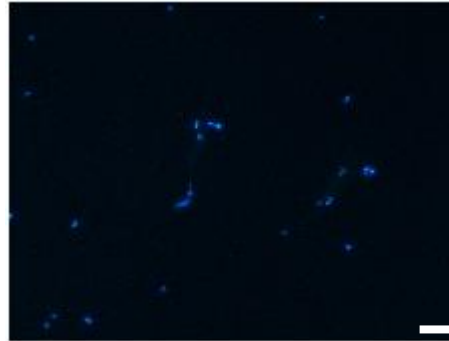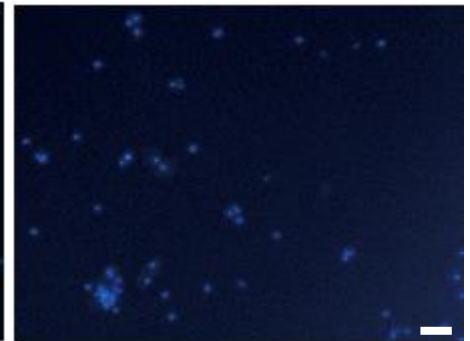

TUNEL

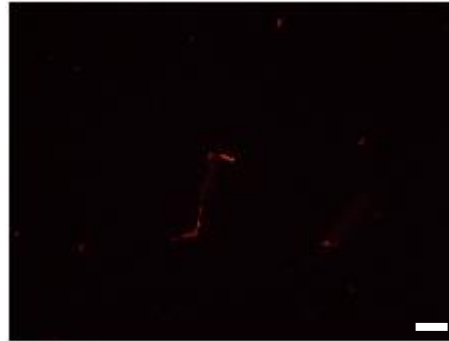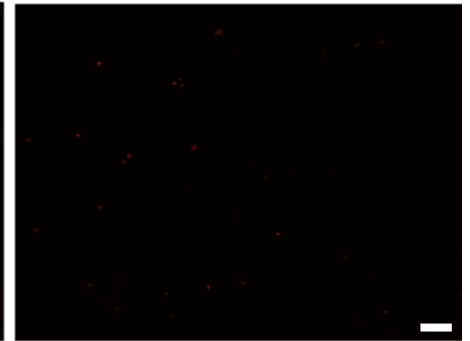

Merged

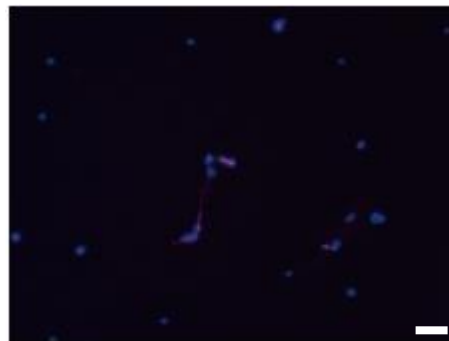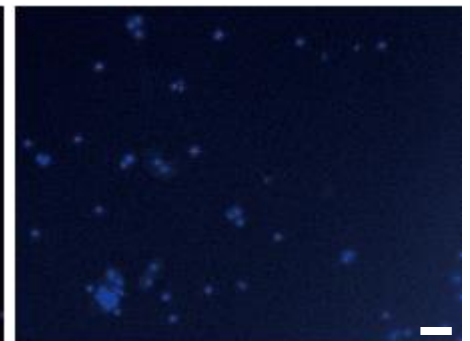**C**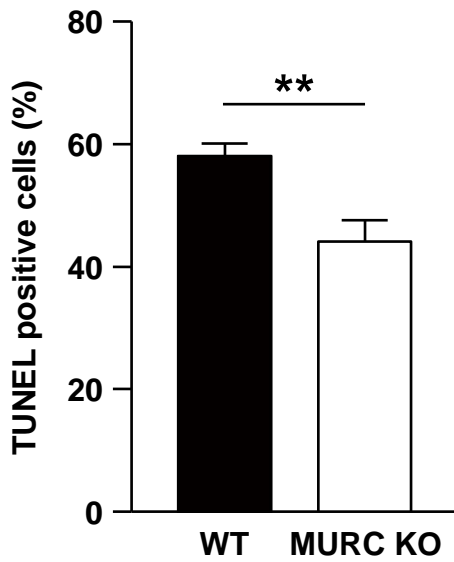

**Figure S8. A, Cardiomyocytes isolated from adult mouse heart after incubation for 24 h. Rod-shaped cells are alive cardiomyocytes. B and C, Representative TUNEL staining (B) and its quantification (C) of WT and MURC KO adult mouse cardiomyocytes after H<sub>2</sub>O<sub>2</sub> exposure. The number of cell death was assessed by the percentage of TUNEL positive cells / DAPI positive cells. n = 5 per group. Data are presented as mean ± SEM. \*\**P* < 0.01. Scale bar indicates 50 μm.**



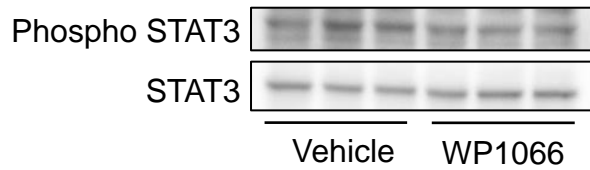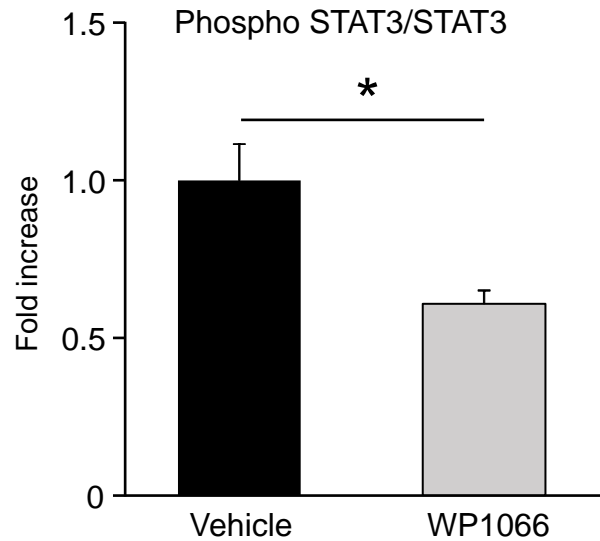

**Figure S9. STAT3 inhibitor cancels the cardioprotective effect of MURC deficiency.** (A) Representative Western blots (upper) and its quantification (lower) of mouse hearts after WP1066 or vehicle i.p. injection daily for 3 days.  $n = 3$  per group.  $*P < 0.05$ . Data are presented as mean  $\pm$  SEM. WP1066, a STAT3 inhibitor.

**A**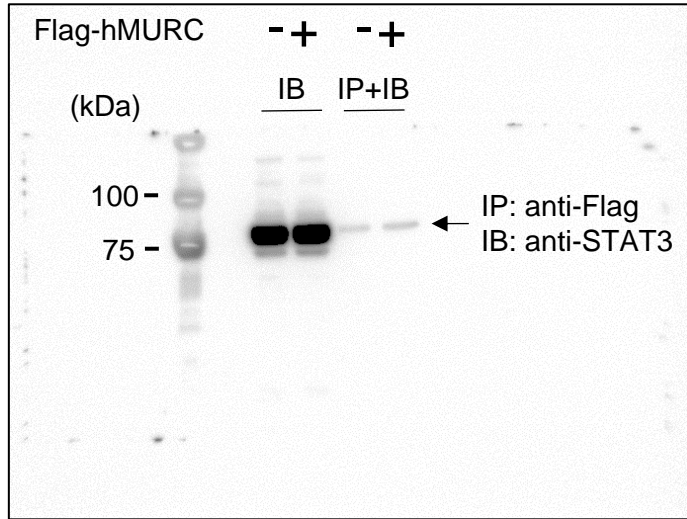**B**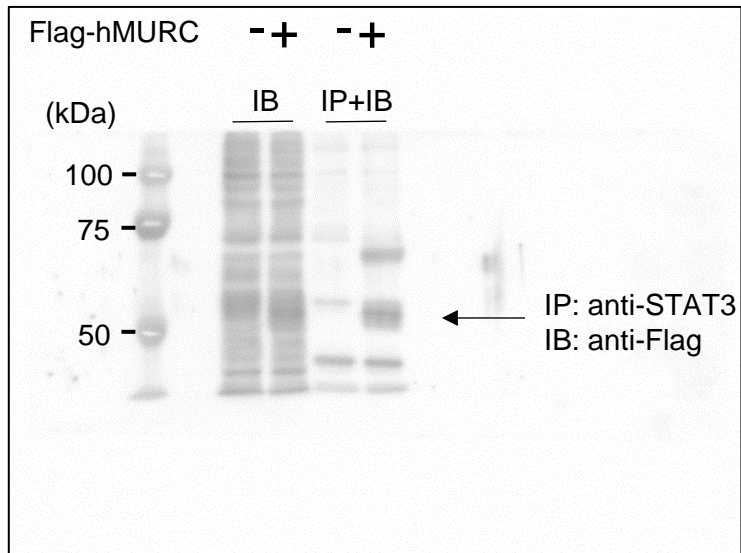

**Figure S10. Immunoprecipitation of MURC and STAT3 in neonatal rat cardiomyocytes transduced with Lac Z or Flag-human (h) MURC. IP, immunoprecipitation; IB, immunoblotting.**

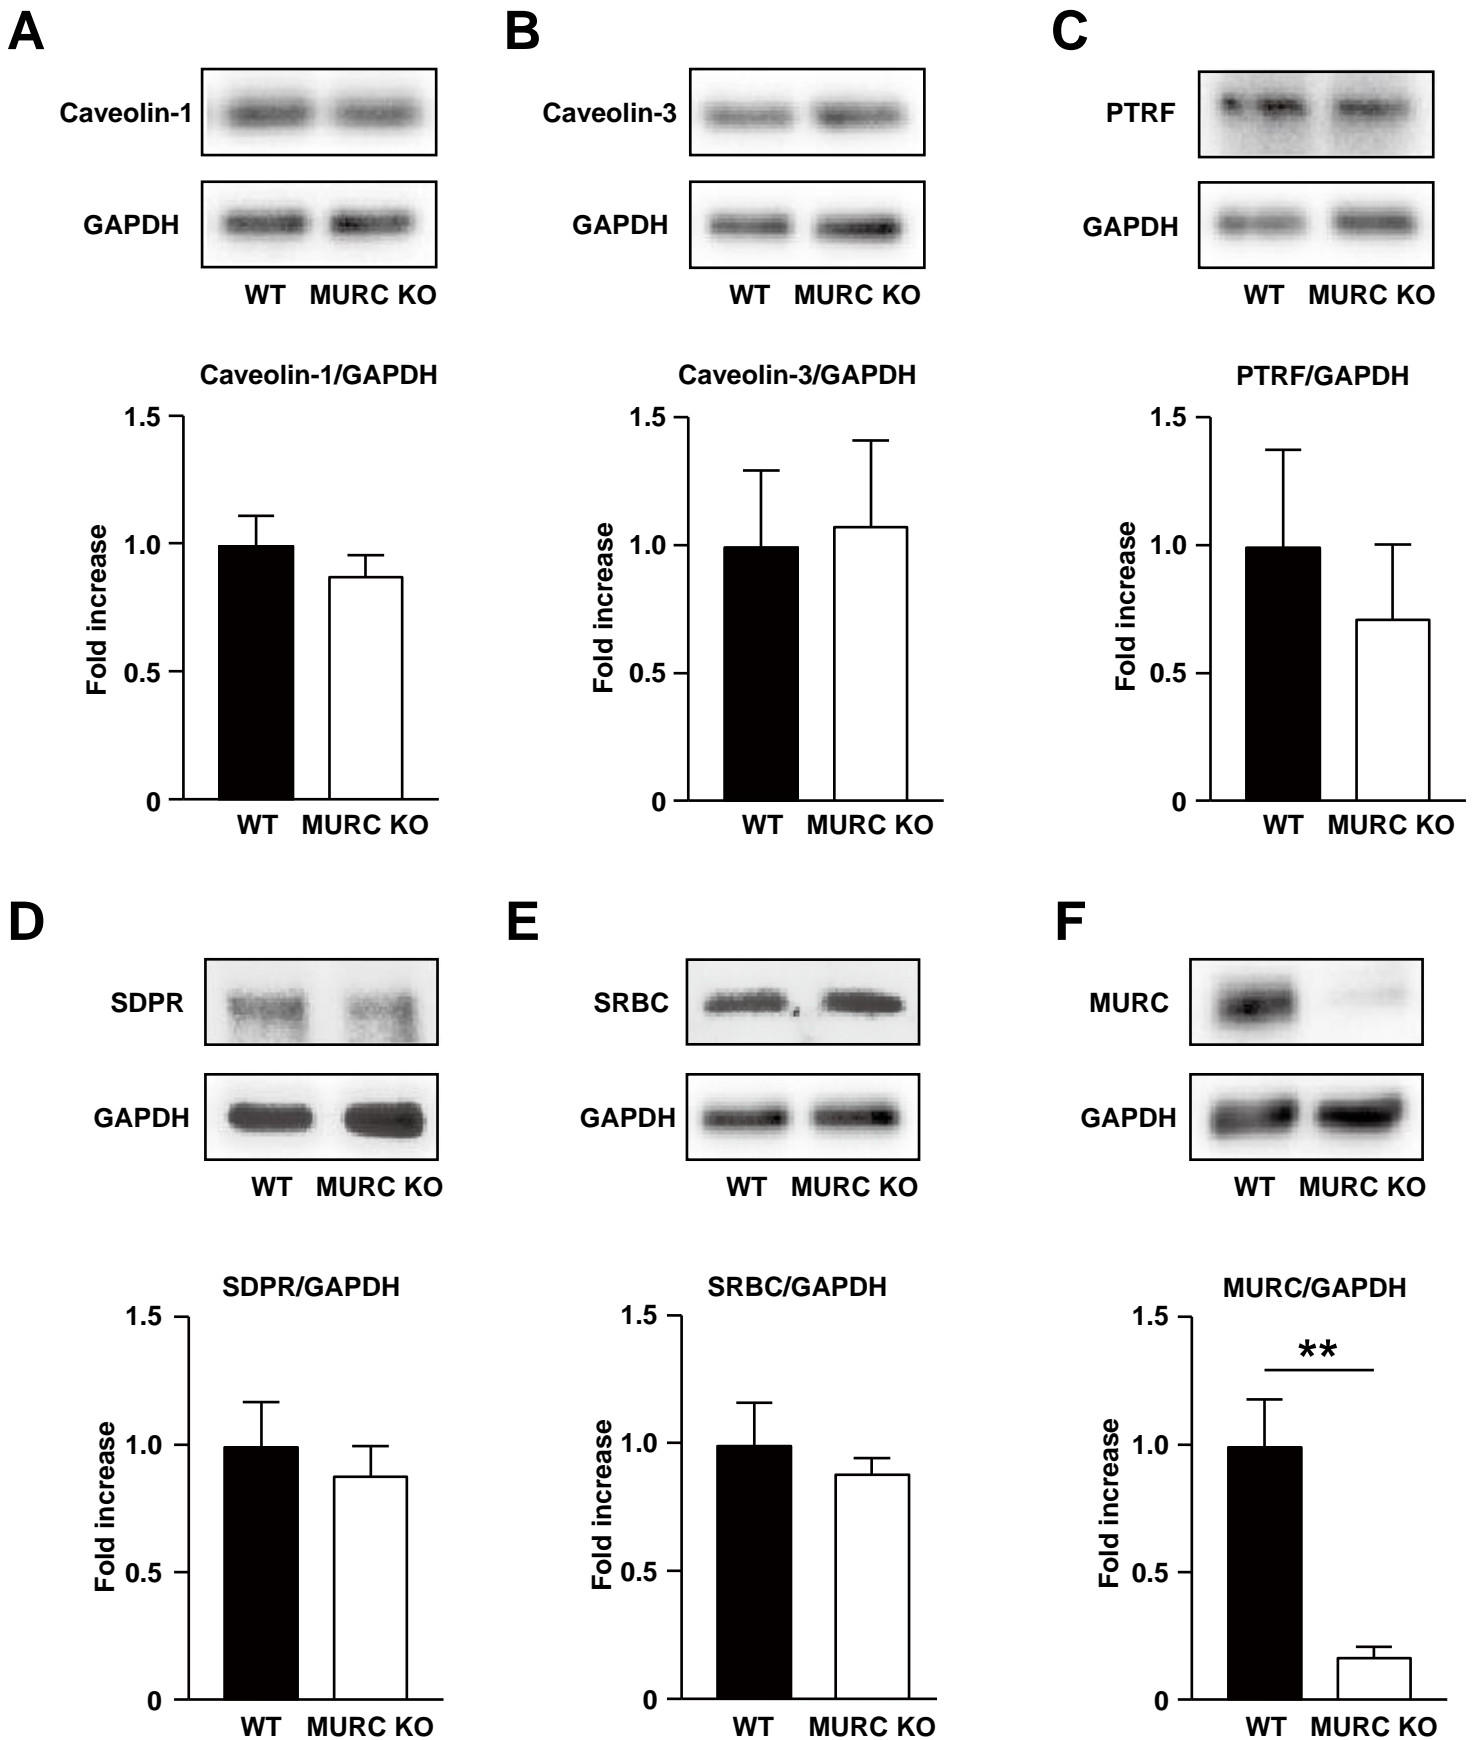

**Figure S11. (A-F) Representative Western blots (upper panel) and its quantification (lower graph) of the caveola-related proteins in WT and MURC KO mouse hearts.**  $n = 5$  per group. Data are presented as mean  $\pm$  SEM. **\*\*** $P < 0.01$ . PTRF, polymerase I and transcript release factor; SDPR, serum deprivation protein response; SRBC, SDR-related gene product that binds to C kinase.
